# Supplementary material for: A punctuated burst of massive genomic rearrangements by chromosome shattering and the origin of non-marine annelids
Source: Research Square preprint supplement (doi:10.21203/rs.3.rs-4346819/v1), 2024-05-21
Supplement: Supplementary file 1 [file 19a999c54fddc5ed1f3a2a21.xlsx]

## Sheet: General
Supplementary Table 3. Transposable element insertions in each of the genomes assessed. TEs stands for the total number of insertions and Superfamilies to the number of TE superfamilies that have insertions in each genome. DNAcounts, LINEcounts, LTRcounts, RCcounts and SINEcounts refer to the number of insertions belonging to each of those orders while Unknowncounts refers to the number of insert…
Species	TEs	% of bases_covered	Superfamilies	DNAcounts	LINEcounts	LTRcounts	RCcounts	SINEcounts	Unknowncounts	DNAcov	LINEcov	LTRcov	RCcov	SINEcov	Unknowncov
LLON	412944	33.03	52	17007	19042	41579	1145	6625	327546	3.51	2.02	6.84	0.23	0.23	20.19
PMAX	837659	27.79	50	52489	55576	57528	332	3284	668450	1.91	2.73	2.79	0.04	0.08	20.24
OFUS	695791	42.06	46	38571	22084	38673	1352	2186	592925	2.57	2.23	3.87	0.2	0.07	33.13
SNUD	1492056	41.78	51	57700	67079	84269	11006	8051	1263951	1.21	2.38	4.78	0.33	0.1	32.97
APAC	587563	29.75	38	23084	56962	37732	539	4885	464361	1.05	4.99	2.85	0.09	0.21	20.57
AVIR	866086	36.11	54	38670	65766	61769	15054	5668	679159	3.5	3.75	4.57	0.42	0.08	23.79
DGYR	13158	7.16	10	2751	168	2223	36	0	7980	1.7	0.38	2.1	0	0	2.97
RPAC	367610	19.64	38	9152	78641	5154	174	18281	256208	0.62	7.5	0.28	0.04	0.5	10.71
PECH	1531659	50.78	58	126760	288282	114975	0	33515	968127	6.78	15.42	5	0	0.6	22.96
OFRA	134814	17.98	23	9239	19098	2085	910	0	103482	1.92	3.31	0.29	0.19	0	12.26
OALV	883339	35.99	55	43905	152190	18314	613	45342	622975	2.96	7.38	1.4	0.01	1.18	23.07
LSAT	991055	38.84	61	60793	208182	45127	82	477	28977	3.09	12.26	2.46	0.02	0.69	20.31
PROT	938135	44.29	47	113112	33669	55761	8355	0	727238	9.53	2.5	5.71	0.32	0	26.22
SBEN	1046903	36.53	55	35477	78266	57250	1066	23441	851403	1.99	3.85	4.09	0.05	0.67	25.88
CTEL	304609	27.29	52	18699	40285	19464	197	150	225814	1.93	4.38	2.58	0.02	0.01	18.36
TLAP	657803	42.07	47	40192	40565	81576	2451	400	492619	2.68	2.96	11.26	0.32	0.02	24.82
ECRY	799400	33.85	46	36438	210718	23322	527	2557	525838	3.43	11.88	0.94	0.01	0.05	17.53
NNAJ	1003107	36.88	53	62401	281424	26896	1207	25396	605783	4.04	12.64	1.42	0.04	0.66	18.07
CMAT	849720	34.77	49	59134	276301	28409	87	8057	477732	3.97	13.61	2.61	0	0.2	14.38
EAND	2459423	52.17	59	272399	442404	145362	25117	40086	1534055	7.47	11.23	5.71	0.51	0.57	26.69
LTER	1755036	45.51	49	181766	362814	96093	17723	3911	1092729	6.43	9.52	5.85	0.42	0.05	23.25
MVUL	1363687	42.08	54	192287	263323	23490	2993	6052	875542	6.7	10.41	1.74	0.08	0.16	23
HROB	251470	23.74	45	12194	53793	11493	60	0	173930	1.7	8.67	1.66	0.01	0	11.7
HMAN	84135	11.67	24	4662	8765	5171	1473	43	64021	0.95	3.36	1.36	0.22	0	5.79
HNIP	171775	23.6	39	28086	23177	5502	1580	104	113326	4.72	6.78	1.72	0.45	0.01	9.93
WPIG	139431	18.75	44	21726	19066	5102	950	70	92517	4.34	4.29	1.68	0.11	0.01	8.33

## Sheet: CountsbySuperfamily
	LLON	PMAX	OFUS	SNUD	APAC	AVIR	DGYR	RPAC	PECH	OFRA	OALV	LSAT	PROT	SBEN	CTEL	TLAP	ECRY	NNAJ	CMAT	EAND	LTER	MVUL	HROB	HMAN	HNIP	WPIG
DNA	875	996	3354	3849	729	1331	0	74	549	291	1304	3180	816	1058	135	2001	309	321	400	7669	4052	7049	278	0	1117	430
DNA/Academ-1	882	459	3059	1449	686	1670	0	34	26832	0	17423	7703	0	11239	1251	23884	255	322	322	3741	2204	553	0	0	0	0
DNA/Academ-2	0	1139	0	0	0	0	0	0	0	0	0	574	1404	0	0	0	0	0	0	0	0	0	0	0	0	0
DNA/Academ-H	0	0	0	2040	0	322	0	0	0	0	0	0	0	0	0	0	0	0	0	0	0	0	0	0	0	0
DNA/CMC-Chapaev	97	0	107	183	75	0	0	0	0	0	0	0	0	119	0	0	0	0	0	0	0	0	0	0	0	0
DNA/CMC-Chapaev-3	0	0	0	0	0	0	0	0	0	0	0	0	0	0	0	0	757	6349	4510	2859	3849	6684	326	37	27	0	Only in Clitellata
DNA/CMC-EnSpm	24	2430	60	2485	14742	1852	0	0	992	1214	605	659	25807	804	108	1692	236	834	996	0	12036	1640	0	158	163	257
DNA/Crypton	0	2914	211	0	0	0	0	0	0	0	0	0	7498	753	0	264	0	0	0	0	0	0	0	0	0	0
DNA/Crypton-A	0	1406	28	278	0	1405	0	0	517	0	0	0	0	438	186	798	0	0	0	327	0	0	0	0	0	0
DNA/Crypton-H	0	0	0	0	0	164	0	0	0	0	0	591	0	0	0	0	0	0	0	0	0	0	0	0	0	0
DNA/Crypton-V	0	0	0	0	0	0	0	0	324	0	0	530	1334	288	0	359	0	58	0	526	0	0	0	0	0	0
DNA/Dada	40	358	183	0	0	0	0	0	0	0	501	0	1026	80	21	0	0	0	0	0	1808	0	167	0	0	0
DNA/Ginger-1	75	0	0	0	0	0	0	177	2124	751	264	0	376	75	218	0	0	213	106	3072	3311	0	0	0	0	0
DNA/Ginger-2	0	0	0	345	0	0	0	0	0	0	0	231	1581	126	0	0	120	0	0	252	0	1001	0	0	0	0
DNA/hAT	38	0	0	526	0	0	0	0	1268	0	0	1322	117	84	0	80	100	1991	966	16198	1115	5032	265	0	0	221
DNA/hAT-Ac	339	1537	138	7557	340	281	0	329	6003	617	2321	2593	3123	1130	1227	517	5567	9187	3485	27493	23916	14772	1752	767	4324	4556
DNA/hAT-Blackjack	154	0	0	0	0	0	0	290	1146	0	683	873	0	78	106	0	0	268	10463	8322	4188	2019	34	0	0	62
DNA/hAT-Charlie	19	0	0	390	0	116	0	529	8573	0	200	4464	0	0	675	1121	290	5751	4738	50920	30061	59615	2764	236	4756	3147
DNA/hAT-hAT19	0	0	0	36	0	0	0	0	0	0	0	0	0	0	0	0	0	0	80	82	0	662	0	0	0	0
DNA/hAT-hAT5	0	981	0	2237	0	511	0	122	2346	0	1453	1727	872	571	158	0	306	0	0	170	0	101	0	0	183	293
DNA/hAT-hAT6	0	0	0	228	0	0	0	0	587	0	179	0	0	0	0	0	0	446	0	530	0	0	0	0	0	0
DNA/hAT-hATm	0	0	85	0	1678	6248	0	0	335	1827	0	691	0	9807	44	229	1231	3230	1495	39368	19163	9196	529	154	1105	745
DNA/hAT-hATw	0	0	0	0	117	0	0	0	341	0	40	47	0	39	0	0	0	0	0	0	0	0	0	0	0	0
DNA/hAT-hATx	0	0	0	0	0	0	0	0	0	0	0	0	0	0	0	0	0	0	0	418	78	150	0	0	112	165
DNA/hAT-hobo	0	0	88	0	0	0	0	0	0	0	0	0	0	31	0	0	0	296	79	0	0	0	0	0	222	66
DNA/hAT-Pegasus	0	0	0	0	0	0	0	0	0	0	0	0	0	0	0	0	0	0	0	0	0	0	86	0	0	0
DNA/hAT-Tag1	0	0	0	3720	32	213	0	1004	1132	0	469	237	2236	69	0	0	412	0	0	2406	4	866	0	0	560	84
DNA/hAT-Tip100	55	96	10149	163	336	670	0	102	11170	0	2303	7861	512	2180	966	285	1364	7543	5085	42022	17616	49860	2558	0	4412	4915
DNA/IS3EU	817	6	144	4482	0	203	0	234	3123	422	0	578	0	0	537	4263	46	0	0	1162	0	0	0	0	0	0
DNA/Kolobok-E	0	0	0	0	0	0	0	0	0	0	0	0	0	74	0	0	0	0	0	0	0	0	0	0	0	0
DNA/Kolobok-Hydra	171	0	0	277	0	0	0	243	690	438	576	493	0	0	0	0	0	0	0	0	0	0	0	0	0	0	-- in Clitellata
DNA/Kolobok-T2	690	57	149	630	37	192	0	0	4613	0	178	1067	0	164	265	244	0	0	0	0	0	824	0	0	0	0
DNA/Maverick	4041	1405	469	739	99	9068	0	3127	14309	0	1653	3409	20490	2248	411	813	4045	2148	5220	6962	7872	0	0	0	0	31
DNA/Merlin	0	82	0	354	0	37	165	0	355	0	230	193	0	0	68	0	0	2975	1042	7289	1304	1384	311	90	187	135
DNA/MULE	0	0	0	0	0	0	0	0	0	0	0	0	0	0	0	0	94	0	0	0	0	0	0	0	0	0
DNA/MULE-MuDR	561	2644	1461	1920	236	452	1107	479	1920	0	977	2029	5743	106	265	397	55	2341	1926	4927	13061	46	307	256	385	106
DNA/MULE-NOF	80	0	0	0	0	0	0	0	699	0	0	0	55	141	0	0	2627	54	0	0	0	0	286	662	416	585
DNA/P	462	0	38	0	43	2070	0	440	5039	1309	688	2531	135	565	1139	0	165	2811	1467	1004	2915	1265	1362	0	172	83
DNA/PIF-Harbinger	3127	1806	513	436	382	2784	0	0	1487	1071	1881	1134	10825	2382	59	580	0	235	108	0	0	8625	0	0	357	0
DNA/PIF-ISL2EU	0	109	42	586	566	638	0	0	10815	94	1441	995	1020	333	428	221	345	205	0	3197	4106	753	0	0	0	0
DNA/PIF-Spy	0	2198	541	0	0	0	0	0	0	0	0	0	0	0	0	0	0	0	0	0	0	0	0	0	0	0
DNA/PiggyBac	337	469	0	3765	0	192	0	0	753	1205	74	591	0	64	788	0	3537	2870	5737	4084	3121	6939	91	0	656	235
DNA/Sola-1	206	96	0	0	0	0	0	80	457	0	225	668	0	0	776	0	112	86	114	276	187	0	0	0	25	0
DNA/Sola-2	0	0	138	0	227	704	0	272	10824	0	3803	3706	0	0	0	0	71	828	931	0	1563	492	234	0	230	330
DNA/Sola-3	370	0	0	0	0	0	0	0	0	0	0	0	0	0	0	0	0	0	0	0	0	0	0	0	0	0
DNA/TcMar	0	0	0	0	0	0	0	0	0	0	0	0	2095	0	106	0	0	0	0	0	0	0	0	0	0	0
DNA/TcMar-Fot1	0	242	0	100	0	0	0	1237	4322	0	1649	3835	74	168	101	85	36	370	107	1520	1753	251	283	0	0	0
DNA/TcMar-ISRm11	0	42	0	0	0	0	0	0	0	0	0	0	0	0	0	0	0	0	0	0	0	0	146	0	0	0
DNA/TcMar-m44	0	0	0	0	0	0	0	0	0	0	0	0	693	0	0	0	0	0	0	0	0	0	0	0	0	0
DNA/TcMar-Mariner	0	3108	7055	0	0	0	352	0	0	0	626	0	173	0	657	91	236	0	58	816	1957	1985	289	0	169	503
DNA/TcMar-Pogo	0	2455	3821	15605	0	2015	0	0	600	0	247	1622	4153	153	1448	32	0	67	0	341	0	76	0	626	937	855
DNA/TcMar-Tc1	1258	2379	6738	345	0	4253	1127	0	1170	0	1912	1972	18786	0	5928	2115	14122	1061	4779	27872	20526	5607	58	1676	2534	1723
DNA/TcMar-Tc2	1777	198	0	159	2759	0	0	0	0	0	0	206	455	63	362	86	0	810	280	2270	0	97	0	0	4242	1792
DNA/TcMar-Tigger	333	22743	0	2816	0	542	0	117	1345	0	0	2373	1713	0	0	0	0	8731	4087	754	0	1483	0	0	333	159
DNA/Zator	0	134	0	0	0	0	0	0	0	0	0	108	0	47	0	0	0	0	553	3550	0	3257	68	0	462	248
DNA/Zisupton	179	0	0	0	0	737	0	262	0	0	0	0	0	0	266	35	0	0	0	0	0	3	0	0	0	0
LINE	141	470	590	1918	203	419	0	828	3315	160	1512	1296	476	275	465	582	8865	5924	20916	2548	550	2047	467	0	0	851
LINE/CR1	1281	8236	1386	432	5039	1152	0	23146	67287	239	23902	68273	868	9641	4269	1566	14276	5783	2933	25114	4637	30258	2864	1479	6010	4154
LINE/CR1-Zenon	218	11183	2869	2561	1480	1114	0	129	1221	0	0	1280	0	1255	1313	2546	0	0	116	1157	119	0	2	0	0	0
LINE/CRE	0	0	0	0	0	0	0	0	0	0	0	0	0	0	247	0	18569	11854	17278	29977	21824	7758	6737	0	0	0	++ in Clitellata
LINE/Dong-R4	78	0	0	0	0	0	0	0	0	0	0	0	0	0	0	0	0	0	0	0	0	0	236	950	2995	2018	Only in Leeches
LINE/I	1265	5814	0	772	11879	11544	0	0	395	0	56	175	8466	0	1682	1958	31	1230	362	3999	2920	414	2086	79	2732	2960
LINE/I-Jockey	1725	0	301	312	0	87	0	0	1929	0	248	3303	0	317	0	0	2922	1095	1022	525	1133	3759	466	0	0	1
LINE/L1	63	990	139	3462	0	77	0	0	0	482	1615	0	729	551	251	215	0	1175	3620	2693	1459	4594	670	0	0	0
LINE/L1-Tx1	379	7978	3050	14192	2108	100	0	162	978	0	1996	326	4787	5245	0	1217	0	0	23	0	107	0	0	0	0	37
LINE/L2	5286	2114	3882	20273	28964	31946	0	38933	99373	13613	64726	54351	11345	9452	16883	15710	76983	216438	191284	289293	260457	136083	18063	2212	5371	5710	++ in Clitellata
LINE/Penelope	1142	2790	1102	7658	1998	214	149	875	8384	223	3979	5892	623	21961	359	11105	616	213	1529	294	377	984	10657	34	101	159
LINE/Proto2	2158	1211	514	2020	1837	6221	0	1411	10484	1297	4797	6803	696	7559	9875	1819	7333	1172	776	1048	269	1162	63	0	0	0
LINE/R1	0	0	0	0	45	0	0	0	0	0	865	0	0	0	0	0	0	0	0	0	0	0	81	0	0	0
LINE/R1-LOA	84	0	68	0	0	115	0	0	0	0	0	0	0	0	0	0	0	0	0	0	0	0	0	0	0	0
LINE/R2	0	32	0	0	0	117	0	69	556	691	559	184	0	300	0	0	0	176	0	192	62	0	0	2479	2537	1370
LINE/R2-Hero	0	597	700	0	0	0	0	0	782	0	0	70	899	0	0	0	0	0	0	2551	0	0	2379	1419	3377	1748
LINE/R2-NeSL	0	0	0	0	0	0	19	0	0	2393	0	0	0	0	0	0	0	0	0	0	0	0	0	113	54	58
LINE/Rex-Babar	0	0	0	3378	0	3300	0	3587	11610	0	12362	3936	1108	1127	827	536	1571	7770	773	27812	10926	7505	1373	0	0	0
LINE/RTE	0	0	796	0	0	0	0	0	2723	0	103	0	0	0	55	0	128	91	1304	0	314	2419	138	0	0	0
LINE/RTE-BovB	3643	89	102	5030	0	248	0	7292	66252	0	25911	59331	3516	12138	2530	121	79062	28403	34365	54788	57660	66107	7472	0	0	0
LINE/RTE-RTE	0	0	0	0	0	0	0	2209	4839	0	8808	1269	0	195	0	0	49	100	0	413	0	233	0	0	0	0
LINE/RTE-X	1579	14072	6585	5071	3409	9112	0	0	8154	0	751	1693	156	8250	1529	3190	313	0	0	0	0	0	0	0	0	0
LINE/Tad1	0	0	0	0	0	0	0	0	0	0	0	0	0	0	0	0	0	0	0	0	0	0	39	0	0	0
LTR	8	0	0	0	13	0	0	372	0	0	252	510	710	69	25	1136	0	82	1917	0	0	0	17	0	0	63
LTR/Copia	179	0	0	80	92	234	0	93	61	0	21	574	185	688	447	1103	17	190	1303	2415	4459	701	3577	225	227	73
LTR/DIRS	1075	2204	533	1688	232	1122	0	0	1186	0	637	134	16402	851	184	5958	0	0	0	0	0	0	0	0	0	0	-- en Clitellata
LTR/ERV-Foamy	0	0	0	0	0	0	0	0	0	0	192	0	0	0	0	0	0	0	0	0	0	0	0	0	0	0
LTR/ERV1	0	328	0	0	520	114	0	0	791	0	0	0	0	0	0	167	0	0	0	0	994	291	1150	0	0	0
LTR/ERVK	0	0	0	0	0	0	0	350	369	0	0	71	0	0	61	0	0	0	0	133	0	148	0	2747	0	0
LTR/ERVL	0	0	0	0	0	0	0	0	0	0	0	0	0	0	0	0	0	0	0	3435	0	0	0	0	0	0
LTR/Gypsy	14966	18861	10924	48688	19549	24710	728	2222	26006	1517	9850	27883	11636	30803	9952	45011	5167	11746	10485	62215	35033	11180	2351	795	2011	1603
LTR/Ngaro	2358	13793	706	8481	4674	2355	0	1873	4456	152	1551	2251	3824	979	176	2555	314	41	0	891	18	295	3027	0	0	6
LTR/Pao	10206	1046	799	2551	52	2092	303	0	607	0	242	4605	11478	3228	2179	3519	1433	0	322	4569	6421	465	0	0	129	150
LTR/Unknown	12787	21296	25711	22781	12600	31142	1192	244	81499	416	5569	9099	11526	20632	6440	22127	16391	14837	14382	71704	49168	10410	1371	1404	3135	3207
Other/DNA_virus	0	0	0	0	0	0	0	0	0	0	0	82	0	0	0	0	0	0	0	0	0	0	0	0	0	0
RC/Helitron	1145	332	1352	11006	539	15054	36	174	0	910	613	372	8355	1066	197	2451	527	1207	87	25117	17723	2993	60	1473	1580	950
RC/Helitron-2	0	0	0	0	0	0	0	0	0	0	0	105	0	0	0	0	0	0	0	0	0	0	0	0	0	0
SINE?	0	0	438	0	37	376	0	0	0	0	0	0	0	0	150	44	0	0	0	69	56	0	0	0	0	0
SINE/5S-Deu-L2	0	0	0	0	0	864	0	0	0	0	297	0	0	0	0	202	4	27	2169	0	0	4907	0	0	0	0
SINE/Alu	23	0	0	0	0	0	0	0	0	0	0	0	0	0	0	0	0	0	0	0	0	0	0	43	104	70
SINE/B2	0	474	0	0	4848	1921	0	0	0	0	0	0	0	0	0	0	0	0	0	0	0	0	0	0	0	0
SINE/B4	0	0	0	0	0	0	0	0	0	0	0	0	0	0	0	0	2553	0	0	0	0	0	0	0	0	0
SINE/ID	343	0	1586	3016	0	0	0	0	0	0	0	0	0	0	0	154	0	0	0	0	0	0	0	0	0	0
SINE/MIR	5644	2810	0	0	0	480	0	18281	33515	0	45045	28977	0	0	0	0	0	15645	5888	19627	0	1145	0	0	0	0
SINE/tRNA-Core-RTE	615	0	162	5035	0	0	0	0	0	0	0	0	0	23441	0	0	0	8421	0	20390	0	0	0	0	0	0
SINE/tRNA-Deu	0	0	0	0	0	0	0	0	0	0	0	0	0	0	0	0	0	1303	0	0	0	0	0	0	0	0
SINE/tRNA-V	0	0	0	0	0	0	0	0	0	0	0	0	0	0	0	0	0	0	0	0	3855	0	0	0	0	0
SINE/tRNA-V-CR1	0	0	0	0	0	2027	0	0	0	0	0	0	0	0	0	0	0	0	0	0	0	0	0	0	0	0
Unknown	327546	668450	592925	1263951	464361	679159	7980	256208	968127	103482	622975	647417	727238	851403	225814	492619	525838	605783	477732	1534055	1092729	875542	173930	64021	113326	92517
TOTAL	412944	837659	695791	1492056	587563	866086	13158	367610	1531659	134814	883339	991055	938135	1046903	304609	657803	799400	1003107	849720	2459423	1755036	1363687	251470	84135	171775	139431

## Sheet: Species_codes
Species name	Acronym
Alitta virens	AVIR1
Arenicola marina	COCO2
Aulodrilus japonicus	AUJA1
Capitella teleta	CTEL
Carpetania matritensis	CMAT
Cirratulus cirratus	CCIR1
Drosophila melanogaster	-
Eisenia andrei	EAND
Enchytraeus crypticus	ECRY
Gallus gallus	-
Hermodice carunculata	HCAR1
Hirudinaria manillensis	HMAN
Hirudo medicinalis	HMED2
Hirudo nipponia	HNIP
Hypania invalida	HINV1
Laetmonice cf. iocasica	LIOC1
Leitoscoloplos robustus	LROB1
Lepidonotopodium sp.	LEYZ1
Lineus longissimus	LLON
Magelona pitelkai	MPIT1
Mesochaetopterus minutus	MMIN1
Metaphire vulgaris	MVUL
Neoamphitrite robusta	NROB1
Norana najaformis	NNAJ
Ophryotrocha xiamen	OXIA1
Owenia fusiformis	OFUS
Paraescarpia echinospica	PECH
Parvidrilus meyssonnieri	PMEY1
Pecten maximus	PMAX
Pelodrilus sp.	PELO1
Phreodrilidae sp.	PHRE1
Propappus volki	PVOL1
Randiella sp.	RAND1
Sipunculus nudus	SNUD
Sipunculus nudus	SNUD1
Streblospio benedicti	SBEN
Syllis gracilis	SYGR1
Terebella lapidaria	TLAP
Thoracophelia mucronata	TMUC1
Trichodrilus strandi	TSTR1
Whitmania pigra	WPIG
