# Supplementary material for: A punctuated burst of massive genomic rearrangements by chromosome shattering and the origin of non-marine annelids
Source: Research Square preprint supplement (doi:10.21203/rs.3.rs-4346819/v1), 2024-05-21
Supplement: Supplementary file 2 [file 799cf1da16f5322c5996d6d3.xlsx]

## Sheet: Sheet1
Supplementary Table 4. List of genes arising in the branch leading to Clitellata as a result of chromoanagenesis involved in response to abiotic stress. Corresponding HOG, composite/component nature, no. of genes in the same HOG, mechanism of origin (eg, fusion, fusion, de novo), putative function retrieved by BLAST and GO terms retrieved by FANTASIA (next tab) are indicated.
Gene ID in Eisenia andrei	HOG	Is Composite?	Are there more composites in the same HOG?	Is Component?	No. Genes in HOG that are components	No. Genes per composite HOG for which genes in the HOG are components of	Origin of HOG	BLAST
EAND.evm.TU.ctg2940.1	HOG00040541_63	NO	.	YES	Genes 6/6	53 HOG00073164_69 6 HOG00012314_41 5 HOG00034969_61	Fission old composite	myosin III-a
EAND.evm.TU.Chr02.1161	HOG00040305_63	NO	.	YES	Genes 12/12	12 HOG00027632_58 11 HOG00025968_57 7 HOG00021267_56	De novo + fussion for crassi composites	fos-related antigen 2-like isoform X1
EAND.evm.TU.Chr08.570	HOG00043057_63	NO	.	YES	Genes 6/6	53 HOG00073556_69 24 HOG00101314_73 19 HOG00102772_73 18 HOG00054671_67 17 HOG00055250_67 12 HOG00077251_69 12 HOG00070641_68 12 HOG00048688_65 10 HOG00088796_71 10 HOG00080760_70 8 HOG00056686_67 8 HOG00041658_63 7 HOG00107237_73 6 HOG00083882_70 6 HOG00083052_70 6 HOG00079036_69 6 HOG00053075_66 6 HOG00042544_63 5 HOG00040963_63 4 HOG00022161_56 3 HOG00032805_60 3 HOG00028187_58 2 HOG00107176_7…	Fission old composite	Antistatin
EAND.evm.TU.ctg2177.3	HOG00042081_63	NO	.	NO	-	-	-	No hit
EAND.evm.TU.Chr10.1856	HOG00040281_63	YES	NO	YES	Genes 13/13	42 HOG00039896_63 30 HOG00103535_73 26 HOG00095534_72 26 HOG00032279_60 17 HOG00101274_73 13 HOG00025094_57 13 HOG00024302_57 12 HOG00038132_62 12 HOG00035800_61 11 HOG00024115_57 9 HOG00011244_35 8 HOG00035554_61 7 HOG00105077_73 7 HOG00018025_49 4 HOG00039801_63 1 HOG00054135_66	Fission old composite + fussions in E. andrei to form this composite	Sodium/potassium-transporting ATPase subunit alpha-2
EAND.evm.TU.Chr09.1695	HOG00040566_63	NO	.	YES	Genes 5/5	70 HOG00100227_73	Fission old composite	Lysosomal alpha-mannosidase
EAND.evm.TU.Chr01.1390	HOG00043957_63	NO	.	YES	Genes 9/9	36 HOG00017219_49 9 HOG00032706_60 3 HOG00003625_17 1 HOG00104217_73 1 HOG00097029_72 1 HOG00081101_70 1 HOG00043884_63 1 HOG00002560_15	Uncertain. Fussion for leech composite	Hypothetical protein
EAND.evm.TU.Chr03.3017	HOG00040255_63	YES	YES (13/21 genes: 2/2 MVUL, 1/1 EAND, 2/2 CMAT, 1/2 in NNAJ, 0/1 WPIG, 1/2 HNIP, 1/1 HMED, 0/2 AUJA, 1/1 PHRE, 1/1 PVOL, 2/2 ECRY, 0/1 HMAN, 0/2 TSTR, 1/1 RAND). C243566,C873971,C247941,C377041,C94033,C102461,C799630,C559357,C616388,C886794,C221222,C383931,C575467	YES	Genes 18/21	17 HOG00103199_73 1 HOG00034718_61	This is a composite formed by fussion of old components	protein regulator of cytokinesis 1-like isoform X
EAND.evm.TU.Chr09.580	HOG00040137_63	NO	.	YES	Genes 18/18	284 HOG00104162_73 255 HOG00103353_73 61 HOG00039303_62 54 HOG00101313_73 31 HOG00051259_65 27 HOG00018863_49 23 HOG00100150_73 20 HOG00018030_49 18 HOG00105571_73 18 HOG00022533_56 17 HOG00105985_73 17 HOG00103973_73 15 HOG00103700_73 15 HOG00014824_48 13 HOG00058753_67 13 HOG00044913_64 12 HOG00103781_73 11 HOG00096412_72 10 HOG00108524_73 10 HOG00104226_73 10 HOG00102710_73 9 HOG00102882_73 8 …	Fission old composite	rho-related GTP binding protein RhoB
EAND.evm.TU.Chr07.2210	HOG00040124_63	NO	.	YES	Genes 16/16	170 HOG00081034_70 142 HOG00094085_71 98 HOG00080528_70 73 HOG00093494_71 66 HOG00101450_73 65 HOG00062041_68 56 HOG00082230_70 53 HOG00095292_72 51 HOG00032513_60 43 HOG00061911_68 39 HOG00000719_9 30 HOG00033392_60 29 HOG00026688_58 28 HOG00054902_67 27 HOG00086701_71 27 HOG00071158_68 27 HOG00029374_58 25 HOG00027086_58 24 HOG00021121_56 23 HOG00024694_57 22 HOG00075536_69 20 HOG00018084_49 19…	Fission old composite	cartilage matrix protein-like
EAND.evm.TU.Chr03.1073	HOG00040709_63	NO	.	YES	Genes 9/9	18 HOG00018148_49 9 HOG00106817_73 1 HOG00054594_67	Uncertain. Fussion for leech composite	small heat shock protein
EAND.evm.TU.Chr04.2660	HOG00042828_63	NO	.	YES	Genes 8/8	20 HOG00055728_67 11 HOG00099986_73 9 HOG00107082_73 8 HOG00101095_73 7 HOG00107005_73 7 HOG00045479_64 7 HOG00036778_62 5 HOG00051111_65 5 HOG00018400_49 4 HOG00103586_73 4 HOG00073129_69 3 HOG00096447_72 3 HOG00094528_71 2 HOG00096004_72 2 HOG00051902_65 2 HOG00017348_49 1 HOG00097316_72 1 HOG00092785_71 1 HOG00092588_71 1 HOG00084722_70 1 HOG00055437_67 1 HOG00018109_49 1 HOG00015418_49	Fission old composite	Hypothetical protein

## Sheet: GO_terms_FANTASIA
Gene ID Eisenia andrei, GO term retrieved with FANTASIA, reliability index (see Martínez-Redondo et al. 2024, https://doi.org/10.1101/2024.02.28.582465), GO term description
EAND.evm.TU.Chr01.1390 GO:0007399 0.35 nervous system development
EAND.evm.TU.Chr01.1390 GO:0005515 0.35 protein binding
EAND.evm.TU.Chr01.1390 GO:0030368 0.35 interleukin-17 receptor activity
EAND.evm.TU.Chr01.1390 GO:0036128 0.35 CatSper complex
EAND.evm.TU.Chr01.1390 GO:0097228 0.35 sperm principal piece
EAND.evm.TU.Chr02.1161 GO:0006357 0.41 regulation of transcription by RNA polymerase II
EAND.evm.TU.Chr02.1161 GO:0008340 0.41 determination of adult lifespan
EAND.evm.TU.Chr02.1161 GO:0009636 0.41 response to toxic substance
EAND.evm.TU.Chr02.1161 GO:0033120 0.41 positive regulation of RNA splicing
EAND.evm.TU.Chr02.1161 GO:0042127 0.41 regulation of cell population proliferation
EAND.evm.TU.Chr02.1161 GO:0042594 0.41 response to starvation
EAND.evm.TU.Chr02.1161 GO:0051726 0.41 regulation of cell cycle
EAND.evm.TU.Chr02.1161 GO:0000978 0.41 RNA polymerase II cis-regulatory region sequence-specific DNA binding
EAND.evm.TU.Chr02.1161 GO:0000981 0.41 DNA-binding transcription factor activity, RNA polymerase II-specific
EAND.evm.TU.Chr02.1161 GO:0061629 0.41 RNA polymerase II-specific DNA-binding transcription factor binding
EAND.evm.TU.Chr02.1161 GO:0005634 0.41 nucleus
EAND.evm.TU.Chr02.1161 GO:0005667 0.41 transcription regulator complex
EAND.evm.TU.Chr03.1073 GO:0009968 0.32 negative regulation of signal transduction
EAND.evm.TU.Chr03.1073 GO:0050790 0.32 regulation of catalytic activity
EAND.evm.TU.Chr03.1073 GO:0005515 0.34 protein binding
EAND.evm.TU.Chr03.1073 GO:0005938 0.32 cell cortex
EAND.evm.TU.Chr03.3017 GO:0000226 0.4 microtubule cytoskeleton organization
EAND.evm.TU.Chr03.3017 GO:0008017 0.4 microtubule binding
EAND.evm.TU.Chr03.3017 GO:0000922 0.4 spindle pole
EAND.evm.TU.Chr03.3017 GO:0005634 0.4 nucleus
EAND.evm.TU.Chr03.3017 GO:0005737 0.4 cytoplasm
EAND.evm.TU.Chr03.3017 GO:0005819 0.4 spindle
EAND.evm.TU.Chr03.3017 GO:0005856 0.4 cytoskeleton
EAND.evm.TU.Chr03.3017 GO:0005874 0.4 microtubule
EAND.evm.TU.Chr04.2660 GO:0007186 0.46 G protein-coupled receptor signaling pathway
EAND.evm.TU.Chr04.2660 GO:0004930 0.46 G protein-coupled receptor activity
EAND.evm.TU.Chr04.2660 GO:0005886 0.46 plasma membrane
EAND.evm.TU.Chr07.2210 GO:0007161 0.35 calcium-independent cell-matrix adhesion
EAND.evm.TU.Chr07.2210 GO:0046626 0.35 regulation of insulin receptor signaling pathway
EAND.evm.TU.Chr07.2210 GO:0005509 0.35 calcium ion binding
EAND.evm.TU.Chr07.2210 GO:0042802 0.35 identical protein binding
EAND.evm.TU.Chr07.2210 GO:0005576 0.35 extracellular region
EAND.evm.TU.Chr07.2210 GO:0005604 0.35 basement membrane
EAND.evm.TU.Chr07.2210 GO:0005615 0.35 extracellular space
EAND.evm.TU.Chr07.2210 GO:0070062 0.35 extracellular exosome
EAND.evm.TU.Chr08.570 GO:0010951 0.31 negative regulation of endopeptidase activity
EAND.evm.TU.Chr08.570 GO:0030154 0.31 cell differentiation
EAND.evm.TU.Chr08.570 GO:0045071 0.31 negative regulation of viral genome replication
EAND.evm.TU.Chr08.570 GO:0051412 0.31 response to corticosterone
EAND.evm.TU.Chr08.570 GO:0002020 0.31 protease binding
EAND.evm.TU.Chr08.570 GO:0004867 0.31 serine-type endopeptidase inhibitor activity
EAND.evm.TU.Chr08.570 GO:0019870 0.31 potassium channel inhibitor activity
EAND.evm.TU.Chr08.570 GO:0005576 0.31 extracellular region
EAND.evm.TU.Chr08.570 GO:0005615 0.31 extracellular space
EAND.evm.TU.Chr08.570 GO:0032991 0.31 protein-containing complex
EAND.evm.TU.Chr09.580 GO:0007264 0.42 small GTPase mediated signal transduction
EAND.evm.TU.Chr09.580 GO:0007298 0.42 border follicle cell migration
EAND.evm.TU.Chr09.580 GO:0007498 0.42 mesoderm development
EAND.evm.TU.Chr09.580 GO:0007516 0.42 hemocyte development
EAND.evm.TU.Chr09.580 GO:0022409 0.42 positive regulation of cell-cell adhesion
EAND.evm.TU.Chr09.580 GO:0030707 0.42 follicle cell of egg chamber development
EAND.evm.TU.Chr09.580 GO:0035011 0.42 melanotic encapsulation of foreign target
EAND.evm.TU.Chr09.580 GO:0035099 0.42 hemocyte migration
EAND.evm.TU.Chr09.580 GO:0003924 0.42 GTPase activity
EAND.evm.TU.Chr09.580 GO:0005525 0.42 GTP binding
EAND.evm.TU.Chr09.580 GO:0005886 0.42 plasma membrane
EAND.evm.TU.Chr09.1695 GO:0006013 0.34 mannose metabolic process
EAND.evm.TU.Chr09.1695 GO:0006486 0.34 protein glycosylation
EAND.evm.TU.Chr09.1695 GO:0006491 0.34 N-glycan processing
EAND.evm.TU.Chr09.1695 GO:0006517 0.34 protein deglycosylation
EAND.evm.TU.Chr09.1695 GO:0016063 0.34 rhodopsin biosynthetic process
EAND.evm.TU.Chr09.1695 GO:0035010 0.34 encapsulation of foreign target
EAND.evm.TU.Chr09.1695 GO:0004572 0.34 mannosyl-oligosaccharide 1,3-1,6-alpha-mannosidase activity
EAND.evm.TU.Chr09.1695 GO:0030246 0.34 carbohydrate binding
EAND.evm.TU.Chr09.1695 GO:0046872 0.34 metal ion binding
EAND.evm.TU.Chr09.1695 GO:0000139 0.34 Golgi membrane
EAND.evm.TU.Chr09.1695 GO:0005783 0.34 endoplasmic reticulum
EAND.evm.TU.Chr09.1695 GO:0005794 0.34 Golgi apparatus
EAND.evm.TU.Chr09.1695 GO:0005795 0.34 Golgi stack
EAND.evm.TU.Chr10.1856 GO:0006814 0.36 sodium ion transport
EAND.evm.TU.Chr10.1856 GO:0010248 0.36 establishment or maintenance of transmembrane electrochemical gradient
EAND.evm.TU.Chr10.1856 GO:0071805 0.36 potassium ion transmembrane transport
EAND.evm.TU.Chr10.1856 GO:0005391 0.36 P-type sodium:potassium-exchanging transporter activity
EAND.evm.TU.Chr10.1856 GO:0005524 0.36 ATP binding
EAND.evm.TU.Chr10.1856 GO:0008900 0.36 P-type potassium:proton transporter activity
EAND.evm.TU.Chr10.1856 GO:0016887 0.36 ATP hydrolysis activity
EAND.evm.TU.Chr10.1856 GO:0046872 0.36 metal ion binding
EAND.evm.TU.Chr10.1856 GO:0005886 0.36 plasma membrane
EAND.evm.TU.Chr10.1856 GO:0016324 0.36 apical plasma membrane
EAND.evm.TU.Chr10.1856 GO:0006814 0.36 sodium ion transport
EAND.evm.TU.Chr10.1856 GO:0010248 0.36 establishment or maintenance of transmembrane electrochemical gradient
EAND.evm.TU.Chr10.1856 GO:0071805 0.36 potassium ion transmembrane transport
EAND.evm.TU.Chr10.1856 GO:0005391 0.36 P-type sodium:potassium-exchanging transporter activity
EAND.evm.TU.Chr10.1856 GO:0005524 0.36 ATP binding
EAND.evm.TU.Chr10.1856 GO:0008900 0.36 P-type potassium:proton transporter activity
EAND.evm.TU.Chr10.1856 GO:0016887 0.36 ATP hydrolysis activity
EAND.evm.TU.Chr10.1856 GO:0046872 0.36 metal ion binding
EAND.evm.TU.Chr10.1856 GO:0005886 0.36 plasma membrane
EAND.evm.TU.Chr10.1856 GO:0016324 0.36 apical plasma membrane
EAND.evm.TU.ctg2940.1 GO:0000122 0.42 negative regulation of transcription by RNA polymerase II
EAND.evm.TU.ctg2940.1 GO:0007179 0.42 transforming growth factor beta receptor signaling pathway
EAND.evm.TU.ctg2940.1 GO:0008340 0.42 determination of adult lifespan
EAND.evm.TU.ctg2940.1 GO:0009653 0.42 anatomical structure morphogenesis
EAND.evm.TU.ctg2940.1 GO:0018991 0.42 oviposition
EAND.evm.TU.ctg2940.1 GO:0030154 0.42 cell differentiation
EAND.evm.TU.ctg2940.1 GO:0030509 0.42 BMP signaling pathway
EAND.evm.TU.ctg2940.1 GO:0040024 0.42 dauer larval development
EAND.evm.TU.ctg2940.1 GO:0043053 0.42 dauer entry
EAND.evm.TU.ctg2940.1 GO:0043476 0.42 pigment accumulation
EAND.evm.TU.ctg2940.1 GO:0045944 0.42 positive regulation of transcription by RNA polymerase II
EAND.evm.TU.ctg2940.1 GO:0050829 0.42 defense response to Gram-negative bacterium
EAND.evm.TU.ctg2940.1 GO:0060395 0.42 SMAD protein signal transduction
EAND.evm.TU.ctg2940.1 GO:0061067 0.42 negative regulation of dauer larval development
EAND.evm.TU.ctg2940.1 GO:0000978 0.42 RNA polymerase II cis-regulatory region sequence-specific DNA binding
EAND.evm.TU.ctg2940.1 GO:0000981 0.42 DNA-binding transcription factor activity, RNA polymerase II-specific
EAND.evm.TU.ctg2940.1 GO:0046872 0.42 metal ion binding
EAND.evm.TU.ctg2940.1 GO:0061629 0.42 RNA polymerase II-specific DNA-binding transcription factor binding
EAND.evm.TU.ctg2940.1 GO:0070411 0.42 I-SMAD binding
EAND.evm.TU.ctg2940.1 GO:0005634 0.42 nucleus
EAND.evm.TU.ctg2940.1 GO:0005737 0.42 cytoplasm
EAND.evm.TU.ctg2940.1 GO:0005829 0.42 cytosol
EAND.evm.TU.ctg2940.1 GO:0071144 0.42 heteromeric SMAD protein complex
