# Supplementary material for: A punctuated burst of massive genomic rearrangements by chromosome shattering and the origin of non-marine annelids
Source: Research Square preprint supplement (doi:10.21203/rs.3.rs-4346819/v1), 2024-05-21
Supplement: Supplementary file 3 [file c62e546a070f1fe8eaf8006d.xlsx]

## Sheet: Sheet1
Supplementary Table 5. List of species, acronyms and data source for all datasets included in this study.
Species name	Whole Genome Synteny	3D Genome conformation	Hox genes	TE annotation	GRE	Whole Genome Alignment (progressiveCactus)	Phylum	Class	Order	Family	Acronym	Common name	Habitat	Data type	Genome size (Mbp)	Haploid karyotype (n)	Complete + Fragmented (C+F) BUSCO	Number of genes	Reference	SRA (HiC data)
Alitta virens	NO	NO	NO	NO	YES	NO	Annelida	Polychaeta	Phyllodocida	Nereididae	AVIR1		Marine	Transcriptome	-	-	95.3	36610	MATEdb2	-
Alitta virens	NO	NO	NO	NO	NO	YES	Annelida	Polychaeta	Phyllodocida	Nereididae	AVIR	King ragworm	Marine	Genome	671	14	-	-	GCA_932294295.1	-
Amphiduros pacificus	NO	NO	NO	NO	NO	YES	Annelida	Polychaeta	Phyllodocida	Hesionidae	APAC		Marine	Genome	694	13	-	-	GCA_949316495.1	-
Arenicola marina	NO	NO	NO	NO	YES	NO	Annelida	Polychaeta	-	Arenicolidae	COCO2		Marine	Transcriptome ref. DGE	-	-	99		This project	-
Aulodrilus japonicus	NO	NO	NO	NO	YES	NO	Annelida	Clitellata	Tubificida	Naididae	AUJA1		Freshwater	Transcriptome	-	-	91	20452	MATEdb2	-
Capitella teleta	NO	NO	NO	NO	YES	NO	Annelida	Polychaeta	-	Capitellidae	CTEL		Marine	Genome	333	10	97.5	31977	MATEdb2	-
Carpetania matritensis	YES	NO	YES	YES	YES	YES	Annelida	Clitellata	Crassiclitellata	Hormogastridae	CMAT		Terrestrial	Genome	588	17	90.3	37980	This project	-
Cirratulus cirratus	NO	NO	NO	NO	YES	NO	Annelida	Polychaeta	Terebellida	Cirratulidae	CCIR1		Marine	Transcriptome	-	-	94.8	37282	MATEdb2	-
Drosophila melanogaster	NO	YES	NO	NO	NO	NO	Arthropoda	Insecta	Diptera	Drosophilidae	-	-	Terrestrial	Genome	180	4	-	-	GCA_000001215.4	GSE136137
Eisenia andrei	YES	NO	YES	YES	YES	YES	Annelida	Clitellata	Crassiclitellata	Lumbricidae	EAND		Terrestrial	Genome	1315	11	91.9	31817	Shao et al., 2020	-
Enchytraeus crypticus	YES	NO	YES	YES	YES	NO	Annelida	Clitellata	Enchytraeida	Enchytraeidae	ECRY		Terrestrial	Genome	525	-	90.1	16424	Amorim et al., 2021	-
Gallus gallus	NO	YES	NO	NO	NO	NO	Chordata	Aves	Galliformes	Phasianidae	-	-	Terrestrial	Genome	1090	33	-	-	GCA_016699485.1	GSE96037, http://icg.nsc.ru/ontogen/
Hermodice carunculata	NO	NO	NO	NO	YES	NO	Annelida	Polychaeta	Amphinomida	Amphinomidae	HCAR1		Marine	Transcriptome	-	-	97.3	36041	MATEdb2	-
Hirudinaria manillensis	YES	YES	YES	YES	YES	YES	Annelida	Clitellata	Arhynchobdellida	Hirudinidae	HMAN	Asian buffalo leech	Freshwater	Genome	157	13	91.5	18096	Zheng et al., 2023	SRR15881149
Hirudo medicinalis	NO	NO	NO	NO	YES	NO	Annelida	Clitellata	Arhynchobdellida	Hirudinidae	HMED2		Freshwater	Transcriptome ref. DGE	-	-	98.3		This project	-
Hirudo nipponia	YES	NO	YES	YES	YES	YES	Annelida	Clitellata	Arhynchobdellida	Hirudinidae	HNIP	Korean blood-sucking leech	Freshwater	Genome	204	11	93.2	20421	Zheng et al., 2023	-
Hypania invalida	NO	NO	NO	NO	YES	NO	Annelida	Polychaeta	Terebellida	Ampharetidae	HINV1		Marine	Transcriptome	-	-	96.7	23068	MATEdb2	-
Laetmonice cf. iocasica	NO	NO	NO	NO	YES	NO	Annelida	Polychaeta	Phyllodocida	Aphroditidae	LIOC1		Marine	Transcriptome	-	-	94.9	20243	MATEdb2	-
Leitoscoloplos robustus	NO	NO	NO	NO	YES	NO	Annelida	Polychaeta	Orbiniida	Orbiniidae	LROB1		Marine	Transcriptome	-	-	89.2	34056	MATEdb2	-
Lepidonotopodium sp.	NO	NO	NO	NO	YES	NO	Annelida	Polychaeta	Phyllodocida	Polynoidae	LEYZ1		Marine	Transcriptome	-	-	95.2	26564	MATEdb2	-
Lineus longissimus	YES	NO	YES	YES	YES	YES	Nemertea	Pilidiophora	Heteronemertea	Lineidae	LLON	Bootlace worm	Marine	Genome	391	19	99	19782	Kwiatkowski et al., 2021	-
Lumbricus terrestris	NO	NO	NO	NO	NO	YES	Annelida	Clitellata	Crassiclitellata	Lumbricidae	LTER	Common earthworm	Terrestrial	Genome	1057	18	-	-	GCA_949752735.1	-
Magelona pitelkai	NO	NO	NO	NO	YES	NO	Annelida	Polychaeta	-	Magelonidae	MPIT1		Marine	Transcriptome	-	-	81.8	24912	MATEdb2	-
Mesochaetopterus minutus	NO	NO	NO	NO	YES	NO	Annelida	Polychaeta	-	Chaetopteridae	MMIN1		Marine	Transcriptome	-	-	94.7	29673	MATEdb2	-
Metaphire vulgaris	YES	NO	YES	YES	YES	YES	Annelida	Clitellata	Crassiclitellata	Megascolecidae	MVUL		Terrestrial	Genome	729	41	91.4	50239	Jin et al., 2020	-
Neoamphitrite robusta	NO	NO	NO	NO	YES	NO	Annelida	Polychaeta	Terebellida	Terebellidae	NROB1		Marine	Transcriptome	-	-	95.5	31029	MATEdb2	-
Norana najaformis	YES	YES	YES	YES	YES	YES	Annelida	Clitellata	Crassiclitellata	Hormogastridae	NNAJ	Catalan giant earthworm	Terrestrial	Genome	608	17	95.7	46842	This project	This project
Ophryotrocha xiamen	NO	NO	NO	NO	YES	NO	Annelida	Polychaeta	Eunicida	Dorvilleidae	OXIA1		Marine	Transcriptome	-	-	94.8	27464	MATEdb2	-
Owenia fusiformis	YES	NO	YES	YES	YES	YES	Annelida	Polychaeta	-	Oweniidae	OFUS		Marine	Genome	500	12	97.4	26679	Martín-Zamora et al., 2023	-
Paraescarpia echinospica	YES	YES	YES	YES	YES	YES	Annelida	Polychaeta	Sabellida	Siboglinidae	PECH		Marine	Genome	1102	14	88.4	22642	Sun et al., 2021	SRR15733960
Parvidrilus meyssonnieri	NO	NO	NO	NO	YES	NO	Annelida	Clitellata	Parvidrilida	Parvidrilidae	PMEY1		Freshwater	Transcriptome	-	-	82.7	20341	MATEdb2	-
Pecten maximus	YES	NO	YES	YES	YES	YES	Mollusca	Bivalvia	Pectinida	Pectinidae	PMAX	King scallop	Marine	Genome	918	19	98.7	26152	Kenny et al., 2020	-
Pelodrilus sp.	NO	NO	NO	NO	YES	NO	Annelida	Clitellata	Haplotaxida	Haplotaxidae	PELO1		Freshwater	Transcriptome			81.9	21991	MATEdb2	-
Phreodrilidae sp.	NO	NO	NO	NO	YES	NO	Annelida	Clitellata	Tubificida	Phreodrilidae	PHRE1		Freshwater	Transcriptome	-	-	86.8	26799	MATEdb2	-
Propappus volki	NO	NO	NO	NO	YES	NO	Annelida	Clitellata	Enchytraeida	Propappidae	PVOL1		Freshwater	Transcriptome	-	-	79.3	23557	MATEdb2	-
Protula sp. h YS-2021	NO	NO	NO	NO	NO	YES	Annelida	Polychaeta	Sabellida	Serpulidae	PROT		Marine	Genome	864	11	-	-	GCA_949752745.1	-
Randiella sp.	NO	NO	NO	NO	YES	NO	Annelida	Clitellata	Randiellida	Randiellidae	RAND1		Marine	Transcriptome	-	-	90.8	39892	MATEdb2	-
Sipunculus nudus	YES	NO	YES	YES	NO	YES	Annelida	Polychaeta	Sipuncula	Sipunculidae	SNUD	Peanut worm	Marine	Genome	1427	17	96.7	28749	Zheng et al., 2023	-
Sipunculus nudus	NO	NO	NO	NO	YES	NO	Annelida	Polychaeta	Sipuncula	Sipunculidae	SNUD1		Marine	Transcriptome	-	-	96	34159	MATEdb2	-
Streblospio benedicti	YES	NO	YES	YES	YES	YES	Annelida	Polychaeta	Spionida	Spionidae	SBEN		Marine	Genome	701	11	65.8	20221	Zakas et al., 2022	-
Syllis gracilis	NO	NO	NO	NO	YES	NO	Annelida	Polychaeta	Phyllodocida	Syllidae	SYGR1		Marine	Transcriptome	-	-	94.4	43214	MATEdb2	-
Terebella lapidaria	NO	YES	NO	YES	NO	YES	Annelida	Polychaeta	Terebellida	Terebellidae	TLAP		Marine	Genome	765	16	-	-	GCA_949152475.1	ERR10851521
Thoracophelia mucronata	NO	NO	NO	NO	YES	NO	Annelida	Polychaeta	-	Opheliidae	TMUC1		Marine	Transcriptome	-	-	86.7	27780	MATEdb2	-
Trichodrilus strandi	NO	NO	NO	NO	YES	NO	Annelida	Clitellata	Lumbriculida	Lumbriculidae	TSTR1		Freshwater	Transcriptome	-	-	82.5	25795	MATEdb2	-
Whitmania pigra	YES	NO	YES	YES	YES	YES	Annelida	Clitellata	Arhynchobdellida	Haemopidae	WPIG		Freshwater	Genome	181	11	94.1	18518	Zheng et al., 2023	-
