# Supplementary material for: A punctuated burst of massive genomic rearrangements by chromosome shattering and the origin of non-marine annelids
Source: Research Square preprint supplement (doi:10.21203/rs.3.rs-4346819/v1), 2024-05-21

**Supplementary Data 2.** Ks plot for the different retained gene duplicate pairs which originated on different nodes, indicative of whole genome duplication events. From left to right, from up to down, (1) the node including Clitellata and its closest common ancestor, (2). the node of Clitellata, (3) the node which includes leeches and earthworms, (4) the node which includes only earthworms (Crassiciitellata). Each species is represented with a different colour.

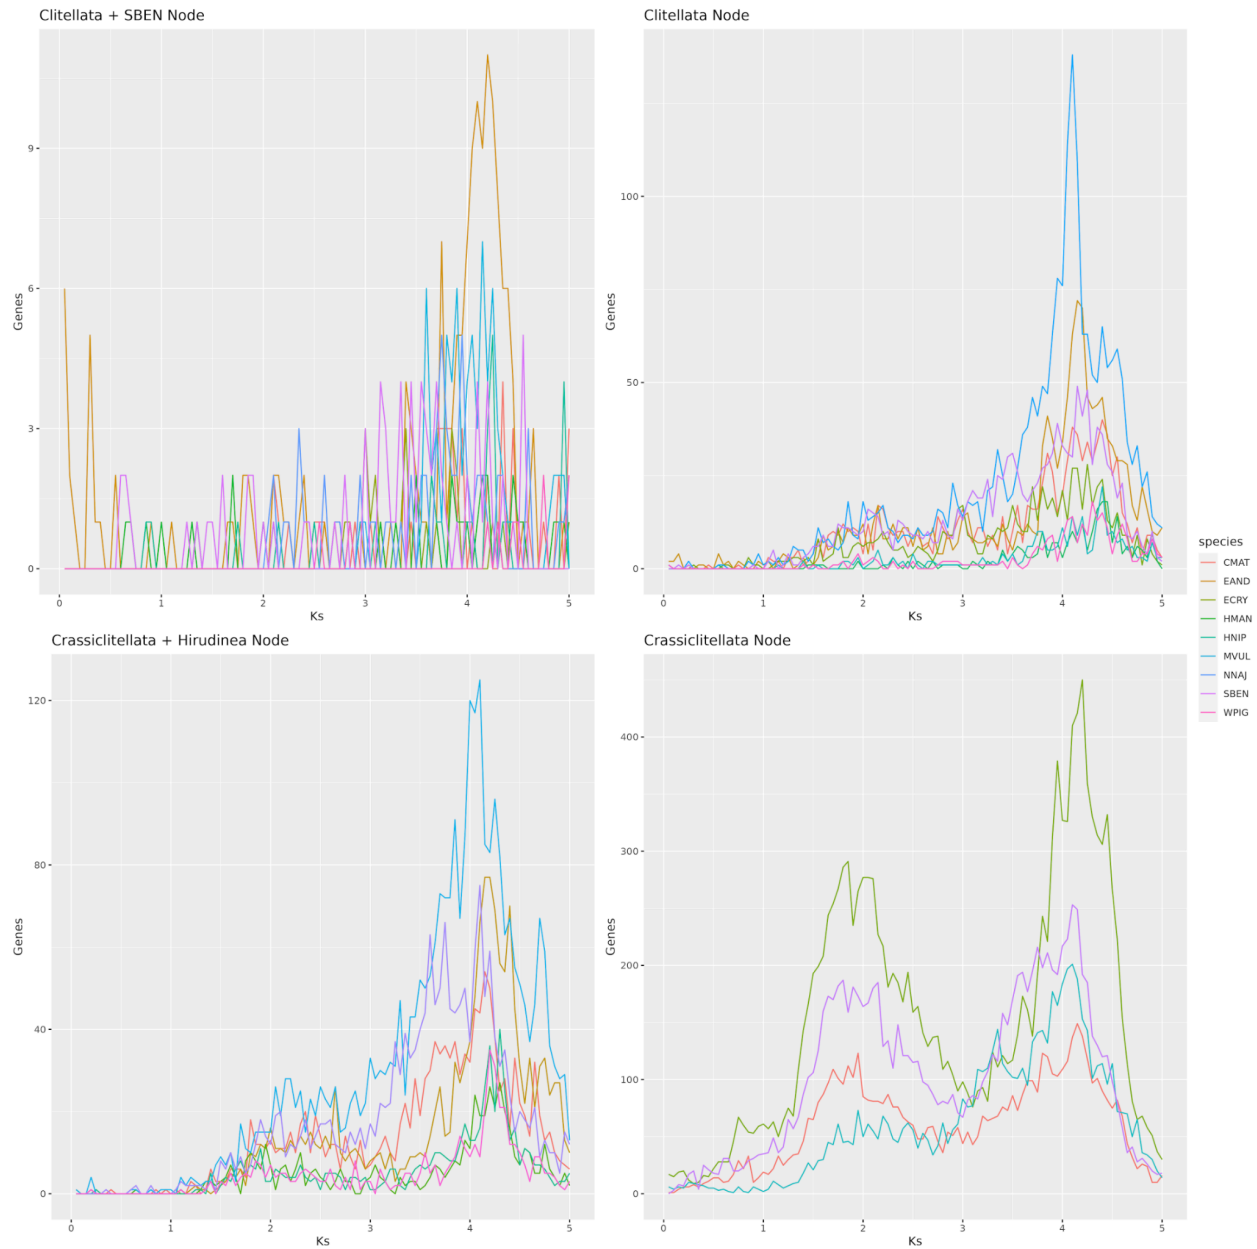

Supplement: Supplementary file 4 [file 5547c241740c31f78e02b57c.pdf]
