# Supplementary material for: A punctuated burst of massive genomic rearrangements by chromosome shattering and the origin of non-marine annelids
Source: Research Square preprint supplement (doi:10.21203/rs.3.rs-4346819/v1), 2024-05-21
Supplement: Supplementary file 4 [file cc029b5c9be2d68bbe3133e6.xlsx]

## Sheet: Sheet1
Supplementary Table 2. Summary of the progressiveCactus alignment using halStats. Anc08 corresponds to the ancestor of SBEN and Clitellata (see also github repository for the full output, including a phylogenetic tree with the numbering of all nodes).
GenomeName	Length (bp)	NumSequences
Anc00	6968383	336
LLON	391165532	30
Anc01	9354720	726
PMAX	918306378	3983
Anc02	8428287	649
OFUS	499544331	819
Anc03	18049992	767
SNUD	1426776566	155
Anc04	7879605	1377
Anc05	21113912	2211
AVIR	671169925	25
APAC	694348774	33
Anc06	6645459	1148
Anc07	15005454	973
PECH	1101813147	6463
PROT	863502773	221
Anc08	9378039	1139
SBEN	701454808	6112
Anc09	13708898	774
TLAP	765247992	577
Anc10	11531700	1749
Anc11	91778855	629
HMAN	157359359	418
Anc13	134489362	1133
WPIG	181301143	307
HNIP	204198878	525
Anc12	50666760	2257
Anc14	465902858	8560
MVUL	728619257	280
ACOR	1285166759	1042
Anc15	159978530	972
Anc16	268957771	2903
EAND	1315326768	3633
LTER	1056547181	362
Anc17	316598419	1924
CMAT	588434832	17
NNAJ	608422863	17
