# Supplementary material for: A punctuated burst of massive genomic rearrangements by chromosome shattering and the origin of non-marine annelids
Source: Research Square preprint supplement (doi:10.21203/rs.3.rs-4346819/v1), 2024-05-21
Supplement: Supplementary file 5 [file f4af1727a14f6f6b82fb5de7.xlsx]

## Sheet: BCnS_LGs
Supplementary Table 1. Pairwise p-values between the four sets of linkage groups and the chromosomes of each species using Fisher's exact test. The p-values were corrected using the Benjamini-Hochberg procedure.
	J2_L	D	B2	K_O2	F	B3	J1	H_Q	E	A2	A1	N	I	O1_R	B1	P	C2	M	G	C1
CMAT.chr_1	0.781694	0.948008	1	0.971043	0.998254	0.948065	0.925591	0.812821	0.940234	1	0.903305	0.961621	0.812828	0.96406	0.608387	0.738499	1	0.884299	0.888335	0.95875
CMAT.chr_2	0.804508	0.948008	1	0.630644	0.346371	0.948065	0.925591	0.821069	0.963909	1	0.903305	0.961621	0.980091	0.956454	1	0.993518	1	0.866713	0.888335	0.95875
CMAT.chr_3	0.990587	0.00704857	0.407398	0.971043	0.947856	0.940912	0.836971	0.979152	0.940234	0.739097	0.923894	0.828167	0.998832	0.963225	1	0.993518	1	0.866713	0.994038	0.988979
CMAT.chr_4	0.990587	0.948008	1	0.484999	0.998254	0.948065	0.925591	0.821069	0.940234	1	0.903305	0.828167	0.998832	0.956454	1	0.993518	1	0.606704	0.888335	0.95875
CMAT.chr_5	0.990587	0.948008	1	0.0615217	0.998254	0.948065	0.836971	0.979152	0.940234	1	0.903305	0.961621	0.998832	0.96406	0.367126	0.644475	1	0.997684	0.888335	0.245408
CMAT.chr_6	0.781694	0.948008	1	0.971043	0.998254	0.921364	0.925591	0.979152	0.940234	1	0.903305	0.961621	0.998832	0.956454	0.936409	0.738499	1	0.884299	0.888335	0.95875
CMAT.chr_7	0.781694	0.85483	1	0.971043	0.998254	0.948065	0.907059	0.979152	0.940234	1	0.985638	0.961621	0.723624	0.963225	1	0.644475	1	0.866713	0.888335	0.988979
CMAT.chr_8	0.781694	0.948008	1	0.971043	0.249951	0.948065	0.857732	0.979152	0.940234	1	0.903305	0.961621	0.980091	0.993616	1	0.738499	1	0.884299	0.888335	0.95875
CMAT.chr_9	0.851237	0.948008	1	0.971043	0.998254	0.258669	0.836971	0.979152	0.850876	1	0.903305	0.835632	0.723624	0.956454	1	0.993518	1	0.997684	0.888335	0.988979
CMAT.chr_10	0.781694	0.948008	0.573928	0.971043	0.998254	0.948065	0.925591	0.979152	0.940234	1	0.903305	0.999206	0.998832	0.956454	0.634641	0.993518	0.358928	0.997684	0.888335	0.95875
CMAT.chr_11	0.990587	0.948008	1	0.971043	0.249951	0.948065	0.925591	0.979152	0.940234	0.284265	0.99798	0.953292	0.984355	0.956454	1	0.644475	1	0.866713	0.888335	0.313611
CMAT.chr_12	0.990587	0.948008	1	0.971043	0.998254	0.948065	0.925591	0.199727	0.287112	1	0.903305	0.828167	0.919658	0.956454	0.710447	0.993518	1	0.997684	0.888335	0.95875
CMAT.chr_13	0.851237	0.948008	1	0.484999	0.998254	0.948065	0.925591	0.979152	0.940234	1	0.903305	0.953292	0.812828	0.956454	0.0464626	0.738499	1	0.997684	0.888335	0.988979
CMAT.chr_14	0.804508	0.948008	1	0.971043	0.947856	0.948065	0.925591	0.812821	0.940234	0.779934	0.396992	0.961621	0.723624	0.96406	1	0.993518	1	0.997684	0.888335	0.988979
CMAT.chr_15	0.990587	0.948008	1	0.971043	0.998254	0.948065	0.857732	0.979152	0.940234	0.739097	0.99798	0.828167	0.812828	0.96406	1	0.738499	1	0.884299	0.888335	0.245408
CMAT.chr_16	0.990587	0.948008	1	0.630644	0.998254	0.948065	0.925591	0.979152	0.940234	1	0.99798	0.828167	0.36393	0.96406	0.0464626	0.993518	0.358928	0.678976	0.888335	0.988979
CMAT.chr_17	0.853508	0.85483	1	0.886757	0.998254	0.921364	0.857732	0.979152	0.940234	1	0.99798	0.828167	0.998832	1	1	0.0853916	0.358928	0.606704	0.888335	0.95875
EAND.GWHACBE00000001	0.973092	0.964287	0.670132	0.295853	0.967752	0.99285	0.984908	0.977591	0.867783	0.957442	0.904842	0.993249	0.998754	0.665341	0.984666	0.421382	0.386786	0.863907	0.866668	0.695283
EAND.GWHACBE00000002	0.0544743	0.067322	0.161759	0.901406	0.967752	0.99285	0.984908	0.42476	0.867783	0.957442	0.904842	0.918533	0.998754	0.932413	0.984666	0.987063	0.99624	0.863907	1	0.806827
EAND.GWHACBE00000003	0.973092	0.964287	0.999477	0.901406	0.00589107	0.99285	0.984908	0.42476	0.996681	0.957442	0.904842	0.905428	0.49068	0.992519	0.448341	0.421382	0.99624	0.863907	0.753887	0.695283
EAND.GWHACBE00000004	0.973092	0.964287	0.316472	0.901406	0.967752	0.027894	0.984908	0.977591	0.867783	0.931036	0.904842	0.918533	0.228408	0.932413	0.984666	0.988558	0.937606	0.863907	1	0.695283
EAND.GWHACBE00000005	0.0544743	0.964287	0.80897	0.901406	0.216804	0.99285	0.984908	0.977591	0.867783	0.957442	0.904842	0.918533	0.998754	0.932413	0.984666	0.988558	0.386786	0.863907	1	0.695283
EAND.GWHACBE00000006	0.973092	0.964287	0.999477	0.901406	0.967752	0.99285	0.203553	0.977591	0.996681	0.0828981	0.460699	0.413531	0.224868	0.932413	0.63709	0.988558	0.99624	0.863907	1	0.949197
EAND.GWHACBE00000007	0.973092	0.61356	0.670132	0.901406	0.967752	0.914469	0.984908	0.977591	0.996681	0.957442	0.904842	0.440131	0.998754	0.932413	0.700934	0.987063	0.677202	0.863907	0.753887	0.806827
EAND.GWHACBE00000008	0.973092	0.981189	0.999477	0.901406	0.967752	0.99285	0.203553	0.42476	0.0366842	0.957442	0.904842	0.993249	0.624556	0.932413	0.448341	0.987063	0.386786	0.863907	0.665279	0.949197
EAND.GWHACBE00000009	0.973092	0.964287	0.670132	0.901406	0.967752	0.698467	0.399638	0.977591	0.996681	0.957442	0.904842	0.918533	0.998754	0.665341	0.133962	0.987063	0.99624	0.863907	1	0.949197
EAND.GWHACBE00000010	0.973092	0.964287	0.670132	0.901406	0.967752	0.99285	0.984908	0.977591	0.996681	0.957442	1	0.413531	0.49068	1	0.789335	0.421382	0.386786	0.863907	1	0.695283
EAND.GWHACBE00000011	0.973092	0.964287	0.670132	0.901406	0.967752	0.698467	0.82283	0.977591	0.867783	0.957442	0.904842	0.90771	0.998754	0.932413	0.984666	0.987063	0.386786	0.863907	0.614079	0.695283
ECRY.scf7180000024016.6106231	1	1	1	1	1	1	1	1	1	1	1	1	0.326169	1	1	1	1	1	1	1
ECRY.scf7180000024043.1468058	1	1	1	1	1	1	1	1	0.179282	1	1	1	0.655919	1	1	1	1	1	1	1
ECRY.scf7180000023970.4582792	1	1	1	1	1	1	1	1	1	0.899427	1	1	1	1	1	1	1	1	1	1
ECRY.scf7180000024048.3904504	0.374423	1	1	1	1	1	1	1	1	1	1	1	1	1	1	1	1	1	1	1
ECRY.scf7180000023901.4321316	1	1	1	1	1	1	1	1	1	1	1	1	1	1	1	1	1	1	1	1
ECRY.scf7180000024041.5477867	1	1	1	1	1	1	1	1	1	1	1	0.836506	1	1	1	1	1	1	0.799458	1
ECRY.scf7180000023961.622029	1	1	1	1	1	1	1	1	1	1	1	1	1	1	1	1	1	1	1	1
ECRY.scf7180000023746.4027801	1	1	1	1	0.205861	1	1	1	1	1	1	1	1	1	1	1	1	1	1	1
ECRY.scf7180000023433.77741	1	1	1	1	1	1	1	1	1	1	1	0.658601	1	1	1	1	1	1	1	1
ECRY.scf7180000023648.3685046	1	1	1	1	1	1	1	1	1	1	1	0.754915	0.994527	1	1	1	1	1	1	1
ECRY.scf7180000023637.2435755	1	1	1	1	1	1	1	1	1	1	1	1	1	1	1	1	1	1	1	1
ECRY.scf7180000024040.1232157	1	1	1	1	1	1	1	1	1	1	1	1	1	1	1	1	1	1	1	1
ECRY.scf7180000023952.3473064	1	1	1	1	1	1	1	1	1	1	1	1	0.655919	1	1	1	1	1	1	1
ECRY.scf7180000023630.3359036	1	1	1	1	1	1	0.822214	1	1	1	1	1	1	1	1	1	1	1	0.88743	1
ECRY.scf7180000023750.3372389	1	1	1	1	1	1	1	0.594577	1	1	1	1	1	1	1	1	1	1	1	1
ECRY.scf7180000023670.2275729	1	1	1	1	1	1	1	1	1	1	1	1	1	1	1	1	1	1	0.922293	1
ECRY.scf7180000023724.3213358	1	0.488147	1	1	1	1	1	1	1	1	1	0.836506	1	1	1	1	1	1	1	1
ECRY.scf7180000024022.3207392	1	1	1	1	1	1	1	1	1	1	1	1	1	1	1	1	1	1	0.88743	1
ECRY.scf7180000023771.2162011	0.849802	1	1	1	1	1	0.822214	1	1	1	1	1	1	1	1	1	1	1	1	1
ECRY.scf7180000023809.1888596	1	1	1	1	1	1	1	1	1	1	1	1	1	1	1	1	1	1	1	1
ECRY.scf7180000023730.3122031	1	1	1	1	1	1	1	1	1	1	1	1	1	1	1	1	1	1	0.88743	1
ECRY.scf7180000023751.1365616	1	0.625394	1	1	1	1	0.865187	1	1	1	1	0.658601	1	1	1	1	1	1	1	1
ECRY.scf7180000023949.2978466	1	1	1	1	1	1	1	1	1	1	1	0.658601	1	1	1	1	1	1	1	1
ECRY.scf7180000023782.2982715	1	1	1	1	1	1	0.822214	1	1	1	1	1	1	1	1	1	1	0.632911	0.88743	1
ECRY.scf7180000023690.3279956	1	1	1	1	1	1	1	1	1	1	1	1	1	1	1	1	1	1	1	1
ECRY.scf7180000023727.1057424	1	1	1	1	1	1	1	1	1	1	1	0.878978	1	1	1	1	1	1	1	1
ECRY.scf7180000023262.31072	1	0.196929	1	0.957561	1	1	1	1	1	1	1	1	1	1	1	1	1	1	1	1
ECRY.scf7180000023623.336459	1	1	1	1	1	1	0.9487	1	1	1	1	1	1	1	1	1	1	1	0.501101	1
ECRY.scf7180000023742.962986	1	1	1	1	1	1	1	1	1	1	1	1	1	1	1	1	1	1	1	1
ECRY.scf7180000023623.5591261	0.436154	1	1	1	1	1	1	1	1	1	1	1	1	1	1	1	1	1	1	1
ECRY.scf7180000023624.2659075	1	1	1	0.901083	1	1	1	1	1	1	1	1	1	1	1	1	1	0.632911	1	1
ECRY.scf7180000023622.564893	1	1	1	1	1	1	1	1	1	1	1	1	1	1	1	1	1	1	1	1
ECRY.scf7180000023654.243390	1	1	1	0.0003045	1	1	1	1	1	1	1	1	1	1	1	1	1	0.632911	1	1
ECRY.scf7180000023738.2603014	0.849802	1	1	1	1	1	1	1	1	1	1	1	1	1	0.455062	1	1	1	1	1
ECRY.scf7180000023647.1063006	1	0.494182	1	1	1	1	0.822214	1	1	1	1	1	0.655919	1	1	1	1	1	1	1
ECRY.scf7180000023987.2172811	1	1	1	1	1	1	0.822214	1	1	0.899427	1	1	1	1	1	1	1	1	1	1
ECRY.scf7180000023764.2523689	1	1	1	1	1	1	1	1	1	1	1	1	1	1	1	1	1	1	1	1
ECRY.scf7180000023661.2563741	1	1	1	1	1	1	1	1	1	1	1	1	1	1	1	1	1	1	1	1
ECRY.scf7180000024005.2551396	1	0.196929	1	0.212534	1	1	1	1	1	1	1	1	1	1	1	1	1	1	1	1
ECRY.scf7180000023965.3892078	1	1	1	1	1	1	1	1	1	1	1	1	1	1	1	1	1	1	0.88743	1
ECRY.scf7180000023704.2061584	1	1	1	1	1	1	1	1	1	1	1	1	1	1	1	1	1	1	0.88743	1
ECRY.scf7180000023747.1915408	1	1	1	1	1	1	1	1	1	1	1	0.658601	1	1	1	1	1	1	1	1
ECRY.scf7180000023768.2185744	1	1	1	1	1	1	1	1	1	1	1	1	1	1	1	1	1	1	1	1
ECRY.scf7180000023650.2413482	1	1	1	1	1	1	1	1	0.31288	1	1	1	1	1	1	1	1	1	1	1
ECRY.scf7180000023669.2531915	1	1	1	0.901083	1	1	1	1	1	1	1	0.825051	1	1	1	1	1	1	1	1
ECRY.scf7180000023745.1975086	1	1	1	1	1	1	1	1	1	1	1	1	1	1	1	1	1	1	1	1
ECRY.scf7180000023792.1757689	1	1	1	1	1	1	1	1	1	1	1	1	0.326169	1	1	1	1	1	1	1
ECRY.scf7180000024023.2323017	1	1	1	1	1	1	0.822214	1	1	1	1	1	1	1	1	1	1	1	0.88743	1
ECRY.scf7180000023977.581247	1	0.625394	1	1	1	1	0.908931	1	1	1	1	1	1	1	1	1	1	1	1	1
ECRY.scf7180000023657.2288772	1	1	1	0.666915	1	1	1	1	1	1	1	1	1	1	1	1	1	1	1	1
ECRY.scf7180000023626.2277328	1	1	1	1	1	1	1	1	1	1	1	1	0.655919	1	1	1	1	1	1	1
ECRY.scf7180000023432.307514	0.849802	1	1	1	0.675866	1	1	0.215841	1	1	1	1	1	1	1	1	1	1	1	1
ECRY.scf7180000024042.1575494	1	1	1	0.901083	1	1	1	1	1	1	1	1	1	1	1	1	1	1	1	1
ECRY.scf7180000023641.2187235	1	0.494182	1	1	1	1	1	1	1	1	1	1	1	1	1	1	1	1	1	1
ECRY.scf7180000023697.2107495	1	1	1	1	1	1	1	1	1	1	1	1	1	1	1	1	1	1	0.88743	1
ECRY.scf7180000023649.769389	1	1	1	1	1	1	1	1	0.0892439	1	1	1	1	1	1	1	1	1	1	1
ECRY.scf7180000023725.3537867	1	0.625394	1	1	1	1	1	1	1	1	1	1	1	1	1	1	1	1	0.922293	1
ECRY.scf7180000023265.169033	1	1	1	1	1	1	1	1	1	1	1	1	1	1	1	1	1	1	1	1
HMAN.Chr2	0.572407	0.999695	0.901875	0.88712	0.996326	1	0.909885	0.0726002	0.383526	0.836226	0.838332	0.919903	0.15377	0.980783	0.984159	1	0.995968	0.156974	0.937571	0.965181
HMAN.Chr1	0.993616	0.774322	0.257748	0.869155	0.863787	1	0.909885	0.944395	1	0.520792	0.838332	0.919903	0.997133	0.980783	0.913106	0.513511	0.995968	0.841177	0.188155	0.965181
HMAN.Chr3	0.572407	0.999695	0.901875	0.992765	0.248807	0.583692	0.909885	0.944395	0.556583	0.998806	0.838332	0.864683	0.890012	0.479425	0.913106	1	0.995968	0.873015	0.937571	0.965181
HMAN.Chr4	0.572407	0.603836	0.257748	0.88712	0.863787	0.702681	0.879492	0.944395	1	0.998806	0.942333	0.864683	0.997133	0.980783	0.984159	1	0.0882147	0.996637	0.937571	0.965181
HMAN.Chr5	0.993616	0.932261	0.905669	0.88712	0.863787	0.702681	0.656354	0.944395	1	0.836226	0.838332	0.919903	0.890012	0.479425	0.984159	1	0.961855	0.996637	0.937571	0.965181
HMAN.Chr6	0.993616	0.603836	0.901875	0.88712	0.863787	0.914313	0.909885	0.944395	1	0.998806	0.838332	0.864683	0.29385	0.980783	0.798542	1	0.995968	0.996637	0.202406	0.965181
HMAN.Chr7	0.572407	0.603836	0.901875	0.876394	0.863787	0.844885	0.909885	0.944395	1	0.836226	0.838332	0.919903	0.997133	0.980783	0.798542	0.215238	0.995968	0.996637	0.937571	0.965181
HMAN.Chr8	0.572407	0.782439	0.901875	0.88712	0.792108	1	0.909885	0.944395	1	0.0497593	0.838332	0.919903	0.997133	0.826257	0.984159	1	0.995968	0.996637	0.937571	0.965181
HMAN.Chr9	0.993616	0.999695	0.901875	0.88712	0.863787	1	0.879492	0.944395	1	0.836226	0.838332	0.864683	0.15377	0.909129	0.984159	1	0.961855	0.996637	0.937571	0.965181
HMAN.Chr10	0.572407	0.603836	0.901875	0.997597	0.863787	1	0.909885	0.944395	0.822393	0.836226	0.838332	0.864683	0.997133	0.479425	0.984159	1	0.0773998	0.156974	0.937571	0.965181
HMAN.Chr11	0.993616	0.999695	0.901875	0.876394	0.979882	0.702681	0.879492	0.944395	1	0.998806	0.838332	0.919903	0.15377	0.479425	0.798542	1	0.945011	0.996637	0.937571	0.965181
HMAN.Chr12	0.993616	0.774322	0.901875	0.869155	0.792108	0.844885	0.909885	0.944395	0.556583	0.836226	0.838332	0.864683	0.997133	0.980783	0.984159	1	0.995968	0.996637	0.937571	0.965181
HMAN.Chr13	0.572407	0.79805	0.901875	0.997597	0.863787	1	0.909885	0.944395	0.556583	0.998806	0.838332	0.919903	0.997133	0.909129	0.913106	1	0.0773998	0.996637	0.188155	0.0706157
HNIP.Chr1	0.476344	0.999086	0.896103	1	0.897646	0.261802	0.952228	0.970906	0.927192	0.965313	0.644824	0.216267	0.953822	0.943275	1	0.95967	0.903441	0.966675	0.866169	0.344695
HNIP.Chr2	0.795967	0.679403	0.969857	0.83701	0.897646	0.993971	0.700935	0.970906	0.397061	0.713684	0.941101	0.996472	0.953822	0.737259	1	0.95967	0.903441	0.966675	0.866169	0.344695
HNIP.Chr3	0.722543	0.999086	0.969857	0.633801	0.935185	0.523918	0.952228	0.997772	0.927192	0.713684	0.644824	0.0042094	0.953822	0.737259	1	0.952879	0.903441	0.966675	0.866169	0.999633
HNIP.Chr4	0.996822	0.886871	0.969857	0.955178	0.242323	0.0120128	0.404625	0.413782	0.927192	0.965313	0.644824	0.996472	0.953822	0.943275	1	0.788798	0.903441	0.966675	0.925502	0.999633
HNIP.Chr5	0.999458	0.999086	0.969857	0.955178	0.764584	0.993971	0.952228	0.831028	0.307303	0.0373689	0.980436	0.996472	0.953822	0.943275	0.386201	0.952879	0.731932	0.314416	0.866169	0.999633
HNIP.Chr6	0.562884	0.395171	0.0316034	0.35089	0.935185	0.993971	0.952228	0.997772	0.927192	0.965313	0.644824	0.996472	0.953822	0.943275	1	0.788798	0.903441	0.966675	0.866169	0.812636
HNIP.Chr7	0.562884	0.395171	0.969857	1	0.935185	0.993971	0.404625	0.831028	0.927192	0.965313	0.941101	0.996472	0.953822	0.943275	1	0.952879	0.903441	0.500584	0.925502	0.812636
HNIP.Chr8	0.999458	0.911754	0.896103	1	0.966112	0.993971	0.952228	0.681014	0.927192	0.713684	0.941101	0.996472	0.953822	0.737259	1	0.632424	0.903441	0.966675	0.866169	0.344695
HNIP.Chr9	0.999458	0.886871	0.896103	0.955178	0.935185	0.993971	0.966483	0.643668	0.683084	0.965313	0.980436	0.996472	0.953822	0.943275	0.0330112	0.632424	0.903441	0.657718	0.925502	0.812636
HNIP.Chr10	0.722543	0.886871	0.896103	1	0.935185	0.993971	0.952228	0.831028	0.927192	0.965313	0.644824	0.996472	0.953822	0.943275	1	0.632424	0.731932	0.115937	0.925502	0.812636
HNIP.Chr11	0.907534	0.886871	0.969857	1	0.935185	0.820545	0.952228	0.970906	0.927192	0.965313	0.941101	0.996472	0.953822	0.943275	1	0.632424	0.731932	0.966675	0.866169	0.181297
LLON.1	1	1	1	2.70771e-286	1	1	1	1	1	1	1	1	1	1	1	1	1	1	1	1
LLON.2	8.36382e-177	4.47466e-118	1	1	1	1	1	1	1	1	1	1	1	1	1	1	1	1	1	1
LLON.3	1	1	6.18142e-292	1	1	1	1	1	1	1	1	1	1	1	1	1	1	1	1	1
LLON.4	1	1	1	1	1	1.51328e-244	1	1	1	1	1	1	1	1	1	1	1	1	1	1
LLON.5	1	1	1	1	1	1	9.34939e-235	1	1	1	1	1	1	1	1	1	1	1	1	1
LLON.6	1	1	1	1	1	1	1	1	1	2.40129e-204	1	1	1	1	1	1	1	1	1	1
LLON.7	1	1	1	1	1	1	1	1	6.72632e-197	1	1	1	1	1	1	1	1	1	1	1
LLON.8	1	1	1	1	1	1	1	1	1	1	1	1	1	1	1	3.5556e-114	1	1	1	1
LLON.9	1	1	1	1	1	1	1	5.64591e-225	1	1	1	1	1	1	1	1	1	1	1	1
LLON.10	1	1	1	1	1	1	1	1	1	1	1	3.68787e-189	1	1	1	1	1	1	1	1
LLON.11	1	1	1	1	4.49173e-268	1	1	1	1	1	1	1	1	1	1	1	1	1	1	1
LLON.12	1	1	1	1	1	1	1	1	1	1	1	1	1	1.77232e-151	1	1	1	1	1	1
LLON.13	1	1	1	1	1	1	1	1	1	1	1	1	1	1	1	1	1	5.84503e-92	1	1
LLON.14	1	1	1	1	1	1	1	1	1	1	1	1	1	1	1	1	1	1	1.97358e-70	1
LLON.16	1	1	1	1	1	1	1	1	1	1	1	1	1	1	1.14454e-143	1	1	1	1	1
LLON.17	1	1	1	1	1	1	1	1	1	1	3.38335e-185	1	1	1	1	1	1	1	1	1
LLON.15	1	1	1	1	1	1	1	1	1	1	1	1	1	1	1	1	1.69367e-95	1	1	1
LLON.18	1	1	1	1	1	1	1	1	1	1	1	1	1	1	1	1	1	1	1	3.58786e-54
LLON.19	1	1	1	1	1	1	1	1	1	1	1	1	1.50736e-156	1	1	1	1	1	1	1
MVUL.MV001	1	0.757842	0.216002	0.895293	1	1	1	1	1	1	1	1	1	1	1	1	0.544929	0.950107	1	1
MVUL.MV002	1	1	1	0.632051	1	0.965311	1	1	1	1	1	1	1	0.604473	1	1	1	1	0.889935	1
MVUL.MV003	1	1	1	0.164478	1	0.965465	1	1	1	1	1	1	1	1	1	1	0.544929	1	1	1
MVUL.MV004	1	1	1	1	1	0.218417	1	1	1	1	1	0.923468	1	1	1	1	1	1	0.889935	1
MVUL.MV005	1	1	1	1	1	1	1	1	1	1	1	0.923468	1	0.876556	1	0.522308	1	1	0.933878	1
MVUL.MV006	1	1	1	0.632051	1	1	1	1	1	0.811616	1	1	1	1	1	1	1	0.950107	1	0.65924
MVUL.MV007	1	1	1	1	1	0.965311	1	0.954291	1	1	0.424478	0.0746248	1	1	1	1	1	1	1	1
MVUL.MV008	1	0.929188	1	1	1	1	1	1	1	0.811616	0.424478	1	0.926693	1	1	1	1	1	1	1
MVUL.MV009	1	1	1	0.632051	1	1	1	1	1	1	1	1	1	1	1	1	1	1	0.889935	1
MVUL.MV010	1	1	1	1	1	1	1	1	1	0.811616	0.424478	1	1	0.285453	1	1	1	1	1	1
MVUL.MV011	1	1	1	1	1	0.965311	0.418811	1	0.1076	1	1	1	1	1	0.991463	1	1	0.950107	1	1
MVUL.MV012	1	1	1	1	1	1	0.173308	0.315799	1	1	1	1	1	1	1	0.328181	1	1	1	1
MVUL.MV013	1	1	1	0.744973	1	0.965311	1	1	1	1	1	1	1	1	1	1	1	1	0.889935	0.65924
MVUL.MV014	1	1	1	1	1	1	1	1	1	1	1	1	1	1	0.991463	1	1	1	0.889935	1
MVUL.MV015	1	1	1	1	1	0.965311	0.418811	1	0.392352	1	1	1	1	1	1	1	1	1	0.889935	1
MVUL.MV016	1	1	1	0.895293	1	0.965311	0.418811	1	1	1	1	1	0.926693	1	1	1	1	1	1	1
MVUL.MV017	1	1	1	1	1	1	0.617838	1	1	0.811616	1	1	1	0.285453	1	1	1	0.950107	0.889935	1
MVUL.MV018	1	1	1	1	1	0.965311	0.418811	1	1	1	1	1	1	1	1	1	1	1	1	1
MVUL.MV019	1	1	1	1	1	0.218417	1	1	1	1	1	0.05817	1	1	1	1	1	0.950107	1	1
MVUL.MV020	1	1	1	1	1	0.965311	1	1	1	0.198117	1	0.923468	1	0.605231	1	1	1	1	1	1
MVUL.MV021	1	1	1	1	1	1	0.879185	1	1	0.811616	1	1	1	0.285453	1	1	1	1	0.158575	1
MVUL.MV022	1	1	1	0.632051	1	1	1	1	1	1	1	1	1	0.995778	1	1	1	1	0.35159	1
MVUL.MV023	1	1	1	0.744973	1	1	1	0.954291	1	1	1	1	1	1	1	1	1	1	0.889935	1
MVUL.MV024	1	1	1	1	1	1	1	1	1	1	1	1	1	1	0.698594	1	0.407188	0.950107	0.933878	1
MVUL.MV025	1	1	1	1	1	0.965311	1	1	1	1	1	1	1	1	1	1	1	1	0.933878	1
MVUL.MV026	1	1	1	1	1	1	1	1	1	1	0.424478	0.923468	1	1	1	1	0.544929	1	0.889935	1
MVUL.MV027	1	1	1	0.519797	1	1	1	1	1	0.962326	1	1	1	1	0.991463	1	1	1	0.889935	1
MVUL.MV028	1	1	1	1	1	0.965311	1	1	1	1	1	0.169009	1	1	1	1	1	1	0.933878	1
MVUL.MV029	1	1	1	1	1	1	0.455518	1	1	1	1	1	1	0.285453	1	1	1	1	0.889935	1
MVUL.MV030	1	1	1	1	1	1	1	1	1	1	1	1	1	0.916176	0.991463	1	1	1	0.933878	0.65924
MVUL.MV031	1	1	1	1	1	0.965311	1	1	1	0.523882	1	0.923468	0.926693	0.605231	1	1	1	1	1	0.85005
MVUL.MV032	1	1	1	1	1	1	0.418811	1	1	0.523882	1	1	1	1	1	1	1	1	0.949778	0.85005
MVUL.MV033	1	1	1	1	1	1	1	1	0.392352	0.928159	1	1	1	0.61293	1	1	1	1	0.889935	1
MVUL.MV034	1	1	1	1	1	1	0.418811	1	1	0.523882	1	1	1	0.876556	1	1	1	1	0.889935	1
MVUL.MV035	1	1	0.508873	1	1	1	0.455518	1	1	0.523882	1	1	1	0.604473	1	1	1	1	0.889935	1
MVUL.MV036	1	1	1	0.744973	1	0.965311	1	1	1	1	1	0.142975	1	1	1	1	1	1	0.889935	0.85005
MVUL.MV037	1	1	1	1	1	1	1	1	1	0.962326	1	1	1	1	0.676346	0.328181	1	1	0.889935	1
MVUL.MV038	1	1	1	1	1	1	1	1	1	1	1	1	1	1	1	1	1	1	1	0.85005
MVUL.MV039	1	1	1	0.172798	1	1	1	1	1	1	1	1	1	0.803716	1	1	1	1	1	0.709122
MVUL.MV040	1	1	1	0.907399	1	0.965311	1	1	1	1	1	0.923468	1	1	0.991463	1	0.695031	1	1	1
MVUL.MV041	1	1	1	1	1	0.965311	1	1	1	1	1	1	1	1	1	1	1	1	1	0.599835
NNAJ.chr_1	0.120843	0.941229	0.952293	0.861792	0.99536	0.910221	0.999257	0.989861	1	1	0.767926	0.72276	0.872801	0.971283	0.998974	0.809582	0.877389	0.98979	0.719476	0.988872
NNAJ.chr_2	0.997565	0.941229	0.218297	0.861792	0.99536	0.987767	0.999257	0.989861	1	1	0.737672	0.95957	0.872801	0.971283	0.998974	0.994015	0.877389	0.113777	0.76112	0.997639
NNAJ.chr_3	0.997565	0.730631	0.00170999	0.861792	0.776926	0.987767	0.511263	0.997904	1	0.813694	0.982938	0.95957	0.872801	0.971283	0.998974	0.994015	0.877389	0.98979	0.994874	0.988872
NNAJ.chr_4	0.997565	0.941229	0.952293	0.861792	0.99536	0.784163	0.361413	0.997904	1	0.526578	0.767926	0.95957	0.986106	0.971283	0.686945	0.936707	0.965978	0.98979	0.994874	0.93868
NNAJ.chr_5	0.997565	0.941229	0.952293	0.861792	0.99536	0.497379	0.999257	0.614392	1	1	0.982938	0.95957	0.986106	0.971283	0.998974	0.809582	0.877389	0.98979	0.994874	0.423557
NNAJ.chr_6	0.346844	0.941229	0.952293	0.861792	0.776926	0.784163	0.999257	0.989861	1	1	0.982938	0.95957	0.872801	0.971283	0.121571	0.994015	0.877389	0.98979	0.719476	0.988872
NNAJ.chr_7	0.997565	0.941229	0.952293	0.861792	0.782428	0.987767	0.822157	0.718823	1	1	0.982938	0.72276	0.408383	0.971283	0.998974	0.809582	0.877389	0.98979	0.994874	0.997639
NNAJ.chr_8	0.997565	0.730631	0.952293	1	0.99536	0.987767	0.157015	0.989861	1	1	0.767926	0.95957	0.872801	0.971283	0.998974	0.775301	0.877389	0.98979	0.719476	0.988872
NNAJ.chr_9	0.798178	0.941229	0.952293	0.965665	0.99536	0.987767	0.999257	0.614392	1	0.526578	0.737672	0.95957	0.872801	0.971283	0.998974	0.936707	0.965978	0.98979	0.719476	0.997639
NNAJ.chr_10	0.997565	1	0.952293	0.981738	0.801153	0.987767	0.999257	0.0578511	0.565993	1	0.737672	0.95957	0.872801	0.971283	0.998974	0.994015	0.877389	0.98979	0.994874	0.423557
NNAJ.chr_11	0.997565	1	0.952293	0.981738	0.99536	0.966336	0.999257	0.989861	1	0.813694	0.767926	0.95957	0.872801	0.250419	0.998974	0.285276	0.877389	0.873295	0.994874	0.988872
NNAJ.chr_12	0.798178	0.941229	0.952293	0.861792	0.99536	0.987767	0.999257	0.939078	1	1	0.982938	0.95957	0.130294	0.250419	0.998974	0.936707	0.877389	0.873295	0.994874	0.988872
NNAJ.chr_13	0.798178	0.941229	0.952293	1	0.99536	0.987767	0.736749	0.997904	1	1	0.982938	0.95957	0.872801	0.0543823	0.998974	0.324794	0.965978	0.113777	0.994874	0.988872
NNAJ.chr_14	0.997565	1	0.952293	0.883813	0.99536	0.910221	0.361413	0.614392	1	0.813694	0.982938	0.95957	0.986106	0.971283	0.121571	0.994015	0.877389	0.98979	0.719476	0.696852
NNAJ.chr_15	0.997565	0.941229	0.952293	0.981738	0.776926	0.987767	0.361413	0.873798	1	1	0.982938	0.95957	0.986106	0.971283	0.121571	0.994015	0.877389	0.873295	0.719476	0.988872
NNAJ.chr_16	0.997565	0.941229	0.755729	1	0.99536	0.497379	0.999257	0.989861	1	0.813694	0.982938	0.901522	0.872801	0.971283	0.998974	0.994015	0.877389	0.98979	0.664739	0.423557
NNAJ.chr_17	0.346844	0.941229	0.952293	0.981738	0.99536	0.497379	0.999257	0.614392	1	1	0.982938	0.95957	0.986106	0.971283	0.998974	0.994015	0.877389	0.0664833	0.719476	0.988872
OFUS.CAIIXF020000001.1	4.59459e-53	6.50155e-120	2.12346e-59	1.59408e-39	1	1	1	1	1	1	1	1	1	1	1	1	1	1	1	1
OFUS.CAIIXF020000005.1	1	1	1	1	1.21976e-129	7.01288e-108	1	1	1	1	1	1	1	1	1	1	1	1	1	1
OFUS.CAIIXF020000006.1	1	1	1	1	1	1	1	1	1.1282e-123	3.27729e-67	1	1	1	1	1	1	1	1	1	1
OFUS.CAIIXF020000007.1	1	1	1	1	1	1	1	1	1	1	1.09011e-96	5.84999e-33	3.14654e-52	1	1	1	1	1	1	1
OFUS.CAIIXF020000008.1	1	1	1	1	1	1	2.44434e-273	1	1	1	1	1	1	1	1	1	1	1	1	1
OFUS.CAIIXF020000009.1	1	1	1	1	1	1	1	2.41751e-243	1	1	1	1	1	1	1	1	1	1	1	1
OFUS.CAIIXF020000010.1	1	1	1	1	1	1	1	1	1	1	1	1	1	1	1	1	5.81066e-170	3.05577e-27	1	1
OFUS.CAIIXF020000011.1	1	1	1	1	1	1	1	1	1	1	1	1	1	1	1	5.26511e-216	1	1	1	1
OFUS.CAIIXF020000012.1	1	1	1	1	1	1	1	1	1	1	1	1	1	2.00641e-229	1	1	1	1	1	1
OFUS.CAIIXF020000002.1	1	1	1	1	1	1	1	1	1	1	1	1	1	1	1	1	1	1	3.61539e-184	1
OFUS.CAIIXF020000003.1	1	1	1	1	1	1	1	1	1	1	1	1	1	1	2.34894e-233	1	1	1	1	1
OFUS.CAIIXF020000004.1	1	1	1	1	1	1	1	1	1	1	1	1	1	1	1	1	1	1	1	6.52296e-153
PECH.Superscaffold1	1	1	1	1	3.79349e-97	1.4877e-74	1	1	1	1	1	1	1	1	1	1	1	1	1	0.998484
PECH.Superscaffold2	1	1	1	1	1	1	3.79606e-26	5.45099e-164	1	1	1	1	1	1	1	1	1	1	1	0.998484
PECH.Superscaffold5	1	1	4.30081e-210	1	1	1	1	1	1	1	1	1	1	1	1	1	1	1	1	0.998484
PECH.Superscaffold3	1	1	1	1	1	1	1	1	1	1	1	1	1	1.154e-68	1.34653e-46	1	1	1	1	0.998484
PECH.Superscaffold4	1	1	1	1	1	1	1	1	1	1	1	1	1	1	1	1	1	3.02958e-155	1	0.998484
PECH.Superscaffold7	4.42145e-64	4.6899e-154	1	1	1	1	1	1	1	1	1	1	1	1	1	1	1	1	1	0.998484
PECH.Superscaffold6	1	1	1	1	1	1	1	1	1	1	1	1	1	1	1	4.39296e-47	2.07102e-60	1	1	0.998484
PECH.Superscaffold8	1	1	1	4.68836e-223	1	1	1	1	1	1	1	1	1	1	1	1	1	1	1	0.998484
PECH.Superscaffold10	1	1	1	1	1	1	1	1	2.90376e-136	3.2963e-21	1	1	1	1	1	1	1	1	1	0.998484
PECH.Superscaffold9	1	1	1	1	1	1	1	1	1	1	4.31925e-175	1	1	1	1	1	1	1	1	0.998484
PECH.Superscaffold11	1	1	1	1	1	1	1	1	1	1	1	1	1	1	1	1	1	1	1.08081e-140	0.998484
PECH.Superscaffold12	1	1	1	1	1	1	1	1	1	1	1	1.31228e-178	1	1	1	1	1	1	1	0.998484
PECH.Superscaffold14	1	1	1	1	1	1	1	1	1	1	1	1	1	1	1	1	1	1	1	9.16591e-63
PECH.Superscaffold13	1	1	1	1	1	1	1	1	1	1	1	1	1.09199e-154	1	1	1	1	1	1	0.998484
PMAX.NC_047015.1	1	6.94329e-273	1	1	1	1	1	1	1	1	1	1	1	1	1	1	1	1	1	1
PMAX.NC_047016.1	1	1	1	2.52937e-151	5.92314e-62	1	1	1	1	1	1	1	1	1	1	1	1	1	1	1
PMAX.NC_047017.1	6.54812598194592e-311	1	1	1	1	1	1	1	1	1	1	1	1	1	1	1	1	1	1	1
PMAX.NC_047018.1	1	1	1	1	1	1.75224e-254	1	1	1	1	1	1	1	1	1	1	1	1	1	1
PMAX.NC_047019.1	1	1	1	1	1	1	1	7.62267e-241	1	1	1	1	1	1	1	1	1	1	1	1
PMAX.NC_047020.1	1	1	1	1	1	1	1	1	6.64866e-210	1	1	1	1	1	1	1	1	1	1	1
PMAX.NC_047021.1	1	1	1	1	1	1	1	1	1	2.50858e-202	1	1	1	1	1	1	1	1	1	1
PMAX.NC_047022.1	1	1	2.71092e-256	1	1	1	1	1	1	1	1	1	1	1	1	1	1	1	1	1
PMAX.NC_047023.1	1	1	1	1	1	1	1	1	1	1	1.1556e-202	1	1	1	1	1	1	1	1	1
PMAX.NC_047024.1	1	1	1	1	1	1	1	1	1	1	1	1	1	1	1	1	1.90123e-105	1	1	1
PMAX.NC_047025.1	1	1	1	1	1	1	6.40444e-249	1	1	1	1	1	1	1	1	1	1	1	1	1
PMAX.NC_047026.1	1	1	1	1	1	1	1	1	1	1	1	8.19946e-195	1	1	1	1	1	1	1	1
PMAX.NC_047027.1	1	1	1	1	1	1	1	1	1	1	1	1	1	1	1	1	1	1	1	1.11635e-50
PMAX.NC_047028.1	1	1	1	1	1	1	1	1	1	1	1	1	9.00615e-185	1	1	1	1	1	1	1
PMAX.NC_047029.1	1	1	1	1	1	1	1	1	1	1	1	1	1	2.94406e-147	1	1	1	1	1	1
PMAX.NC_047030.1	1	1	1	1	1	1	1	1	1	1	1	1	1	1	4.95765e-158	1	1	1	1	1
PMAX.NC_047031.1	1	1	1	1	1	1	1	1	1	1	1	1	1	1	1	1	1	1	2.99465e-74	1
PMAX.NC_047032.1	1	1	1	1	1	1	1	1	1	1	1	1	1	1	1	4.54962e-134	1	1	1	1
PMAX.NC_047033.1	1	1	1	1	1	1	1	1	1	1	1	1	1	1	1	1	1	1.24608e-91	1	1
SBEN.Ch_6	2.75389e-11	1.97699e-33	4.84165e-54	1	1	0.999455	1	1	0.999999	1	1	1	1	0.999946	1	1	0.999506	1	0.999989	0.999926
SBEN.Ch_8	1	0.999985	1	1	1	0.999455	1	3.22828e-46	8.67612e-63	1	1	1	1	0.999946	1	1	0.999506	1	0.999989	0.999926
SBEN.Ch_2	1	0.999985	1	1	1	6.76742e-41	2.48238e-70	1	0.999999	1	1	1	1	0.999946	1	1	0.999506	1	0.999989	0.999926
SBEN.Ch_9	1	0.999985	1	1	1	0.999455	1	1	0.999999	1	1	2.5298e-21	4.48431e-61	0.999946	1	1	0.876357	1	0.999989	0.999926
SBEN.Ch_11	1	0.999985	1	1	1	0.999455	1	1	0.999999	1	1	1	1	2.14907e-72	1	1	0.999506	1	0.999989	0.999926
SBEN.Ch_5	1	0.999985	1	1	1	0.999455	1	1	0.999999	3.82858e-29	4.00804e-60	1	1	0.999946	1	1	0.999506	1	0.999989	0.999926
SBEN.Ch_4	1	0.999985	1	8.74477e-72	6.70414e-26	0.999455	1	1	0.999999	1	1	1	1	0.999946	1	1	0.999506	1	0.999989	0.999926
SBEN.Ch_3	1	0.999985	1	1	1	0.999455	1	1	0.999999	1	1	1	1	0.999946	1.51966e-91	2.46908e-10	0.999506	1	0.999989	0.999926
SBEN.Ch_7	1	0.999985	1	1	1	0.999455	1	1	0.999999	1	1	1	1	0.999946	1	1	2.05263e-50	9.10743e-17	0.999989	0.999926
SBEN.Ch_10	1	0.999985	1	1	1	0.999455	1	1	0.999999	1	1	1	1	0.999946	1	1	0.999506	1	9.56341e-79	0.999926
SBEN.Ch_1	1	0.999985	1	1	1	0.999455	1	1	0.999999	1	1	1	1	0.999946	1	1	0.999506	1	0.999989	2.83724e-47
SNUD.CM049306.1	2.74968e-111	6.41842e-127	1	1	1	1	1	1	1	1	1	1	1	1	1	1	1	1	1	1
SNUD.CM049307.1	1	1	1	2.74002e-237	1	1	1	1	1	1	1	1	1	1	1	1	1	1	1	1
SNUD.CM049308.1	1	1	1.44892e-278	1	1	1	1	1	1	1	1	1	1	1	1	1	1	1	1	1
SNUD.CM049309.1	1	1	1	1	1	1	2.16505e-185	7.15591e-36	1	1	1	1	1	1	1	1	1	1	1	1
SNUD.CM049310.1	1	1	1	1	1.04885e-85	9.5521e-129	1	1	1	1	1	1	1	1	1	1	1	1	1	1
SNUD.CM049311.1	1	1	1	1	1	1	1	1	1	1	1.06057e-204	1	1	1	1	1	1	1	1	1
SNUD.CM049312.1	1	1	1	1	1	1	1	1	2.02843e-237	1	1	1	1	1	1	1	1	1	1	1
SNUD.CM049313.1	1	1	1	1	1	1	1	1	1	1	1	4.73113e-179	1	1	1	1	1	1	1	1
SNUD.CM049314.1	1	1	1	1	1	1	1	1	1	1	1	1	1	6.88071e-161	1	1	1	1	1	1
SNUD.CM049315.1	1	1	1	1	1	1	1	1	1	1	1	1	4.32225e-183	1	1	1	1	1	1	1
SNUD.CM049316.1	1	1	1	1	1	1	1	1	1	4.11582e-227	1	1	1	1	1	1	1	1	1	1
SNUD.CM049317.1	1	1	1	1	1	1	1	1	1	1	1	1	1	1	1	1	1	1	2.0373e-84	1
SNUD.CM049318.1	1	1	1	1	1	1	1	1	1	1	1	1	1	1	2.50839e-130	1	1	1	1	1
SNUD.CM049319.1	1	1	1	1	1	1	1	1	1	1	1	1	1	1	1	1	1.81928e-96	1	1	1
SNUD.CM049320.1	1	1	1	1	1	1	1	1	1	1	1	1	1	1	1	5.1137e-123	1	1	1	1
SNUD.CM049321.1	1	1	1	1	1	1	1	1	1	1	1	1	1	1	1	1	1	4.94396e-86	1	1
SNUD.CM049322.1	1	1	1	1	1	1	1	1	1	1	1	1	1	1	1	1	1	1	1	6.01441e-42
WPIG.Chr1	0.614577	0.487658	0.950881	0.883413	0.998585	0.842056	0.944803	0.500929	0.855117	1	0.962156	0.89948	0.913953	0.969273	0.849237	1	0.893535	0.893848	0.815869	0.68445
WPIG.Chr2	0.950205	0.993377	0.653702	0.918044	0.728184	0.842056	0.944803	0.986805	0.855117	0.831028	0.705208	0.805755	0.913953	0.969273	0.742259	1	0.893535	0.893848	0.815869	0.563689
WPIG.Chr3	0.726103	0.691252	0.950881	0.883413	0.998585	0.986759	0.944803	0.0106925	0.814946	0.15712	0.705208	0.89948	0.913953	0.969273	0.995324	1	0.893535	0.893848	0.815869	0.998618
WPIG.Chr4	0.986163	0.00399752	0.14494	0.883413	0.728184	0.842056	0.944803	0.986805	0.814946	1	0.962156	0.805755	0.913953	0.969273	0.732027	1	0.893535	0.893848	0.828298	0.998618
WPIG.Chr5	0.81343	0.993377	0.950881	0.140887	0.728184	0.906747	0.944803	0.986805	0.855117	0.816204	0.705208	0.89948	0.913953	0.969273	0.995324	1	0.893535	0.893848	0.815869	0.68445
WPIG.Chr6	0.986163	0.993377	0.219709	0.883413	0.998585	0.842056	0.00736353	0.788744	0.969731	0.973453	0.962156	0.89948	0.913953	0.960949	0.742259	0.893883	0.893535	0.893848	0.815869	0.998618
WPIG.Chr7	0.986163	0.993377	0.950881	0.883413	0.924409	0.842056	0.944803	0.986805	0.969731	0.973163	0.705208	0.89948	0.913953	0.704778	0.732027	0.135053	0.539856	0.959686	0.815869	0.998618
WPIG.Chr8	0.614577	0.993377	0.950881	0.883413	0.680701	0.842056	0.944803	0.986805	0.855117	1	0.705208	0.805755	0.913953	0.807253	0.995324	1	0.893535	0.893848	0.815869	0.699102
WPIG.Chr9	0.986163	0.993377	0.950881	0.883413	0.859933	0.906747	0.944803	0.83532	0.855117	1	0.705208	0.89948	0.913953	0.969273	0.732027	1	0.539856	0.893848	0.815869	0.563689
WPIG.Chr10	0.643279	0.993377	0.950881	0.883413	0.859933	0.906747	0.944803	0.986805	0.814946	1	0.962156	0.89948	0.769842	0.205727	0.995324	1	0.539856	0.893848	0.989085	0.699102
WPIG.Chr11	0.726103	0.940955	0.950881	0.883413	0.807422	0.842056	0.944803	0.986805	0.855117	1	0.962156	0.89948	0.913953	0.969273	0.995324	1	0.539856	0.893848	0.815869	0.216364

## Sheet: CrassiLGs
	EAND_MVUL_NNAJ_8	EAND_MVUL_NNAJ_45	EAND_MVUL_NNAJ_78	EAND_MVUL_NNAJ_2	EAND_MVUL_NNAJ_12	EAND_MVUL_NNAJ_21	EAND_MVUL_NNAJ_50	EAND_MVUL_NNAJ_69	EAND_MVUL_NNAJ_9	EAND_MVUL_NNAJ_33	EAND_MVUL_NNAJ_96	EAND_MVUL_NNAJ_32	EAND_MVUL_NNAJ_13	EAND_MVUL_NNAJ_40	EAND_MVUL_NNAJ_11	EAND_MVUL_NNAJ_27	EAND_MVUL_NNAJ_1	EAND_MVUL_NNAJ_28	EAND_MVUL_NNAJ_61	EAND_MVUL_NNAJ_37	EAND_MVUL_NNAJ_18	EAND_MVUL_NNAJ_74	EAND_MVUL_NNAJ_42	EAND_MVUL_NNAJ_38	EAND_MVUL_NNAJ_54	EAND_MVUL_NNAJ_24	EAND_MVUL_NNAJ_7	EAND_MVUL_NNAJ_60	EAND_MVUL_NNAJ_57	EAND_MVUL_NNAJ_99	EAND_MVUL_NNAJ_86	EAND_MVUL_NNAJ_65	EAND_MVUL_NNAJ_41	EAND_MVUL_NNAJ_68	EAND_MVUL_NNAJ_55	EAND_MVUL_NNAJ_97	EAND_MVUL_NNAJ_89	EAND_MVUL_NNAJ_79	EAND_MVUL_NNAJ_63	EAND_MVUL_NNAJ_34	EAND_MVUL_NNAJ_95	EAND_MVUL_NNAJ_5	EAND_MVUL_NNAJ_81	EAND_MVUL_NNAJ_64	EAND_MVUL_NNAJ_67	EAND_MVUL_NNAJ_87	EAND_MVUL_NNAJ_46	EAND_MVUL_NNAJ_44	EAND_MVUL_NNAJ_4
CMAT.chr_1	0	5.7294e-177	1.44851e-91	0	1	1	1	1	1	1	1	1	1	1	1	1	1	1	1	1	1	1	1	1	1	1	1	1	1	1	1	1	1	1	1	1	1	1	1	1	1	1	1	1	1	1	1	1	1
CMAT.chr_2	1	1	1	1	1.35287408378921e-315	0	3.27454e-197	8.81883e-129	1	1	1	1	1	1	1	1	1	1	1	1	1	1	1	1	1	1	1	1	1	1	1	1	1	1	1	1	1	1	1	1	1	1	1	1	1	1	1	1	1
CMAT.chr_3	1	1	1	1	1	1	1	1	0	3.63143e-235	7.35664e-46	3.70113e-253	1	1	1	1	1	1	1	1	1	1	1	1	1	1	1	1	1	1	1	1	1	1	1	1	1	1	1	1	1	1	1	1	1	1	1	1	1
CMAT.chr_4	1	1	1	1	1	1	1	1	1	1	1	1	1	1	1	5.89406e-269	0	1	1	1	1	1	1	1	1	1	1	1	1	1	1	1	1	1	1	1	1	1	1	1	1	1	1	1	1	1	1	1	1
CMAT.chr_5	1	1	1	1	1	1	1	1	1	1	1	1	0	1.01669e-172	0	1	1	1	1	1	1	1	1	1	1	1	1	1	1	1	1	1	1	1	1	1	1	1	1	1	1	1	1	1	1	1	1	1	1
CMAT.chr_6	1	1	1	1	1	1	1	1	1	1	1	1	1	1	1	1	1	1	1	1	1	1	1	1.11867e-38	1.47087e-211	0.00446916	0	1	1	1	1	1	1	1	1	1	1	1	1	1	1	1	1	1	1	1	1	1	1
CMAT.chr_7	1	1	1	1	1	1	1	1	1	1	1	1	1	1	1	1	1	1	1	1	1	1	1	1	1	1	1	1	1	1	1	1	1	1	1	1	1	1	1	1	1	1	1.47164e-132	3.03401e-172	1.24707e-153	1.2727e-107	1	1	1
CMAT.chr_8	1	1	1	1	1	1	1	1	1	1	1	1	1	1	1	1	1	1	1	1	1	1	1	1	1	1	1	7.48863e-196	1.22632e-193	4.06797e-31	7.50958e-89	3.44833e-161	1	1	1	1	1	1	1	1	1	1	1	1	1	1	1	1	1
CMAT.chr_9	1	1	1	1	1	1	1	1	1	1	1	1	1	1	1	1	1	1	1	1	0	2.20005e-110	1.13433e-240	1	1	1	1	1	1	1	1	1	1	1	1	1	1	1	1	1	1	1	1	1	1	1	1	1	1
CMAT.chr_10	1	1	1	1	1	1	1	1	1	1	1	1	1	1	1	1	1	0	4.30578e-173	9.41191e-241	1	1	1	1	1	1	1	1	1	1	1	1	1	1	1	1	1	1	1	1	1	1	1	1	1	1	1	1	1
CMAT.chr_11	1	1	1	1	1	1	1	1	1	1	1	1	1	1	1	1	1	1	1	1	1	1	1	1	1	1	1	1	1	1	1	1	1	1	1	1	9.58329e-81	6.6409e-115	6.84823e-147	1.32337e-298	1	1	1	1	1	1	1	1	1
CMAT.chr_12	1	1	1	1	1	1	1	1	1	1	1	1	1	1	1	1	1	1	1	1	1	1	1	1	1	1	1	1	1	1	1	1	1.68102e-250	2.12847e-156	5.27932e-188	2.47126e-45	1	1	1	1	1	1	1	1	1	1	1	1	1
CMAT.chr_13	1	1	1	1	1	1	1	1	1	1	1	1	1	1	1	1	1	1	1	1	1	1	1	3.07671e-141	1	0	1	1	1	1	1	1	1	1	1	1	1	1	1	1	1	1	1	1	1	1	1	1	1
CMAT.chr_14	1	1	1	1	1	1	1	1	1	1	1	1	1	1	1	1	1	1	1	1	1	1	1	1	1	1	1	1	1	1	1	1	1	1	1	1	1	1	1	1	6.1797e-70	0	1	1	1	1	1	1	1
CMAT.chr_15	1	1	1	1	1	1	1	1	1	1	1	1	1	1	1	1	1	1	1	1	1	1	1	1	1	1	1	1	1	1	1	1	1	1	1	1	1	1	1	1	1	1	1	1	1	1	1	1	0
CMAT.chr_16	1	1	1	1	1	1	1	1	1	1	1	1	1	1	1	1	1	1	1	1	1	1	1	1	1	1	1	1	1	1	1	1	1	1	1	1	1	1	1	1	1	1	1	1	1	1	8.54249e-276	4.06167e-306	1
CMAT.chr_17	1	1	1	1	1	1	1	1	1	1	1	1	1	1	1	1	1	1	1	1	1	1	1	1	1	1	1	1	1	1	1	1	1	1	1	1	1	1	1	1	1	1	1	1	1	1	1	1	1
EAND.GWHACBE00000001	0	1.09449e-161	2.76327e-208	5.43716e-280	4.97037e-40	1.44911826922535e-315	1	1	1	1	1	1	1	1	1	1	1	1	1	1	1	1	1	1	1	1	1	1	1	1	1	1	1	1	1	1	1	1	1	1	1	1	1	1	1	1	1	1	1
EAND.GWHACBE00000002	1	1	1	1	1	1	2.85665e-54	3.19017e-196	4.97473e-118	4.67918e-149	7.16516e-110	5.07363e-199	0	1.04222e-176	1	1	1	1	1	1	1	1	1	1	1	1	1	1	1	1	1	1	1	1	1	1	1	1	1	1	1	1	1	1	1	1	1	1	1
EAND.GWHACBE00000003	1	1	1	1	1	1	1	1	1	1	1	1	1	1	3.71282e-93	3.53786e-267	2.4846e-91	3.74756e-240	7.48303e-48	2.14528e-234	0	1	1	1	1	1	1	1	1	1	1	1	1	1	1	1	1	1	1	1	1	1	1	1	1	1	1	1	1
EAND.GWHACBE00000004	1	1	1	1	1	1	1	1	1	1	1	1	1	1	1	1	1	1	1	1	1	0	0	3.25302e-171	0	1	1	1	1	1	1	1	1	1	1	1	1	1	1	1	1	1	1	1	1	1	1	1	1
EAND.GWHACBE00000005	1	1	1	1	1	1	1	1	1	1	1	1	1	1	1	1	1	1	1	1	1	1	1	1	1	1	1	1	1	1	1	1	1	1	1	1	1	1	1	1	1	1	1	1	1	1	1	2.41579e-155	2.04604e-197
EAND.GWHACBE00000006	1	1	1	1	1	1	1	1	1	1	1	1	1	1	1	1	1	1	1	1	1	1	1	1	1	1	1	1	1	5.70433e-282	2.66755e-106	1.03286e-129	1.33446e-88	0	1	1	1	1	1	1	1	1	1	1	1	1	1	1	1
EAND.GWHACBE00000007	1	1	1	1	1	1	1	1	1	1	1	1	1	1	1	1	1	1	1	1	1	1	1	1	1	0	0	5.28161e-221	1.22254e-146	1	1	1	1	1	1	1	1	1	1	1	1	1	1	1	1	1	1	1	1
EAND.GWHACBE00000008	1	1	1	1	1	1	1	1	1	1	1	1	1	1	1	1	1	1	1	1	1	1	1	1	1	1	1	1	1	1	1	1	1	1	0	6.28982e-256	6.28982e-256	1	1	1	1	1	1	1	1	1	1	1	1
EAND.GWHACBE00000009	1	1	1	1	1	1	1	1	1	1	1	1	1	1	1	1	1	1	1	1	1	1	1	1	1	1	1	1	1	1	1	1	1	1	1	1	1	0	0	1	1	1	1	1	1	1	1	1	1
EAND.GWHACBE00000010	1	1	1	1	1	1	1	1	1	1	1	1	1	1	1	1	1	1	1	1	1	1	1	1	1	1	1	1	1	1	1	1	1	1	1	1	1	1	1	1	1	1	2.85495e-191	1.25314e-113	9.12174e-33	5.42038e-238	9.04823e-220	1	1
EAND.GWHACBE00000011	1	1	1	1	1	1	1	1	1	1	1	1	1	1	1	1	1	1	1	1	1	1	1	1	1	1	1	1	1	1	1	1	1	1	1	1	1	1	1	0	8.93775e-195	6.1524e-279	1	1	1	1	1	1	1
ECRY.scf7180000024016.6106231	0.461479	1	1	1	1	0.266651	1	1	1	1	1	1	1	1	1	1	1	1	1	1	1	1	1	1	1	1	1	1	5.48061e-05	1	1	1	1	1	0.035694	1	1	1	1	1	1	1	1	0.30488	1	1	1	1	1
ECRY.scf7180000024043.1468058	1.02663e-06	1	1	1	1	1	1	1	1	0.0239604	1	1	1	1	0.976547	1	1	1	1	1	1	1	1	1	1	1	1	1	4.19971e-05	1	1	1	1	1	1	1	1	1	1	1	1	0.148603	1	1	1	1	1	1	1
ECRY.scf7180000023970.4582792	1	1	2.22235e-05	2.80332e-10	1	1	0.635469	1	1	1	1	1	1	1	1	1	1	1	1	1	1	1	1	1	1	1	1	1	1	1	1	1	1	1	1	1	1	1	1	1	1	1	1	1	1	1	1	1	1
ECRY.scf7180000024048.3904504	1	1	1	1	0.926769	0.000143109	0.635469	7.0438e-06	1	1	0.0490144	1	1	0.331957	1	1	1	1	1	1	1	1	1	1	1	1	1	1	1	1	1	1	1	1	1	1	1	1	1	1	1	1	1	1	1	1	1	1	0.0506445
ECRY.scf7180000023901.4321316	1	1	1	1	1	1	1	1	0.0135805	5.00029e-16	1	0.263288	1	1	1	1	1	1	1	1	1	1	1	1	1	1	1	1	1	1	1	1	1	1	1	1	1	1	1	1	1	1	0.000298676	1	1	1	1	1	1
ECRY.scf7180000024041.5477867	1	1	1	1	2.46661e-13	1	1	0.000602704	1	1	0.000122799	1	0.883294	1	1	1	1	1	1	1	1	1	1	1	1	1	1	1	1	1	0.649673	1	1	1	1	1	1	1	1	0.0163874	1	1	1	1	1	1	1	1	1
ECRY.scf7180000023961.622029	1	1	1.53745e-09	1.97317e-05	1	1	1	1	1	1	1	1	1	1	1	1	1	1	1	1	1	0.781959	1	1	1	1	1	0.00858118	1	1	1	1	1	1	1	1	1	1	1	1	1	1	1	1	1	1	1	1	1
ECRY.scf7180000023746.4027801	0.271487	0.00255449	0.000890513	1	0.926769	1	1	1	1	1	1	1	1	1	1	1	1	1	1	1	1	1	1	1	1	1	1	1	0.537259	1	1	1	1	1	1	1	1	1	1	0.276144	1	1	1	1	1	1	1	1	1
ECRY.scf7180000023433.77741	1	1	1	1	1	1	1	1	1	1	1	1	1.72107e-08	1.56746e-06	1	1	1	1	1	1	1	1	1	1	1	1	1	1	1	1	1	1	1	1	1	1	1	1	1	1	1	0.388747	1	1	1	1	1	1	1
ECRY.scf7180000023648.3685046	1	1	1	1	1	1	1	1	0.00171984	0.0693511	1	0.457223	1	1	1	1	1	1	1	1	1	0.0789981	1	1	1	1	1	1	1	1	1	0.0577293	1	1	1	1	1	1	1	1	1	1	1	1	1	1	1	0.198309	1
ECRY.scf7180000023637.2435755	0.473163	1	1	1	1	9.75333e-07	7.56762e-11	1	1	1	1	1	1	1	1	1	1	1	1	1	1	1	1	1	1	1	1	1	1	1	1	1	1	1	1	1	1	1	1	1	1	1	1	1	1	1	1	1	1
ECRY.scf7180000024040.1232157	1	1	1	1	0.926769	1	1	1	1	1	0.941993	1	1	1	1	1	1	1	1	1	1	8.00059e-07	1	1	1	1	0.086625	1	0.983105	1	1	0.320797	1	1	1	1	1	1	1	1	1	1	1	1	1	1	1	1	1
ECRY.scf7180000023952.3473064	1	1	0.565428	0.646204	1	1	1	1	1	1	1	1	0.00289445	8.47893e-05	0.210547	1	1	1	1	1	1	1	1	1	1	1	1	1	1	1	1	1	1	1	1	1	1	1	1	1	1	1	1	1	1	1	1	1	1
ECRY.scf7180000023630.3359036	1	1	1	1	1	1	1	1	1	1	1	5.8223e-07	1	1	1	1	1	1	1	1	1	1	1	1	1	1	0.373258	1	1	1	1	1	1	1	1	1	1	0.0130715	0.000195368	1	1	1	1	1	1	1	1	0.707141	1
ECRY.scf7180000023750.3372389	1	1	1	1	1	1	1	1	1	1	1	1	1	1	1	1	1	1	1	1	1	1	1	1	1	1	1	1	1	0.175582	1	1	1	1	1	0.223617	0.161507	1	8.42975e-05	1	1	1	1	1	1	1	1	1	1
ECRY.scf7180000023670.2275729	0.271487	1	1	1	1	1	1	1	1	1	1	1	1	1	0.000493597	6.64661e-05	1	0.0206091	1	1	1	1	1	1	1	1	1	1	1	1	1	1	1	1	1	1	1	1	1	1	1	1	1	1	1	1	1	1	0.0269966
ECRY.scf7180000023724.3213358	1	1	0.00138343	0.0506035	0.101978	1	1	1	1	1	1	1	1	1	1	1	1	1	1	1	1	1	1	1	1	1	1	1	1	0.175582	1	1	1	1	1	1	1	1	1	1	1	1	1	1	1	1	0.00368718	1	1
ECRY.scf7180000024022.3207392	0.271487	1	1	1	1	1	1	1	1	1	1	1	1	1	1	1	1	1	0.000962083	3.64451e-06	1	1	1	1	1	1	1	1	0.983105	0.467231	1	1	1	1	1	1	1	1	1	1	1	0.0669454	1	1	1	1	1	1	1
ECRY.scf7180000023771.2162011	1	1	1	1	1	1	1	1	1	1	0.669479	1	1	1	1	0.00689633	1	1	1	1	1	0.46246	1	1	1	1	1	1	1	1	1	0.224317	1	1	1	1	1	1	1	1	0.349337	1	1	1	1	1	1	1	1
ECRY.scf7180000023809.1888596	0.0101108	9.70803e-09	0.00165358	1.26085e-06	1	1	1	1	1	1	1	1	1	1	1	1	1	1	1	1	1	1	1	1	1	1	1	1	1	1	1	1	1	1	1	1	1	1	1	1	1	1	1	1	1	1	1	1	1
ECRY.scf7180000023730.3122031	1	1	1	1	1	1	1	1	1	0.738949	0.63355	1	1	1	0.0017173	0.0251432	1	1	1	1	1	1	1	1	1	1	1	1	1	1	1	1	1	1	1	1	1	1	1	1	1	1	1	1	1	0.97263	1	1	0.0292533
ECRY.scf7180000023751.1365616	1	1	1	1	1	1	1	1	1	1	1	1	1	1	1	1	1	1	1	1	1	1	1	1	1	1	0.554708	1	0.131363	1	1	1	1	1	1	1	0.080288	0.0130715	0.00932349	1	1	1	1	1	1	1	1	1	1
ECRY.scf7180000023949.2978466	0.271487	1	1	1	1	0.581023	0.00135397	1	1	1	1	0.192583	1	1	1	1	1	1	1	1	1	1	1	1	1	1	1	1	1	1	1	1	1	1	1	1	0.509972	1	1	1	1	1	1	1	1	1	1	1	1
ECRY.scf7180000023782.2982715	1	1	1	1	1	1	1	1	1	1	1	1	1	1	1	1	1	1	1	1	1	1	3.45232e-12	1	1	1	1	1	1	1	1	1	1	1	1	0.000102333	1	1	1	1	1	1	1	1	1	1	1	1	1
ECRY.scf7180000023690.3279956	1	1	1	0.890465	1	0.226698	1	1	1	1	0.213855	1	1	1	1	1	1	1	1	1	1	1	1	1	1	1	0.554708	1	1	1	1	1	1	1	1	1	1	1	1	1	1	1	1	1	1	1	1	1	1
ECRY.scf7180000023727.1057424	1	1	1	1	1	1	1	1	1	1	1	1	1	6.3982e-14	1	1	1	1	1	1	1	1	1	1	1	1	1	1	1	1	0.09515	1	1	1	1	1	1	1	1	1	1	1	1	1	1	1	1	1	1
ECRY.scf7180000023262.31072	1	0.0122549	1.67342e-06	0.00647557	1	1	1	1	0.165513	1	0.0077978	1	1	1	1	1	1	1	1	1	1	1	1	1	1	1	1	0.816901	1	1	1	1	1	1	1	1	1	1	1	1	1	1	1	1	1	1	1	1	1
ECRY.scf7180000023623.336459	0.289387	1	1	1	1	1	1	1	1	1	1	1	1	1	1	0.0189754	1	1	1	1	1	1	1	1	1	1	1	1	1.64409e-09	1	1	1	1	1	1	1	1	1	1	1	1	1	1	1	1	1	1	1	1
ECRY.scf7180000023742.962986	1	1	1	1	1	1	1	1	1	1	4.03512e-07	1	0.0521591	1	1	1	1	0.205396	1	1	1	0.284637	1	1	1	1	0.086625	1	1	1	1	0.215814	1	1	1	1	1	1	1	1	1	1	1	1	1	1	1	1	1
ECRY.scf7180000023623.5591261	0.429217	1	1	1	1	1	1	1	1	1	1	1	1	1	1	1	1	0.46732	1	1	1	1	1	1	1	1	1	1	1.455e-08	1	1	1	1	1	1	1	1	1	1	1	1	1	1	1	1	1	1	1	0.215922
ECRY.scf7180000023624.2659075	1	0.071722	1	1	1	1	1	1	0.967026	1	0.63355	1	1	1	1	1	1	1	1	1	1	1	1	1	1	1	1	1	1	1	0.09515	1	1	1	1	1	1	1	1	1	1	1	1	1	1	1	1	1	1
ECRY.scf7180000023622.564893	1	1	1	1	1	1	1	1	0.000896245	1.2556e-05	1	0.341276	1	1	1	1	1	1	1	1	1	1	1	1	1	0.255181	1	1	1	1	1	1	1	1	1	1	1	1	1	1	0.457578	1	1	1	1	0.00047975	1	1	1
ECRY.scf7180000023654.243390	1	1	1	1	1	1	1	1	0.425901	1	1	1	1	1	1	1	1	1	1	1	1	1	1	1	1	0.000406021	0.086625	1	1	1	1	1	1	1	1	1	0.43997	1	0.000935946	1	1	1	1	1	1	1	1	1	1
ECRY.scf7180000023738.2603014	1	1	1	1	1	0.0261291	0.71608	1	0.504027	1	1	0.341276	1	1	0.0116611	1	1	1	1	1	1	1	1	1	1	1	1	1	1	1	1	1	1	1	1	1	1	1	1	1	1	1	1	1	0.363148	1	1	1	0.318559
ECRY.scf7180000023647.1063006	1	1	1	1	1	1	1	1	1	1.69067e-12	1	1	1	1	1	1	1	1	1	1	1	1	1	1	1	1	1	1	1	1	1	1	1	1	1	1	1	1	1	1	1	1	0.0129256	1	1	0.00973128	1	1	1
ECRY.scf7180000023987.2172811	1	1	1	1	1	1	1	1	1	1	0.63355	1	1	1	1	1	0.441394	0.0449059	1	1	1	0.781959	1	1	1	1	0.211386	1	0.569382	1	1	0.663635	1	1	1	1	1	1	1	1	1	1	1	1	1	1	1	1	1
ECRY.scf7180000023764.2523689	1	1	1	1	1	1	1	1	1	1	1	0.269451	1	1	1	1	1	1	1	1	1	1	1	1	1	1	0.108457	1	1	1	1	1	1	1	1	1	0.43997	0.0144614	8.42975e-05	1	1	1	1	1	1	1	1	1	1
ECRY.scf7180000023661.2563741	1	1	1	1	1	1	1	2.84381e-13	1	1	0.000122799	1	1	1	1	1	1	1	1	1	1	1	1	1	1	1	1	1	1	1	1	1	1	1	1	1	1	1	1	1	1	1	1	1	1	1	1	1	1
ECRY.scf7180000024005.2551396	1	1	1	1	1	1	1	1	1	1	1	1	1	1	0.00133564	5.86342e-05	1	0.0282587	1	1	1	1	1	1	1	1	1	1	1	1	1	0.443246	1	1	1	1	1	1	1	1	1	1	1	1	1	1	1	1	0.0292533
ECRY.scf7180000023965.3892078	1	1	1	1	1	0.0977162	0.000209332	1	1	1	1	1	1	1	1	1	1	1	1	1	1	1	1	1	1	1	1	1	1	1	1	1	1	1	1	1	1	1	1	1	0.0590628	1	1	1	1	1	1	1	1
ECRY.scf7180000023704.2061584	1	1	1	1	1	1	1	0.0633696	1	1	0.213855	1	1	1	1	1	1	1	1	1	1	1	1	1	1	1	1	1	1	1	0.09515	1	1	1	1	1	1	1	1	1	1	1	1	1	1	1	1	1	1
ECRY.scf7180000023747.1915408	1	1	1	1	1	1	1	1	1	1	0.0422809	1	0.777851	1	1	1	1	1	1	1	1	1	1	1	1	1	1	1	1	1	1	1	1	1	1	1	1	1	1	1	1	1	1	1	1	1	1	1	0.527369
ECRY.scf7180000023768.2185744	1	1	1	1	0.0600585	1	1	1	1	1	1	0.685615	1	1	1	1	1	1	1	1	1	1	1	1	1	1	1	1	1	1	1	1	1	1	1	0.223617	1	1	1	0.000182656	1	1	1	1	1	1	1	1	1
ECRY.scf7180000023650.2413482	1	1	1	1	1	1	1	1	1	1	1	1	5.97031e-07	0.00544457	1	1	1	1	1	1	1	1	1	1	1	1	1	1	1	1	1	1	1	1	1	1	1	1	1	1	1	1	1	1	1	1	1	1	1
ECRY.scf7180000023669.2531915	1	1	1	1	1	1	1	1	1	1	1	1	1	1	1	1	1	1	1	1	1	1	1	1	1	1.49419e-08	5.35674e-14	1	1	1	1	1	1	1	1	1	0.43997	1	1	1	1	1	1	1	1	1	1	1	1
ECRY.scf7180000023745.1975086	1	1	1	1	1	0.294134	0.00135397	1	1	1	1	1	0.61707	1	1	1	1	1	1	1	1	1	1	1	1	1	0.086625	1	1	1	1	1	1	1	1	1	1	1	1	1	1	1	1	1	1	1	1	1	1
ECRY.scf7180000023792.1757689	1	1	1	1	1	1	1	1	1	1	1	1	1	1	1	1	1	1	1	1	1	0.840984	1	1	1	1	0.657157	1	1	1	1	1	1	1	1	1	1	0.0144614	1	1	1	1	1	1	1	1	1	1	1
ECRY.scf7180000024023.2323017	1	1	1	0.000796588	1	0.595669	1	1	1	1	1	1	0.803765	1	1	1	0.0026374	1	1	1	1	1	1	1	1	1	1	1	1	1	1	1	1	1	1	1	1	1	1	1	1	1	1	1	1	1	1	1	1
ECRY.scf7180000023977.581247	1	1	0.202696	0.890465	1	1	1	1	1	1	0.606795	1	0.777851	1	1	1	1	1	1	1	1	0.781959	1	0.00354317	1	1	1	1	1	1	1	0.215814	1	1	1	1	1	1	1	1	1	1	1	1	1	1	1	1	1
ECRY.scf7180000023657.2288772	1	0.000419444	1	1	1	1	1	1	1	1	0.386193	1	1	1	1	1	1	1	0.0051099	0.0181564	1	1	1	1	1	1	1	1	1	1	1	1	1	1	1	1	1	1	1	1	1	1	1	1	1	1	1	1	1
ECRY.scf7180000023626.2277328	1	0.00905227	1	1	0.926769	1	1	1	1	1	1	1	1	1	1	1	1	1	0.00862289	3.64451e-06	0.0820931	1	1	1	1	1	1	1	1	1	1	1	1	1	1	1	1	1	1	1	1	1	1	1	1	1	1	1	1
ECRY.scf7180000023432.307514	1	1	1	1	1	1	1	1	1	1	1	1	1	1	1	3.45539e-10	3.20902e-07	4.60317e-05	1	0.520176	1	1	1	1	1	1	1	1	1	1	1	1	1	1	1	1	1	1	1	1	1	1	1	1	1	1	1	1	1
ECRY.scf7180000024042.1575494	1	1	1	1	1	0.503618	1	1	1	1	1	1	1	1	0.000493597	7.37249e-11	1	1	1	1	1	1	1	1	1	1	1	1	1	1	1	1	1	1	1	1	1	1	1	1	1	1	1	1	1	1	1	1	1
ECRY.scf7180000023641.2187235	1	1	1	1	1	1	1	1	1	1	0.00193215	1	1	1	1	1	1	1	1	1	1	1	1	1	1	1	1	1	1	1	1	8.73504e-10	1	1	1	1	1	1	1	1	1	1	1	1	1	1	1	1	1
ECRY.scf7180000023697.2107495	1	1	1	1	0.926769	1	1	1	1	1	1	1	1	1	1	1	1	1	1	1	1	1	1	1	1	1	0.211386	1	1	0.000353984	1	1	1	1	1	0.00584722	1	0.0130715	1	1	1	1	1	1	1	1	1	1	1
ECRY.scf7180000023649.769389	1	1	1	1	1	0.100713	1	1	1	1	1	1	1	1	1	1	1	1	1	1	1	1	2.12965e-09	1	1.50639e-06	1	1	1	1	1	1	1	1	1	1	1	1	1	1	1	1	1	1	1	1	1	1	1	1
ECRY.scf7180000023725.3537867	1	1	1	1	0.439981	1	1	1	1	1	1	1	1	1	1	1	1	1	1	1	1	1	1	1	1	1	1	1	1	1	1.7095e-09	1	1	1	1	1	1	1	1	1	1	1	1	0.313829	1	1	1	1	1
ECRY.scf7180000023265.169033	1	1	1	1	1	1	1	1	1	1	1	1	1	0.00384502	1	1	1	1	1	1	1	1	1	1	1	1	1	1	1	1	1	1	0.00214464	1	1	1	1	1	1	1	1	1	1	1	1	1	1	1	1
HMAN.Chr2	2.54908e-35	0.999952	1	1	1	0.999996	0.999998	1	0.999999	1	0.999987	1.01282e-06	1	1	8.55568e-31	1	1	4.17378e-29	1	0.99998	0.999996	1.10378e-14	1	1	1	1	1	0.999999	0.00227615	2.49949e-08	1.56656e-21	1	1	1	1	1	0.999999	1	0.999975	1	1	0.99999	0.105342	1	0.999991	4.19601e-08	1	1	1
HMAN.Chr1	1	0.999952	1	1	1	0.999996	0.999998	1.34068e-48	7.15582e-75	2.51823e-15	0.999987	1	1	1	0.999999	1	1	0.999998	1	0.99998	0.999996	1	1	1	1	1	1	0.999999	1	1	1	1	1	0.00132761	3.64196e-42	1	0.999999	1	0.999975	1	1	0.99999	1	2.12913e-07	0.999991	0.999999	1	2.18324e-43	1
HMAN.Chr3	9.40254e-05	0.999952	1	1	1	0.999996	0.999998	1	0.999999	5.23085e-05	2.57056e-12	1.81289e-11	1	4.0718e-05	0.999999	1	4.2685e-06	3.0767e-06	1	0.99998	0.579511	1.38021e-07	1	2.26338e-07	1.41286e-72	1	1	0.999999	1	1	1	1	1.35319e-10	1	1	1	0.999999	1	0.999975	1	1	0.99999	0.72509	1	0.999991	0.543023	1	1	1
HMAN.Chr4	1	0.999952	5.55119e-24	1	7.23626e-31	0.999996	3.80816e-19	1	0.999999	1	0.999987	1	2.44201e-18	1	0.0483176	1	1	0.999998	1	0.99998	0.999996	1	1	1	1	0.00285737	1	0.999999	0.000933936	1	1	1	1	1	1	8.36533e-21	0.999999	1	1.91956e-16	0.000388711	1	3.36379e-13	8.53508e-51	1	0.999991	0.999999	1	1	1
HMAN.Chr5	1	0.256091	1	1	1	0.999996	0.999998	0.245002	0.999999	5.23085e-05	1.73457e-15	1	1	1	0.999999	6.27975e-25	1	0.999998	1	0.99998	0.999996	1	1	1	1	1	1	0.999999	1	3.2385e-23	1	0.195819	1.58382e-25	1	1	1	0.999999	1	0.999975	1	1.41745e-97	0.99999	1	1	0.999991	0.999999	1	1	1
HMAN.Chr6	1	0.999952	1	1	1	6.39435e-29	0.999998	1	0.999999	1	0.999987	1	1.99045e-08	0.43463	0.000576664	0.0024294	1	6.6355e-05	1	0.99998	0.999996	1	1	1	1	3.15331e-06	1	0.999999	1	1	1	1	1	1	1	1	1.22237e-72	1.85563e-37	0.999975	1	1	0.99999	1	1	0.999991	1.13582e-08	1	1	1
HMAN.Chr7	0.828904	0.999952	1	1	1	0.999996	0.999998	1	0.999999	1	0.999987	1	1	7.83437e-15	0.999999	1	0.00166389	0.999998	1	0.99998	0.999996	1	1	2.01856e-08	1	1	1	5.61811e-78	1	1	1	1	1	1.97617e-09	1	0.00902906	0.999999	1	0.0717835	0.00452	1	0.0514348	1	1	0.999991	0.999999	8.92122e-30	1	1
HMAN.Chr8	1	0.999952	1	4.32473e-07	1	0.999996	0.999998	1	0.999999	1	0.999987	1	1	1	0.999999	1	1	0.999998	1	6.7145e-36	2.43601e-09	5.68149e-18	1.01432e-30	1	1	9.18334e-14	3.54907e-69	0.999999	1	1	1	1	1	1	1	1	0.999999	1	0.999975	1	1	0.99999	1	1	2.43476e-21	0.999999	1	1	1
HMAN.Chr9	1	0.999952	1	1.85565e-16	1	0.999996	0.999998	1	0.999999	1	0.999987	1	1	1	0.999999	1	1	0.999998	1	9.98629e-16	0.999996	1	1	1	1	1.10485e-14	1	0.999999	1	1	1	2.049e-53	1	1	1	1	0.999999	1	0.999975	1	0.00488334	0.99999	1	1	3.88793e-26	0.999999	1	1	3.40666e-39
HMAN.Chr10	1	0.999952	1	1	1	0.999996	0.999998	1	0.999999	0.00491725	0.999987	1	1	1	0.999999	0.893278	1	0.999998	8.60306e-106	0.99998	0.579511	2.00963e-06	1	1	1	1	1	0.999999	1	1	2.31316e-18	1	1	1	0.000168065	1	0.999999	1	0.999975	1	1	0.99999	1	1	0.999991	0.999999	6.45625e-17	1	1
HMAN.Chr11	3.4181e-05	1.27776e-51	1	1	1	7.05458e-16	0.999998	1	0.999999	1	0.999987	1	1	1	0.00790473	1.6929e-06	1	0.999998	1	0.99998	0.999996	1	1	1	1	1	1	0.999999	1	1.66298e-24	1	1	1	0.000388639	1	3.03178e-13	0.209074	1	0.999975	1	1	0.99999	1	1	0.999991	5.62389e-10	1	1	1
HMAN.Chr12	1	0.999952	1	1	1	0.999996	0.999998	1	0.999999	1	0.999987	1	1	3.75737e-33	0.999999	1	1	0.999998	1	0.99998	0.999996	1	1	1	1	1	1	5.92808e-08	1	1	1	1	1	1	1	5.37858e-08	0.999999	1	6.09817e-16	5.80885e-11	1	4.51832e-13	1	1	0.999991	0.999999	2.51006e-23	1	1
HMAN.Chr13	1	0.999952	2.00162e-14	1	0.000104669	0.999996	9.3361e-57	1	0.999999	1	0.999987	1	1	1	0.999999	1	1	0.999998	0.440145	0.99998	3.34861e-29	1	1	1	1	1	1	0.999999	1	1	1	1	1	1	3.99607e-38	1	0.999999	1	0.999975	1	1	0.99999	1	1	0.999991	0.999999	1	1	1
HNIP.Chr1	1	1	6.30175e-66	1	0.999882	9.96013e-10	0.999999	1	1	1	3.79157e-06	1	1	1	0.999993	1	1	1	1	1	0.999969	1	1	0.999991	1	1	0.999993	1.9006e-05	1	1	1	1	2.53962e-08	0.106992	1	1	0.999992	3.99784e-10	1	1	1	1	8.24128e-08	5.38424e-40	1	1	2.82671e-13	1	0.491936
HNIP.Chr2	1	1	1	1	0.999882	0.999998	0.999999	1	1	1	1.10943e-30	1	1	1	0.999993	1	1	1	1	1	0.999969	0.00138421	1	4.43768e-15	1	1	0.999993	1	1	1.21419e-13	1	1	2.77885e-07	1.31763e-32	1	1	0.999992	0.999982	1	1	1	0.0756663	1	0.999999	5.27271e-08	1	4.09402e-11	1	7.86747e-39
HNIP.Chr3	3.75467e-06	1	1	1	0.999882	6.3332e-22	0.999999	1	9.30693e-14	1	1	3.26058e-21	1	1	0.999993	1	8.16425e-27	1	1.53845e-11	0.213151	0.0717749	1	1	0.999991	2.09178e-29	1	0.999993	1	1	1	2.89651e-33	1	1	1	1	1	0.999992	0.999982	1	1	1	1	1	0.999999	1	1	1	1	1
HNIP.Chr4	1	1	1	1	0.999882	0.999998	0.999999	1	1	1	1	1	1	1	0.999993	1	1	1	2.64294e-20	2.31944e-55	2.94631e-26	0.000614833	1	4.35615e-12	1	1	0.999993	1	1	0.0020912	5.76983e-18	1	1	0.0850254	2.26896e-25	1	0.999992	0.999982	0.00342191	1	1	1	2.15725e-21	0.999999	1	1	1	2.07546e-17	1
HNIP.Chr5	1	2.91844e-47	1	3.65556e-09	9.44465e-41	0.999998	0.999999	1.89802e-16	1	1	1	2.19333e-40	1	1	0.999993	1	1	1	1	1	0.999969	1	1	0.999991	1	1	0.999993	1	1	1	1	1	1	1	1	1	4.73557e-65	0.999982	1	1	1	1	1	0.999999	1	1	1	1	1
HNIP.Chr6	1.7411e-13	1	1	1	0.999882	0.999998	1.00561e-71	2.8475e-05	1.31223e-07	1	1	1	1	1.66045e-14	0.999993	1	0.720145	3.96878e-08	1	1	0.999969	1	1	0.999991	1.54243e-05	1	0.999993	1	4.74613e-07	1	1	1	0.666947	1	1	1.92259e-13	0.999992	0.999982	1	1	1	1	1	0.999999	1	8.75086e-07	1	1	0.000964886
HNIP.Chr7	1	0.0417805	1	1	0.999882	0.999998	0.999999	1.03621e-05	1	1	1	1	1	1.12172e-12	0.999993	1	1	1	1	1	0.999969	1	1	0.999991	1	8.90547e-91	0.999993	2.97649e-25	1	1	1	1	1	1	1	9.61756e-30	0.999992	0.999982	1	1	1	1	1	0.00268753	1	1	4.26522e-27	1	1
HNIP.Chr8	1	1	1	1	0.999882	0.999998	0.999999	1	1	1	1	1	1	1	0.999993	1	1	1	1	1	0.999969	1	1	0.999991	2.56582e-06	1	0.999993	0.00122109	1	1	1	1	1.84796e-07	0.0025696	1	1	0.999992	9.65917e-30	2.48001e-05	9.71435e-70	2.25838e-40	1	1	0.999999	1	1	1	4.35536e-07	1
HNIP.Chr9	1	1	1	1	0.999882	0.999998	0.999999	1	1	1	3.52982e-09	1	1	1	0.999993	1	1	1.42794e-68	1	1	0.999969	1	1	0.999991	1	1	0.999993	1	0.00611014	1	1	1	1	1	1.40503e-10	1	0.777668	0.999982	1	1	1	3.22907e-07	5.46593e-16	0.999999	2.92498e-59	8.75086e-07	1	1	1
HNIP.Chr10	1	1	1	1	0.999882	0.999998	0.999999	1	4.5893e-18	1	1	1	1	1	3.12243e-63	9.65898e-26	1.23195e-08	1	1	1	0.999969	1	2.62375e-07	0.999991	1	1	2.11975e-41	1	1	1	1	7.88056e-29	1	1	1	1	0.999992	0.999982	1.08384e-14	1	1	1	1	0.999999	1	1	1	1	1
HNIP.Chr11	1	1	1	1	0.999882	0.999998	0.999999	1	1	5.65639e-34	1	1	8.37743e-39	1	0.999993	5.01868e-26	1	1	1	1	0.999969	1	1.79139e-13	0.999991	1	0.000326717	1.00543e-16	1	1	1	1	1	1	1	1	1	0.999992	0.999982	3.78931e-15	1	1	1	1	0.999999	1	1	1	1	1
LLON.1	1	0.0916858	0.998916	0.6781	0.999799	1	0.000435953	0.124582	0.000308783	0.0858246	0.423588	0.0943951	0.999584	0.99716	0.981775	1	0.997482	1	0.959186	0.903288	0.997822	0.982782	0.999711	0.964712	0.998138	1	0.999945	0.976768	0.939409	0.999265	0.566758	0.999153	1	1	1	1	0.999897	1	1	0.796919	0.992369	1	0.93571	0.997714	0.996227	1	0.936151	0.964477	0.997096
LLON.2	0.0306438	0.0158797	0.140137	0.165091	6.50493e-06	0.299831	0.999867	0.273347	0.999979	0.650705	0.995798	1	0.893331	0.99716	0.981775	1	0.768738	1	0.959186	0.637005	0.997822	0.982782	0.784165	0.964712	0.998138	1	0.999945	0.976768	0.947289	0.999265	0.989995	0.999153	1	1	1	1	0.999897	0.949502	1	1	0.493124	1	0.941187	0.965324	0.571832	1	0.986996	0.964477	0.997096
LLON.3	1	0.999845	0.499129	1	0.999799	1	0.615746	1	0.0217592	0.999859	0.995798	1	0.00784062	0.0322159	0.279376	0.151547	0.0590134	0.209747	0.879199	0.998206	0.997822	0.982782	0.91854	0.964712	0.836374	1	0.914549	0.976768	0.988596	0.999265	0.989995	0.999153	1	1	1	1	0.999897	1	0.27415	1	0.992369	1	0.93571	0.965324	0.571832	0.0643253	0.936151	0.943656	0.997096
LLON.4	1	0.999845	0.998916	1	0.999799	0.676228	0.368429	1	0.999979	0.999859	0.981218	0.289711	0.999584	0.417172	0.981775	1	0.997482	1	0.542376	0.120753	0.000530774	0.0335714	0.999711	0.964712	0.998138	1	0.07509	0.16832	0.947289	0.999265	0.286169	0.999153	1	1	1	1	0.0146127	1	1	1	0.992369	1	0.93571	0.965324	0.996227	1	0.936151	0.943656	0.814671
LLON.5	1	0.999845	0.998916	0.6781	0.999799	1	0.999867	1	0.999979	0.999859	0.981218	0.887365	0.999584	0.99716	0.981775	1	0.768738	1	0.959186	0.998206	0.997822	0.982782	0.00568251	0.27409	0.196036	0.309003	0.999945	0.976768	0.947289	0.999265	0.989995	0.491583	1	0.172646	1	1	0.0562486	0.949502	0.27415	1	0.357531	1	0.93571	0.956882	0.996227	1	0.936151	0.943656	0.997096
LLON.6	1	0.0606633	0.998916	1	0.999799	1	0.285712	1	0.999979	0.999859	0.981218	0.887365	0.999584	0.978804	0.803658	0.418885	0.997482	1	0.879199	0.998206	0.997822	0.982782	0.977324	0.964712	0.243267	1	0.999945	0.976768	0.988596	1	0.989995	0.0938341	1	1	1	1	0.00275042	1	0.961305	0.796919	0.992369	1	0.93571	0.965324	0.996227	1	0.936151	0.810823	0.997096
LLON.7	1	0.999845	0.998916	1	0.999799	1	0.999867	1	0.920095	0.834308	0.423588	1	0.137131	0.417172	0.981775	1	0.997482	0.209747	0.879199	0.903288	0.997822	0.982782	0.999711	0.964712	0.998138	0.309003	0.73477	0.976768	0.947289	0.410007	0.286169	0.999153	1	1	1	1	0.734676	1	0.993352	1	0.992369	1	0.93571	0.965324	0.571832	1	0.628441	0.943656	0.814671
LLON.8	1	0.999845	0.998916	0.6781	0.999799	1	0.999867	0.124582	0.999979	0.223857	0.643752	0.329732	0.893331	0.417172	0.981775	1	0.997482	1	0.959186	0.998206	0.101168	0.982782	0.999711	0.964712	0.998138	1	0.999945	0.976768	0.947289	0.999265	0.989995	0.999153	0.0111831	0.0466815	0.0353976	1	0.999897	0.216281	0.27415	0.796919	0.992369	1	0.93571	0.965324	0.571832	1	0.936151	0.964428	0.997096
LLON.9	1	0.999845	0.998916	1	0.999799	1	0.262681	1	0.999979	0.198917	0.643752	1	0.999584	0.660265	0.981775	0.418885	0.768738	0.894651	0.959186	0.998206	0.101168	0.982782	0.999711	0.964712	0.998138	1	0.999945	0.976768	0.988596	1	0.566758	0.999153	1	1	0.120175	3.48733e-05	0.750163	1	1	0.796919	0.992369	1	0.941187	0.965324	0.996227	1	0.986996	0.810823	0.544624
LLON.10	1	0.817339	0.956351	1	0.999799	1	0.999867	1	0.999979	0.999859	0.995798	1	0.999584	0.978804	0.981775	1	0.997482	1	0.879199	0.844639	0.997822	0.982782	0.388436	0.964712	0.849047	1	0.999945	0.976768	0.939409	0.999265	0.989995	0.999153	1	1	1	1	0.999897	0.216281	0.0366341	0.796919	0.103407	0.302849	0.941187	0.965324	0.571832	1	0.936151	0.943656	0.814671
LLON.11	1	0.999845	0.998916	0.690825	0.999799	1	0.999867	1	0.999979	0.999859	0.995798	0.688145	0.999584	0.99716	0.981775	0.418885	0.997482	1	0.959186	0.303188	0.997822	0.101706	0.999711	0.964712	0.486962	0.00140496	0.07509	0.000130282	0.111235	0.999265	0.989995	0.491583	1	1	1	0.990639	0.398329	1	1	1	0.992369	1	0.93571	0.965324	0.990289	1	0.661875	0.943656	0.825519
LLON.12	0.245524	0.278367	0.152863	1	0.774723	1	0.999867	1	0.999979	0.999859	0.995798	1	0.999584	0.99716	0.981775	1	0.768738	1	0.864842	0.903288	0.997822	0.982782	0.204793	0.964712	0.998138	1	0.781523	0.976768	0.768659	0.999265	0.802823	0.999153	1	1	0.504763	0.990639	0.999897	0.949502	1	0.796919	0.717051	1	0.492533	0.245294	0.571832	1	0.936151	0.964477	0.997096
LLON.13	0.485128	0.980767	0.998916	0.6781	0.999799	0.299831	0.999867	1	0.999979	0.999859	0.428628	0.887365	0.999584	0.99716	0.981775	1	0.997482	1	0.864842	0.903288	0.997822	0.982782	0.784165	0.964712	0.998138	1	0.781523	0.976768	0.947289	0.999265	0.792819	0.999153	1	1	1	1	0.999897	1	1	1	0.992369	1	0.891308	0.787609	0.996227	0.00132916	0.661875	0.943656	0.054099
LLON.14	0.720608	0.999845	0.998916	1	0.999799	1	0.999867	1	0.999979	0.999859	0.995798	0.887365	0.999584	0.660265	0.981775	1	0.997482	1	0.959186	0.903288	0.929671	0.982782	0.784165	0.964712	0.998138	1	0.73477	0.976768	0.947289	0.999265	0.566758	0.999153	1	1	1	1	0.398329	1	1	1	0.535119	1	0.93571	0.965324	0.996227	1	0.936151	0.844348	0.997096
LLON.16	1	0.817339	0.998916	1	0.999799	1	0.999867	1	0.999979	0.999859	0.593245	0.688145	0.149871	0.660265	0.981775	1	0.837635	0.209747	0.930481	0.903288	0.997822	0.982782	0.9456	0.964712	0.438608	1	0.908604	0.976768	0.947289	0.999265	0.792819	0.999153	1	1	1	1	0.999897	1	1	1	0.14953	1	0.93571	0.965324	0.571832	1	0.986996	0.943656	0.814671
LLON.17	0.692817	0.999845	0.140137	0.241369	0.00330826	0.299831	0.999867	1	0.999979	0.999859	0.995798	1	0.999584	0.596217	0.981775	0.418885	0.997482	1	0.959186	0.903288	0.997822	0.982782	0.617855	0.964712	0.998138	1	0.999945	0.976768	0.988596	0.999265	0.989995	0.999153	1	0.611854	0.504763	1	0.00118849	1	1	1	0.357531	1	0.891308	0.245294	0.996227	1	0.936151	0.943656	0.997096
LLON.15	1	0.999845	0.998916	1	0.999799	1	0.999867	1	0.999979	0.999859	0.423588	1	0.999584	0.99716	0.981775	1	0.837635	1	0.959186	0.998206	0.986418	0.982782	0.0912586	0.964712	0.998138	1	0.07509	0.976768	0.947289	0.999265	0.989995	0.999153	1	1	1	1	0.999897	1	1	1	0.717051	1	0.93571	0.965324	0.571832	0.612266	0.986996	0.943656	0.814671
LLON.18	1	0.441343	0.998916	0.6781	0.848491	1	0.999867	1	0.999979	0.999859	0.981218	0.887365	0.999584	0.660265	0.981775	0.910453	0.997482	1	0.959186	0.903288	0.997822	0.982782	0.999711	0.964712	0.836374	1	0.781523	0.976768	0.947289	0.999265	0.303402	0.999153	1	1	1	1	0.999897	0.949502	1	1	0.992369	1	0.93571	0.965324	0.571832	1	0.936151	0.964477	0.018963
LLON.19	1	0.999845	0.976376	1	0.999799	0.299831	0.999867	1	0.999979	0.999859	0.981218	1	0.999584	0.99716	0.981775	1	0.997482	1	0.959186	0.903288	0.997822	0.982782	0.427951	0.964712	0.998138	1	0.258645	0.976768	0.111235	0.999265	0.989995	0.196035	1	0.611854	1	1	0.999897	1	0.27415	1	0.992369	1	0.93571	0.965324	0.996227	1	0.628441	0.0796695	0.997096
MVUL.MV001	1.13334e-27	8.14045e-115	3.8703e-36	4.24325e-59	4.32062e-76	2.56901e-47	3.99021e-107	6.64732e-10	1	1	1	1	1	1	1	1	1	1	1	1	1	1	1	1	1	1	1	1	1	1	1	1	1	1	1	1	1	1	1	1	1	1	1	1	1	1	1	1	1
MVUL.MV002	1	1	1	1	1	1	1	1	1.11705e-30	2.93814e-51	5.13983e-78	1.56126e-71	6.56374e-28	9.1865e-127	1	1	1	1	1	1	1	1	1	1	1	1	1	1	1	1	1	1	1	1	1	1	1	1	1	1	1	1	1	1	1	1	1	1	1
MVUL.MV003	1	1	1	1	1	1	1	1	1	2.65429e-80	1	1.69963e-80	7.20805e-56	2.63192e-167	1	1	1	1	1	1	1	1	1	1	1	1	1	1	1	1	1	1	1	1	1	1	1	1	1	1	1	1	1	1	1	1	1	1	1
MVUL.MV004	1	1	1	1	1	1	1	1	1	1	1	1	1	1	4.83184e-83	2.57573e-98	2.15888e-102	2.89424e-25	5.3801e-39	1	1	1	1	1	1	1	1	1	1	1	1	1	1	1	1	1	1	1	1	1	1	1	1	1	1	1	1	1	1
MVUL.MV005	1.50691e-80	1.95277e-175	4.98724e-59	3.95969e-43	1	1	1	1	1	1	1	1	1	1	1	1	1	1	1	1	1	1	1	1	1	1	1	1	1	1	1	1	1	1	1	1	1	1	1	1	1	1	1	1	1	1	1	1	1
MVUL.MV006	1	1	1	1	1	1	1	1	1	1	1	1	1	1	1	1	1	1	1	1	1	1	1	1	1	1	1	1	1	1	1	2.04679e-51	9.6887e-132	8.69166e-138	1	1	1	1	1	1	1	1	1	1	1	1	1	1	1
MVUL.MV007	1	1	1	1	1	1	1	1	1	1	1	1	1	1	1	1	1	1	1	1	1	3.66731e-234	4.57329e-33	1.23932e-90	1	1	1	1	1	1	1	1	1	1	1	1	1	1	1	1	1	1	1	1	1	1	1	1	1
MVUL.MV008	1	1	1	1	1	1	1	1	1	1	1	1	1	1	1	1	1	1	1	1	1	1	1	1	1	1	1	1	1	1.5547e-107	1.35943e-219	1	1	1	1	1	1	1	1	1	1	1	1	1	1	1	1	1	1
MVUL.MV009	1	1	1	1	1	1	1	1	1	1	1	1	1	1	1	1	1	1	1	1	1	1	1	1	1.20654e-26	1.56543e-176	8.25108e-134	1	1	1	1	1	1	1	1	1	1	1	1	1	1	1	1	1	1	1	1	1	1
MVUL.MV010	1	1	1	1	1	1	1	1	1	1	1	1	1	1	1	1	1	1	1	2.20442e-113	3.13614e-250	1	1	1	1	1	1	1	1	1	1	1	1	1	1	1	1	1	1	1	1	1	1	1	1	1	1	1	1
MVUL.MV011	1	1	1	1	1	1	1	1	1	1	1	1	1	1	1	1	1	1	1	1	1	1	1	1	1	1	1	1	1	1	1	1.73004e-40	2.94087e-89	4.14732e-155	1	1	1	1	1	1	1	1	1	1	1	1	1	1	1
MVUL.MV012	1	1	1	1	1	1	1	1	1	1	1	1	1	1	1	1	1	1	1	1	1	1	1	1	1	1	1	2.87758e-184	3.49071e-128	1	1	1	1	1	1	1	1	1	1	1	1	1	1	1	1	1	1	1	1
MVUL.MV013	1	1	1	1	1	1	1	1	1	1	1	1	1	1	5.33416e-52	1.33695e-68	3.47503e-120	1.64999e-100	1	1	1	1	1	1	1	1	1	1	1	1	1	1	1	1	1	1	1	1	1	1	1	1	1	1	1	1	1	1	1
MVUL.MV014	1	1	1	1	1	1	1	1	1	1	1	1	1	1	1	1	1	1	1	1	1	1	1	1	1	1	1	1	1	6.29391e-89	2.27791e-240	1	1	1	1	1	1	1	1	1	1	1	1	1	1	1	1	1	1
MVUL.MV015	1	1	1	1	1	1	1	1	1	1	1	1	1	1	1	1	1	1	1	1	1	1	1	1	1.47844e-37	7.20104e-156	1.36381e-104	1	1	1	1	1	1	1	1	1	1	1	1	1	1	1	1	1	1	1	1	1	1
MVUL.MV016	1	1	1	1	1	1	1	1	1	1	1	1	1	1	1	1	1	1	1	1	1	1	1	1	1	1	1	2.0403e-223	3.92511e-117	1	1	1	1	1	1	1	1	1	1	1	1	1	1	1	1	1	1	1	1
MVUL.MV017	1	1	1	1	1	1	1	1	1	1	1	1	1	1	1	1	1	1	1	2.30499e-105	1.19206e-204	1	1	1	1	1	1	1	1	1	1	1	1	1	1	1	1	1	1	1	1	1	1	1	1	1	1	1	1
MVUL.MV018	1	1	1	1	1	1	1	1	1	1	1	1	1	1	1	1	1	1	1	1	1	1	1	1	1	1	1	1	1	1	1	1	1	1	1	1	1	1	1	1	1	1	1	1	1	1	1	1	1
MVUL.MV019	1	1	1	1	1	1	1	1	1	1	1	1	1	1	1	1	1	1	1	1	1	2.0898e-203	1.29081e-22	6.02509e-67	1	1	1	1	1	1	1	1	1	1	1	1	1	1	1	1	1	1	1	1	1	1	1	1	1
MVUL.MV020	1	1	1	1	1	1	1	1	1	1	1	1	1	1	1	1	1	1	1	1	1	1	1	1	1	1	1	1	1	1	1	1	1	1	1	1	1	1.48694e-251	7.20236e-61	1	1	1	1	1	1	1	1	1	1
MVUL.MV021	1	1	1	1	1	1	1	1	1	1	1	1	1	1	1	1	1	1	1	1	1	1	1	1	1	1	1	1	1	1	1	1	1	1	1	1	1	1	1	1	1	1	1	1	4.69519e-170	1.92144e-98	1	1	1
MVUL.MV022	1	1	1	1	1	1	1	1	1	1	1	1	1	1	1	1	1	1	1	1	1	1	1	1	1	1	1	1	1	1	1	1	1	1	1	1	1	1	1	0	1	1	1	1	1	1	1	1	1
MVUL.MV023	1	1	1	1	1	1	1	1	1	1	1	1	1	1	1	1	1	1	1	1	1	1	1	1	1	1	1	1	1	1	1	1	1	1	1	1	1	1	1	1	1	1	1	1	1	1	1	1	1
MVUL.MV024	1	1	1	1	1	1	1	1	1	1	1	1	1	1	1	1	1	1	1	1	1	1	1	1	1	1	1	1	1	1	1	1	1	1	1	1	1	2.90565e-209	3.71221e-65	1	1	1	1	1	1	1	1	1	1
MVUL.MV025	1	1	1	1	3.19069e-158	1.42118e-155	1	1	1	1	1	1	1	1	1	1	1	1	1	1	1	1	1	1	1	1	1	1	1	1	1	1	1	1	1	1	1	1	1	1	1	1	1	1	1	1	1	1	1
MVUL.MV026	1	1	1	1	1	1	1	1	1	1	1	1	1	1	1	1	1	1	1	1	1	1	1	1	1	1	1	1	1	1	1	1	1	1	1	1	0	1	1	1	1	1	1	1	1	1	1	1	1
MVUL.MV027	1	1	1	1	1	1	1	1	1	1	1	1	1	1	1	1	1	1	1	1	1	1	1	1	1	1	1	1	1	1	1	1	1	1	1	1	1	1	1	0	1	1	1	1	1	1	1	1	1
MVUL.MV028	1	1	1	1	1	1	1	1	1	1	1	1	1	1	1	1	1	1	1	1	1	1	1	1	1	1	1	1	1	1	1	1	1	1	1	1	1	1	1	1	1	1	4.50005e-269	1	1	1	1	1	1
MVUL.MV029	1	1	1	1	1	1	1	1	1	1	1	1	1	1	1	1	1	1	1	1	1	1	1	1	1	1	1	1	1	1	1	1	1	1	1	1	0	1	1	1	1	1	1	1	1	1	1	1	1
MVUL.MV030	1	1	1	1	1	1	1	1	1	1	1	1	1	1	1	1	1	1	1	1	1	1	1	1	1	1	1	1	1	1	1	1	1	1	1	1	1	1	1	1	4.43649e-72	1.76363e-216	1	1	1	1	1	1	1
MVUL.MV031	1	1	1	1	1	1	1	1	1	1	1	1	1	1	1	1	1	1	1	1	1	1	1	1	1	1	1	1	1	1	1	1	1	1	2.2829e-159	6.53588e-178	1	1	1	1	1	1	1	1	1	1	1	1	1
MVUL.MV032	1	1	1	1	1	1	1	1	1	1	1	1	1	1	1	1	1	1	1	1	1	1	1	1	1	1	1	1	1	1	1	1	1	1	1	1	1	1	1	1	1	1	1	1	4.98518e-155	9.2851e-107	1	1	1
MVUL.MV033	1	1	1	1	1	1	1	1	1	1	1	1	1	1	1	1	1	1	1	1	1	1	1	1	1	1	1	1	1	1	1	1	1	1	1	1	1	1	1	1	1	1	1	0	1	1	1	1	1
MVUL.MV034	1	1	1	1	1	1	1	1	4.577e-71	1	1.19785e-248	1	1	1	1	1	1	1	1	1	1	1	1	1	1	1	1	1	1	1	1	1	1	1	1	1	1	1	1	1	1	1	1	1	1	1	1	1	1
MVUL.MV035	1	1	1	1	1	1	1	1	1	1	1	1	1	1	1	1	1	1	1	1	1	1	1	1	1	1	1	1	1	1	1	1	1	1	1	1	1	1	1	1	1	1	1	1.98942e-271	1	1	1	1	1
MVUL.MV036	1	1	1	1	1	1	1	1	1	1	1	1	1	1	1	1	1	1	1	1	1	1	1	1	1	1	1	1	1	1	1	1	1	1	1	1	1	1	1	1	1	1	0	1	1	1	1	1	1
MVUL.MV037	1	1	1	1	1	1	1	1	1	1	1	1	1	1	1	1	1	1	1	1	1	1	1	1	1	1	1	1	1	1	1	1	1	1	1	1	1	1	1	1	2.4666e-91	2.78595e-185	1	1	1	1	1	1	1
MVUL.MV038	1	1	1	1	1	1	1	1	1	1	1	1	1	1	1	1	1	1	1	1	1	1	1	1	1	1	1	1	1	1	1	1	1	1	1	1	1	1	1	1	1	1	1	1	1	1	2.2297e-167	2.6699e-47	1.08036e-45
MVUL.MV039	1	1	1	1	1	1	1	1	1	1	1	1	1	1	1	1	1	1	1	1	1	1	1	1	1	1	1	1	1	1	1	1	1	1	1.95615e-59	5.12554e-195	1	1	1	1	1	1	1	1	1	1	1	1	1
MVUL.MV040	1	1	1	1	1	1	1	1	1	1	1	1	1	1	1	1	1	1	1	1	1	1	1	1	1	1	1	1	1	1	1	1	1	1	1	1	1	1	1	1	1	1	1	1	1	1	3.03963e-136	3.01729e-51	9.52807e-61
MVUL.MV041	1	1	1	1	1	1	8.70177e-248	3.3712e-37	1	1	1	1	1	1	1	1	1	1	1	1	1	1	1	1	1	1	1	1	1	1	1	1	1	1	1	1	1	1	1	1	1	1	1	1	1	1	1	1	1
NNAJ.chr_1	0	6.60487e-191	1.42662e-239	0	1	1	1	1	1	1	1	1	1	1	1	1	1	1	1	1	1	1	1	1	1	1	1	1	1	1	1	1	1	1	1	1	1	1	1	1	1	1	1	1	1	1	1	1	1
NNAJ.chr_2	1	1	1	1	1	1	1	1	1	1	1	1	1	1	1	1	1	1	1	1	1	1	1	1	1	1	1	1	1	1	1	1	1	1	1	1	1	1	1	1	7.01356e-118	3.4482e-197	1.13894e-195	3.99954e-155	1	1	1	1	1
NNAJ.chr_3	1	1	1	1	1	1	1	1	2.36088e-293	1.18161e-57	3.33834e-286	0	1	1	1	1	1	1	1	1	1	1	1	1	1	1	1	1	1	1	1	1	1	1	1	1	1	1	1	1	1	1	1	1	1	1	1	1	1
NNAJ.chr_4	1	1	1	1	0	0	5.08938e-220	1.15369e-146	1	1	1	1	1	1	1	1	1	1	1	1	1	1	1	1	1	1	1	1	1	1	1	1	1	1	1	1	1	1	1	1	1	1	1	1	1	1	1	1	1
NNAJ.chr_5	1	1	1	1	1	1	1	1	1	1	1	1	1	1	1	0	0	1	1	1	1	1	1	1	1	1	1	1	1	1	1	1	1	1	1	1	1	1	1	1	1	1	1	1	1	1	1	1	1
NNAJ.chr_6	1	1	1	1	1	1	1	1	1	1	1	1	0	6.65473e-202	0	1	1	1	1	1	1	1	1	1	1	1	1	1	1	1	1	1	1	1	1	1	1	1	1	1	1	1	1	1	1	1	1	1	1
NNAJ.chr_7	1	1	1	1	1	1	1	1	1	1	1	1	1	1	1	1	1	8.1246e-276	3.59443e-154	0	1	1	1	1	1	1	1	1	1	1	1	1	1	1	1	1	1	1	1	1	1	1	1	1	1	1	1	1	1
NNAJ.chr_8	1	1	1	1	1	1	1	1	1	1	1	1	1	1	1	1	1	1	1	1	1	1	1	2.80727e-218	6.61592e-238	1.37159e-32	1.75043e-113	1.08063e-194	1	1	1	1	1	1	1	1	1	1	1	1	1	1	1	1	1	1	1	1	1
NNAJ.chr_9	1	1	1	1	1	1	1	1	1	1	1	1	1	1	1	1	1	1	1	1	1.60935e-278	9.22833e-196	0	1	1	1	1	1	1	1	1	1	1	1	1	1	1	1	1	1	1	1	1	1	1	1	1	1	1
NNAJ.chr_10	1	1	1	1	1	1	1	1	1	1	1	1	1	1	1	1	1	1	1	1	1	1	1	1	1	1	1	1	1	1	1	1	1	1	5.29759e-136	0	1	1	1	1	1	1	1	1	1	1	1	1	1
NNAJ.chr_11	1	1	1	1	1	1	1	1	1	1	1	1	1	1	1	1	1	1	1	1	1	1	1	1	1	1	1	1	1	1	1	1	1	1	1	1	1	1	1	1	1	1	1	1	0	8.75062e-87	1	1	1
NNAJ.chr_12	1	1	1	1	1	1	1	1	1	1	1	1	1	1	1	1	1	1	1	1	1	1	1	1	1	1	1	1	1.75889e-301	9.69464e-64	9.60875e-227	1.87195e-178	1	1	1	1	1	1	1	1	1	1	1	1	1	1	1	1	1
NNAJ.chr_13	1	1	1	1	1	1	1	1	1	1	1	1	1	1	1	1	1	1	1	1	1	1	1	1	1	1	1	1	1	1	1	1	0	1.32645e-266	1	1	1	1	1	1	1	1	1	1	1	1	1	1	1
NNAJ.chr_14	1	1	1	1	1	1	1	1	1	1	1	1	1	1	1	1	1	1	1	1	1	1	1	1	1	1	1	1	1	1	1	1	1	1	1	1	3.01311e-109	1.15023e-160	2.50828e-131	0	1	1	1	1	1	1	1	1	1
NNAJ.chr_15	1	1	1	1	1	1	1	1	1	1	1	1	1	1	1	1	1	1	1	1	1	1	1	1	1	1	1	1	1	1	1	1	1	1	1	1	1	1	1	1	1	1	1	1	1	1	1	1	0
NNAJ.chr_16	1	1	1	1	1	1	1	1	1	1	1	1	1	1	1	1	1	1	1	1	1	1	1	1	1	1	1	1	1	1	1	1	1	1	1	1	1	1	1	1	1	1	1	1	1	1	1	1	1
NNAJ.chr_17	1	1	1	1	1	1	1	1	1	1	1	1	1	1	1	1	1	1	1	1	1	1	1	1	1	1	1	1	1	1	1	1	1	1	1	1	1	1	1	1	1	1	1	1	1	1	0	0	1
OFUS.CAIIXF020000001.1	0.00730109	0.683035	0.222073	0.232908	0.94453	0.874771	0.954775	0.995916	0.997817	0.953561	0.918793	0.981662	0.906669	0.855213	0.997437	0.958484	0.966651	0.974088	1	0.559823	0.978363	0.98431	0.99163	0.977591	0.768332	0.99464	0.998164	0.733138	0.992909	0.993615	0.82156	0.578755	0.995487	0.978578	0.356812	0.551476	0.176098	0.952249	0.538793	0.492445	0.978791	0.989638	0.935289	0.82321	0.976355	0.749285	0.95171	0.999323	0.691779
OFUS.CAIIXF020000005.1	1	0.987202	0.222073	0.0265605	0.631026	0.874771	0.223865	0.015857	0.997817	0.953561	0.999713	0.980249	1	0.400624	0.755922	0.838775	0.966651	0.974088	1	0.559823	0.99771	0.98431	0.99163	0.977591	0.547972	0.922333	0.998164	0.936044	0.540059	0.195819	0.878	0.96833	0.0534653	0.978578	0.96165	0.83449	0.997774	0.952249	0.6788	0.997202	0.978791	0.989638	0.935289	0.996864	0.976355	0.88411	0.962682	0.785993	0.952306
OFUS.CAIIXF020000006.1	0.42874	0.706877	0.975047	0.0265605	0.631026	0.874771	0.954775	0.995916	0.997817	0.953561	0.918793	0.980249	0.128248	0.999938	0.997437	0.725327	0.966651	0.974088	1	0.997172	0.0881257	0.00726409	0.195811	0.0782383	0.99552	0.701477	0.998164	0.936044	0.785728	0.993615	0.937454	0.96833	0.995487	0.978578	0.96165	0.999272	0.997774	0.952249	0.6788	0.624548	0.978791	0.746907	0.591131	0.269454	0.993423	1	0.962682	0.999323	0.944578
OFUS.CAIIXF020000007.1	1	0.964448	0.735015	0.999863	0.631026	0.874771	0.954775	0.995916	0.997817	0.953561	0.725328	0.980249	0.906669	0.836144	0.997437	0.958484	0.928398	0.812309	1	0.763276	0.978363	0.98431	0.99163	0.977591	0.169459	0.306805	0.998164	0.936044	0.992909	0.993615	0.82156	0.96833	0.995487	0.978578	0.96165	0.999272	0.872177	0.952249	0.6788	0.492445	0.978791	0.276644	0.886387	0.784598	0.977544	1	0.386317	0.785993	0.936941
OFUS.CAIIXF020000008.1	1	0.964448	0.975047	0.999863	0.631026	0.874771	0.954775	0.995916	0.00431934	0.953561	0.999713	0.980249	1	0.159714	0.00136642	0.338521	0.127386	0.198758	0.238599	0.0070558	0.99771	0.98431	0.99163	0.794351	0.99552	0.922333	0.998164	0.936044	0.540059	0.993615	0.878	0.96833	0.995487	0.59885	0.96165	0.551476	0.997774	0.952249	0.99578	0.593536	0.785838	0.989638	0.935289	0.996864	0.849723	0.568572	0.962682	0.999323	0.944578
OFUS.CAIIXF020000009.1	1	0.964448	0.975047	0.999863	0.631026	0.874771	0.879019	0.995916	2.98949e-06	0.100615	0.0506752	0.0152985	0.025327	0.00725047	0.997437	0.958484	0.966651	0.198758	1	0.99836	0.978363	0.98431	0.99163	0.714063	0.547065	0.914181	0.998164	0.936044	0.992909	0.0482151	0.937454	0.96833	0.995487	0.978578	0.96165	0.999272	0.997774	0.952249	0.99578	0.997202	0.978791	0.989638	0.935289	0.996864	0.896082	1	0.962682	0.999323	0.944578
OFUS.CAIIXF020000010.1	1	0.987202	0.975047	0.999863	0.94453	0.874771	0.954775	0.995916	0.997817	0.953561	0.999713	0.980249	1	0.999938	0.997437	0.958484	0.928398	0.812309	1	0.99836	0.978363	0.98431	0.556622	0.609065	0.759462	0.306805	0.000307674	0.733138	0.348751	0.0215978	0.82156	0.96833	0.995487	0.978578	0.610031	0.999272	0.997774	0.952249	0.99578	0.593536	0.978791	0.746907	0.886387	0.996864	0.849723	1	0.95171	0.785993	0.936941
OFUS.CAIIXF020000011.1	1	0.987202	0.975047	0.398122	0.94453	0.874771	0.954775	0.0840771	0.997817	0.953561	0.725328	0.980249	0.833596	0.999938	0.55348	0.958484	0.323108	0.812309	1	0.99836	0.978363	0.19218	0.556622	0.775537	0.99552	0.922333	0.998164	0.936044	0.940641	0.993615	0.987164	0.96833	0.12812	0.978578	0.96165	0.999272	0.997774	0.612092	0.538793	0.0252399	0.332038	0.989638	0.591131	0.11489	0.976355	0.749285	0.962682	0.999323	0.952306
OFUS.CAIIXF020000012.1	0.42874	0.987202	0.975047	0.999863	0.94453	0.874771	0.954775	0.995916	0.997817	0.953561	0.999713	0.980249	0.41805	0.999938	0.684844	0.958484	0.928398	0.771865	1	0.99836	0.99771	0.98431	0.99163	0.714063	0.99552	0.701477	0.0032348	0.997365	0.992909	0.691217	0.82156	0.96833	0.845357	0.948858	0.96165	0.882286	0.997774	0.952249	0.893914	0.997202	0.671121	0.0889513	0.486953	0.0417709	0.326762	1	0.962682	0.785993	0.944578
OFUS.CAIIXF020000002.1	1	0.683035	0.975047	0.873626	0.631026	0.973531	0.954775	0.957561	0.997817	0.953561	0.999713	0.980249	1	0.0183253	0.997437	0.725327	0.323108	0.974088	1	0.559823	0.0907991	0.98431	0.556622	0.977591	0.547065	0.99464	0.998164	0.997365	0.992909	0.993615	0.878	0.96833	0.995487	0.523215	0.96165	0.882286	0.997774	0.952249	0.99578	0.997202	0.978791	0.989638	0.886387	0.996864	0.849723	0.543328	0.229453	0.00119079	0.364628
OFUS.CAIIXF020000003.1	1	0.964448	0.975047	0.196391	0.631026	0.874771	0.954775	0.874491	0.997817	0.953561	0.725328	0.980512	1	0.999938	0.997437	0.582819	0.928398	0.812309	1	0.99836	0.99771	0.98431	0.99163	0.714063	0.99552	0.914181	0.998164	0.936044	0.992909	0.993615	0.82156	0.0844505	0.00264691	0.00628666	0.147525	0.204046	0.0762998	0.952249	0.538793	0.997202	0.332038	0.989638	0.935289	0.996864	0.849723	1	0.95171	0.785993	0.952306
OFUS.CAIIXF020000004.1	1	0.964448	0.966335	0.999863	0.631026	0.874771	0.954775	0.995916	0.997817	0.953561	0.999713	0.980249	0.906669	0.999938	0.997437	0.838775	0.966651	0.974088	1	0.99836	0.978363	0.98431	0.99163	0.775537	0.99552	0.914181	0.998164	0.997365	0.540059	0.6045	0.82156	0.96833	0.995487	0.978578	0.96165	0.882286	0.964037	0.952249	0.99578	0.492445	0.671121	0.989638	0.591131	0.0417709	0.326762	1	0.962682	0.999323	0.936941
PECH.Superscaffold1	0.413127	0.891914	0.991356	0.936548	0.887193	0.912071	0.45971	1	0.998182	0.915482	0.843704	0.979648	0.831522	0.98419	0.999385	0.589018	0.709643	0.978984	0.10783	0.775113	1	0.937625	0.615936	0.997454	0.848028	0.999397	0.947044	0.897902	0.917525	1	0.988849	0.061257	0.977454	0.998314	0.961103	0.893799	0.999557	0.994127	0.994774	0.438755	0.677934	0.659133	1	0.995988	0.970184	0.970134	0.760263	0.362248	0.850928
PECH.Superscaffold2	0.413127	0.97847	0.991356	0.626552	0.887193	0.912071	0.987033	0.00540397	0.0490959	0.209745	0.0669934	0.777736	0.842654	0.98419	0.998309	1	0.996695	0.978984	0.119644	0.799531	1	0.937625	0.974075	0.997454	0.980057	0.996829	0.947044	0.997299	0.820256	0.258564	0.988849	0.997513	0.977454	0.998314	0.961103	0.978525	0.00128992	0.885007	0.994774	0.999174	0.99594	1	1	0.995988	0.970184	0.921064	0.997779	0.997144	0.850928
PECH.Superscaffold5	0.998245	0.556024	0.991356	0.936548	0.887193	0.912071	0.650407	1	0.998182	0.915482	0.958819	0.363112	0.00149043	0.000548525	0.128053	0.695523	0.996695	0.84191	0.997885	0.995145	1	0.937625	0.974075	0.901039	0.980057	0.996829	0.7653	0.997299	0.917525	1	0.988849	0.997513	0.977454	0.998314	0.961103	1	0.999557	0.994127	0.0148216	0.999174	0.334071	1	0.0977128	0.777892	0.970184	0.921064	0.112311	0.997144	0.871354
PECH.Superscaffold3	0.413127	0.891914	0.753783	0.936548	0.887193	0.985563	0.987033	1	0.998182	0.915482	0.958819	0.929972	0.99988	0.38122	0.999385	1	0.843604	0.978984	0.997885	0.995145	0.547241	0.937625	0.974075	0.873263	0.980057	0.996829	0.947044	0.997299	0.820256	0.20488	0.00110925	0.997513	0.977454	0.427851	0.961103	0.893799	0.999557	0.885007	0.994774	0.999174	0.99594	0.418799	1	0.826365	0.970184	0.970134	0.907452	0.997144	0.555575
PECH.Superscaffold4	0.998245	0.97847	0.991356	0.936548	0.887193	1	0.987033	1	0.998182	0.971041	0.958819	1	0.0403793	0.98419	0.905596	1	0.996695	0.978984	0.580388	0.775113	1	0.937625	0.974075	0.33525	0.980057	0.983022	0.7653	0.997299	0.968086	1	0.231539	0.997513	0.682019	0.998314	0.442202	0.893799	0.000108933	0.25158	0.118777	0.999174	0.99594	1	1	0.676316	0.734952	0.760824	0.997779	0.954973	0.992083
PECH.Superscaffold7	0.183119	0.141213	0.125986	0.626552	0.887193	0.985563	0.987033	0.456635	0.998182	0.915482	0.0983116	0.927848	0.99988	0.98419	0.905596	1	0.917817	0.978984	0.997885	0.775113	1	0.937625	0.974075	0.997454	0.980057	0.983022	0.947044	0.0160961	0.820256	1	0.988849	0.997513	0.682019	0.86661	0.961103	0.893799	0.999557	0.819092	0.994774	0.999174	0.99594	0.659133	1	0.995988	0.734952	0.970134	0.997779	0.997144	0.992083
PECH.Superscaffold6	0.998245	0.891914	0.991356	0.936548	0.887193	0.994607	0.987033	1	0.0490959	0.915482	0.958819	0.777736	0.99988	0.98419	0.999385	1	0.917817	0.978984	0.997885	0.995145	0.772922	0.707611	0.272317	0.33525	0.0181321	0.215	0.7653	0.997299	0.917525	0.622805	0.826895	0.997513	0.977454	0.455517	0.961103	0.893799	0.999557	0.994127	0.994774	0.999174	0.99594	1	0.172052	0.52464	0.862731	0.760824	0.770672	0.997144	0.850928
PECH.Superscaffold8	0.998245	0.97847	0.991356	0.626552	0.996866	0.985563	0.987033	1	0.998182	0.971041	0.958819	1	0.0434338	0.38122	0.293357	0.589018	0.118137	0.0942579	0.0129733	0.48932	0.188647	0.937625	0.543017	0.997454	0.848028	1	0.947044	0.997299	0.991481	1	0.988849	0.061257	0.977454	0.656853	0.903682	0.893799	0.999557	0.994127	0.994774	0.311151	0.710664	1	1	0.995988	0.618727	0.29828	0.997779	0.997144	0.992083
PECH.Superscaffold10	0.413127	0.97847	0.881142	0.936548	0.887193	0.985563	0.557022	1	0.998182	0.93688	0.958819	1	0.99988	0.98419	0.796231	1	0.996695	0.84191	0.997885	0.775113	1	0.937625	0.543017	0.33525	0.980057	0.983022	0.947044	0.00775165	0.917525	0.851028	0.988849	0.997513	0.977454	0.86661	0.961103	1	0.00937019	0.994127	0.994774	0.999174	0.999585	0.84552	1	0.256379	0.734952	0.970134	0.997779	0.997144	0.850928
PECH.Superscaffold9	0.998245	0.891914	0.991356	0.626552	0.887193	0.912071	0.600512	0.928983	0.998182	0.915482	0.999994	1	0.99988	0.98419	0.293357	1	0.761353	0.84191	0.997885	0.995145	1	0.937625	0.974075	0.997454	0.980057	1	0.947044	0.0916391	0.968086	0.258564	0.988849	0.88025	0.682019	0.998314	0.529706	0.893799	0.999557	0.994127	0.994774	0.999174	0.746233	0.21407	0.0977128	0.232548	0.862731	0.995155	0.997779	0.436217	0.992083
PECH.Superscaffold11	0.413127	0.891914	0.991356	0.936548	0.887193	0.963958	0.987033	1	0.998182	0.915482	0.958819	1	0.99988	0.98419	0.905596	1	0.917817	0.84191	0.997885	0.775113	1	0.937625	0.982427	0.873263	0.980057	0.983022	0.7653	0.00957526	0.991481	0.258564	0.988849	0.997513	0.977454	0.427851	0.961103	0.893799	0.999557	0.994127	0.0148216	0.00337365	0.334071	0.84552	1	0.52464	0.970184	0.970134	0.997779	0.997144	0.850928
PECH.Superscaffold12	0.998245	0.891914	0.753783	0.936548	0.887193	0.994607	0.900029	1	0.998182	0.93688	0.999994	0.979648	0.99988	0.98419	0.794186	1	0.709643	0.0942579	0.997885	0.995145	1	0.937625	0.974075	0.873263	0.108087	0.961759	0.947044	0.997299	0.968086	1	0.988849	0.0397467	0.190057	0.0222637	0.0986926	0.895895	0.605329	0.885007	0.994774	0.999174	0.861674	1	0.2958	0.52464	0.970184	0.970134	0.997779	0.997144	0.992083
PECH.Superscaffold14	0.998245	0.556024	0.991356	0.936548	0.887193	0.985563	0.557022	1	0.998182	0.915482	0.958819	1	0.99988	0.98419	0.905596	1	0.996695	0.84191	0.997885	0.48932	0.772922	0.937625	0.974075	0.873263	0.0281938	0.999397	0.7653	0.619588	0.968086	1	0.988849	0.997513	0.977454	0.998314	0.321385	0.893799	0.999557	0.899429	0.118777	0.999174	0.99594	1	1	0.52464	0.970184	0.995155	0.997779	0.997144	0.992083
PECH.Superscaffold13	0.998245	0.97847	0.991356	0.936548	0.887193	0.985563	0.557022	0.928983	0.193554	0.915482	0.958819	1	0.0403793	0.38122	0.999385	0.695523	0.816055	0.978984	0.997885	0.995145	1	0.937625	0.999937	0.997454	0.980057	0.961759	0.7653	0.997299	0.968086	1	0.693269	0.997513	0.977454	0.998314	0.961103	0.893799	0.605329	0.885007	0.994774	0.311151	0.99594	1	1	0.995988	0.618727	0.29828	0.112311	0.00267901	0.555575
PMAX.NC_047015.1	0.12111	0.106334	0.197097	5.48096e-07	0.12487	8.89289e-06	1	1	0.99992	1	0.898579	0.994236	1	0.999455	0.993845	0.996347	1	0.998011	0.997652	0.999845	0.998973	1	0.529746	1	0.84314	0.996274	0.961591	0.999349	1	1	0.959724	0.97998	0.817897	1	0.979011	0.999318	0.0310783	0.985619	0.996914	0.939654	1	0.919651	0.995095	0.928848	0.998611	0.342605	0.99904	0.918	1
PMAX.NC_047016.1	0.991145	0.993558	1	0.999985	0.999303	0.99684	1	1	0.99992	1	0.268422	0.207974	0.177745	0.00696456	0.993845	0.996347	0.23434	0.654453	0.997652	0.249873	0.998973	1	0.998382	1	0.983296	0.996274	0.961591	0.999349	1	1	0.959724	0.854876	0.817897	0.493629	0.979011	0.144452	0.999416	0.717065	0.996914	0.992846	1	0.991888	0.848698	0.928848	0.183288	0.654278	0.99904	0.918	1
PMAX.NC_047017.1	0.991145	0.216834	1	0.749975	0.999303	0.000744797	0.0751216	0.486025	0.00887292	0.00752843	0.999516	0.994236	0.586838	0.999455	0.738259	0.996347	1	0.998011	0.274737	0.999845	0.261174	1	0.998382	1	0.859081	0.996274	0.994604	0.999349	1	1	1	0.763242	0.817897	1	0.979011	0.999318	0.999416	0.622791	0.747757	0.992846	1	0.963305	0.883451	0.936703	0.998611	0.990268	0.99904	0.926286	0.994857
PMAX.NC_047018.1	0.991145	0.993558	1	0.749975	0.812545	0.99684	1	1	0.99992	0.0996398	0.999516	0.847426	0.490916	0.00270829	0.0113975	0.000137496	0.23434	0.160758	0.997652	0.999845	0.998973	1	0.584077	1	0.84314	0.11424	0.961591	0.322323	1	1	1	0.712326	0.975235	1	0.416821	0.999318	0.999416	0.985619	0.996914	0.992846	1	0.963305	0.995095	0.944445	0.998611	0.990268	0.99904	0.918	1
PMAX.NC_047019.1	0.991145	0.814412	1	0.999985	0.999303	0.99684	1	1	0.0993705	1	0.675077	0.994236	1	0.141258	0.993845	0.996347	1	0.0373881	0.223106	0.00304761	0.184531	1	0.998382	1	0.876372	0.996274	0.961591	0.999349	1	1	0.959724	0.97998	0.817897	1	0.979011	0.999318	0.999416	0.985619	0.996914	0.939654	1	0.963305	0.848698	0.928848	0.183288	0.990268	0.215358	0.918	0.261279
PMAX.NC_047020.1	0.281153	0.993558	1	0.749975	0.999303	0.99684	1	0.697925	0.968102	0.0996398	0.999516	0.847426	0.699734	0.779228	0.993845	0.265328	1	0.998011	0.997652	0.999845	0.998973	1	0.998382	1	0.84314	0.996274	0.961591	0.944929	0.859118	9.28734e-06	0.176091	0.97998	0.975235	1	0.979011	0.999318	0.999416	0.985619	0.314036	0.992846	1	0.963305	0.995095	0.928848	0.998611	0.735494	0.99904	0.918	1
PMAX.NC_047021.1	0.991145	0.993558	1	0.999985	0.999303	0.99684	1	1	0.889683	0.521526	0.999516	0.918759	1	0.999455	0.738259	0.996347	1	0.998011	0.997652	0.999845	0.261174	1	0.0264599	0.314328	0.84314	0.996274	0.961591	0.999349	1	0.977652	1	0.97998	0.975235	1	0.416821	0.999318	0.999416	0.328564	0.314036	0.992846	0.436603	0.991888	0.995095	0.936703	0.183288	0.223862	0.99904	0.918	0.313034
PMAX.NC_047022.1	0.991145	0.814412	0.236817	0.999985	0.441203	0.99684	1	1	0.889683	1	0.61451	0.994236	1	0.999455	0.993845	0.738132	0.361174	0.097783	0.274737	0.999845	0.998342	1	0.998382	1	0.84314	0.996274	0.961591	0.999349	1	0.710061	1	0.97998	0.217879	0.173411	0.979011	0.0277767	0.243455	0.985619	0.996914	0.992846	1	0.991888	0.995095	0.944445	0.998611	0.990268	0.99904	0.918	1
PMAX.NC_047023.1	0.991145	0.993558	1	0.999985	0.999303	0.99684	1	1	0.968102	1	0.898579	0.994236	1	0.999455	0.993845	0.996347	0.23434	0.998011	0.997652	0.379076	0.998973	1	0.998382	1	0.876372	0.996274	0.961591	0.999349	1	1	0.959724	0.763242	0.817897	0.173411	0.416821	0.000419132	0.00241972	0.0306864	0.996914	0.939654	1	0.991888	0.995095	0.928848	0.998611	0.990268	0.99904	0.918	1
PMAX.NC_047024.1	0.12111	0.993558	0.302305	0.749975	0.334836	0.99684	1	1	0.99992	1	0.329995	0.988778	1	0.999455	0.993845	0.265328	0.576539	0.998011	0.997652	0.999845	0.606736	1	0.998382	1	0.876372	0.996274	0.961591	0.999349	1	1	0.176091	0.97998	0.975235	1	0.979011	0.999318	0.999416	0.985619	0.314036	0.357129	0.0322877	0.797862	0.547763	0.928989	0.998611	0.990268	0.99904	0.918	0.221957
PMAX.NC_047025.1	0.991145	0.814412	1	0.999985	0.441203	0.99684	1	0.486025	0.99992	1	0.777384	0.988778	1	0.306737	0.738259	0.996347	1	0.998011	0.274737	0.999845	0.998973	1	0.998382	0.000100313	0.84314	0.000936064	0.172318	0.0655935	1	0.977652	1	0.97998	0.975235	1	0.416821	0.999318	0.999416	0.985619	0.747757	0.992846	1	0.991888	0.995095	0.928848	0.210555	0.990268	0.774896	0.918	1
PMAX.NC_047026.1	0.991145	0.75456	1	0.466342	0.999303	0.99684	1	0.486025	0.99992	1	0.999516	0.994236	1	0.014118	0.993845	0.996347	1	0.687262	0.274737	0.999845	0.998973	1	0.998382	0.26314	0.983296	0.996274	0.994604	0.600209	1	0.977652	1	0.712326	0.975235	1	0.979011	0.999318	0.243455	0.985619	0.314036	0.992846	1	0.991888	0.848698	0.928848	0.998611	0.990268	0.784162	0.918	1
PMAX.NC_047027.1	0.991145	0.814412	1	0.999985	0.999303	0.99684	1	0.938637	0.99992	1	0.898579	0.847426	1	0.999455	0.993845	0.996347	1	0.998011	0.997652	0.999845	0.998973	1	0.584077	1	0.84314	0.996274	0.372242	0.658785	1	1	0.959724	0.97998	0.817897	1	0.979011	0.0415529	0.582611	0.717065	0.924884	0.992846	1	0.991888	0.995095	0.936703	0.998611	0.654278	0.99904	0.926286	1
PMAX.NC_047028.1	0.991145	0.993558	1	0.999985	0.999303	0.99684	1	1	0.99992	1	0.61451	0.988778	1	0.999455	0.993845	0.265328	1	0.0586464	0.997652	0.432521	0.998973	1	0.998382	1	0.876372	0.218451	0.961591	0.999349	1	1	0.959724	0.97998	0.817897	1	0.665772	0.874916	0.236366	0.985619	0.996914	0.35953	1	0.919651	0.883451	0.928989	0.998611	0.990268	0.99904	0.918	0.0242273
PMAX.NC_047029.1	0.991145	0.993558	1	0.843048	0.504175	0.99684	1	0.938637	0.889683	0.0996398	0.999516	0.27002	1	0.999455	0.993845	0.940005	1	0.396724	0.955098	0.999845	0.434766	1	0.998382	1	0.983296	0.996274	0.961591	0.600209	1	1	1	0.712326	0.817897	1	0.979011	0.999318	0.999416	0.985619	0.996914	0.992846	1	0.963305	0.995095	0.928848	0.998611	0.223862	0.99904	0.918	1
PMAX.NC_047030.1	0.991145	0.993558	1	0.999985	0.999303	0.99684	1	1	0.968102	1	0.999516	0.988778	1	0.999455	0.993845	0.996347	1	0.416656	0.997652	0.074725	0.998973	1	0.998382	1	0.84314	0.996274	0.961591	0.58626	1	0.710061	0.316009	0.763242	0.975235	0.571153	0.764019	0.128793	0.578541	0.328564	0.996914	0.992846	1	0.963305	0.995095	0.285146	0.0284984	0.990268	0.99904	0.973704	1
PMAX.NC_047031.1	0.991145	0.814412	1	0.953424	0.999303	0.99684	1	1	0.99992	1	0.999516	0.988778	1	0.306737	0.89847	0.996347	1	0.998011	0.274737	0.929594	0.998973	1	0.998382	1	0.84314	0.996274	0.961591	0.58626	1	1	0.959724	0.712326	0.975235	0.966669	0.979011	0.999318	0.999416	0.985619	0.747757	0.992846	1	0.963305	0.995095	0.928848	0.998611	0.990268	0.99904	0.918	1
PMAX.NC_047032.1	0.991145	0.814412	1	0.749975	0.999303	0.99684	1	0.938637	0.99992	1	0.999516	0.994236	1	0.999455	0.993845	0.996347	0.265451	0.998011	0.997652	0.7128	0.998973	1	0.998382	1	0.84314	0.996274	0.172318	0.58626	1	1	0.959724	0.97998	0.975235	0.493629	0.665772	0.999318	0.999416	0.67935	0.803362	0.992846	1	0.919651	0.995095	0.928848	0.998611	0.990268	0.0118427	0.918	0.0188838
PMAX.NC_047033.1	0.991145	0.814412	1	0.999985	0.999303	0.99684	1	1	0.889683	1	0.999516	0.918759	0.182483	0.999455	0.993845	0.996347	1	0.998011	0.955098	0.137022	0.998973	1	0.998382	1	0.859081	0.996274	0.769118	0.486454	1	1	1	0.97998	0.975235	1	0.979011	0.999318	0.999416	0.985619	0.996914	0.992846	1	0.963305	0.985241	0.928848	0.998611	0.440409	0.99904	0.918	1
SBEN.Ch_6	0.184013	0.00126414	0.513349	0.41404	0.203409	0.227391	0.830859	0.509709	0.00336581	0.642947	0.99965	0.756484	1	0.978408	0.777097	0.982215	0.853971	0.25241	1	1	0.922165	0.994714	0.973454	0.964724	0.993783	0.902147	0.998633	1	0.995249	0.913279	0.899525	0.979164	0.996406	1	0.974896	0.919223	0.951578	0.982353	0.821204	0.905796	0.929689	1	0.889721	0.999697	0.880364	0.92263	0.999524	1	0.921062
SBEN.Ch_8	1	1	0.891951	0.925824	0.354414	0.891007	0.830859	0.881302	0.0585171	0.998814	0.266215	0.756484	0.424342	0.591468	0.777097	0.885348	0.865543	0.99657	1	0.260616	0.999596	0.798985	0.971751	0.697507	0.993783	0.902147	0.967131	1	0.608182	0.913279	0.899525	0.831417	0.996406	1	0.974896	0.919223	0.951578	0.848315	0.976254	0.702581	0.929689	1	0.302158	0.169157	0.963575	0.92263	0.886604	0.975551	0.987612
SBEN.Ch_2	0.568376	1	0.891951	0.925824	0.999053	0.891007	0.932111	0.99204	0.70734	0.642947	0.925694	0.756484	1	0.978408	0.777097	0.982215	0.971779	0.99657	1	1	0.735733	0.798985	0.14522	0.402904	0.059349	0.189299	0.476217	0.268019	0.507505	0.381207	0.593822	0.645728	1	1	0.974896	0.919223	0.951578	0.633921	0.976254	0.702581	0.875177	1	0.959223	0.706365	0.963575	0.92263	0.999524	0.975551	0.987612
SBEN.Ch_9	1	1	0.891951	0.925824	0.999053	0.891007	0.932111	0.94046	0.997866	0.642947	0.925694	0.756484	1	0.880767	0.777097	0.885348	0.971779	0.99657	1	1	0.50413	0.994714	0.971751	0.402904	0.993783	0.902147	0.877978	0.562514	0.608182	0.913279	0.999698	0.610277	0.996406	0.926284	0.974896	0.919223	0.944148	0.982353	0.976254	0.702581	0.929689	1	0.959223	0.128231	0.880364	0.92263	0.326203	0.975551	0.634924
SBEN.Ch_11	1	1	0.872994	0.925824	0.251243	0.891007	0.830859	0.94046	0.997866	0.642947	0.925694	0.756484	1	0.880767	0.998117	0.982215	0.853971	0.99657	1	1	0.922165	0.994714	0.971751	0.964724	0.819861	0.902147	0.476217	1	0.995249	0.913279	0.593822	0.831417	0.0866445	0.2507	0.041301	0.25015	0.951578	0.982353	0.976254	0.905796	0.929689	0.423074	0.302158	0.999697	0.880364	0.92263	0.213812	0.975551	0.987612
SBEN.Ch_5	1	0.642475	0.872994	0.41404	0.354414	0.891007	0.932111	0.94046	0.997866	0.642947	0.575692	0.756484	1	0.978408	0.777097	0.982215	0.865543	0.677744	1	0.212811	0.434931	0.561224	0.971751	0.964724	0.993783	0.993361	0.810886	1	0.616806	0.913279	0.74997	0.979164	0.996406	0.783696	0.974896	0.919223	0.951578	0.633921	0.940346	0.905796	0.929689	0.423074	0.889721	0.999697	0.880364	0.861892	0.999524	0.975551	0.59019
SBEN.Ch_4	0.628847	0.762982	0.891951	0.925824	0.638791	0.891007	0.932111	0.94046	0.997866	0.642947	0.925694	0.756484	1	0.852171	0.887662	0.199502	0.853971	0.0560093	0.249488	1	0.735733	0.994714	0.971751	0.964724	0.819861	0.902147	0.810886	1	0.507505	0.913279	0.820203	0.831417	1	0.267567	0.974896	0.919223	0.944148	0.982353	0.821204	0.702581	0.929689	1	0.959223	0.128231	0.963575	0.861892	0.999524	0.975551	0.987612
SBEN.Ch_3	0.628847	1	0.891951	0.925824	0.999053	0.227391	0.830859	0.971869	0.997866	0.642947	0.925694	0.756484	1	0.830353	0.777097	0.885348	0.853971	0.99657	1	1	0.922165	0.994714	0.971751	0.964724	0.819861	0.902147	0.810886	1	0.995249	0.913279	0.999698	0.979164	1	1	0.31323	0.919223	0.218083	0.633921	0.132986	0.702581	0.929689	1	0.889721	0.999697	0.963575	0.861892	0.886604	0.975551	0.634924
SBEN.Ch_7	0.509343	1	0.872994	0.925824	0.999053	0.891007	0.932111	0.94046	0.997866	0.998814	0.925694	0.756484	0.646299	0.978408	0.998117	0.982215	0.853971	0.99657	0.324144	0.212811	0.735733	0.798985	0.971751	0.964724	0.0904597	0.938734	0.810886	0.562514	0.995249	0.913279	0.74997	0.831417	1	1	0.974896	0.919223	0.951578	0.982353	0.942947	0.905796	0.0174154	0.423074	0.302158	0.128231	0.963575	0.42351	0.999524	1	0.987612
SBEN.Ch_10	1	1	0.872994	0.925824	0.789244	0.891007	0.861616	0.94046	0.00507257	0.998814	0.925694	0.756484	1	0.591468	0.777097	0.982215	0.865543	0.99657	1	1	0.735733	0.798985	0.674198	0.964724	0.993783	0.902147	0.810886	1	0.995249	0.913279	0.899525	0.979164	0.996406	1	0.974896	0.919223	0.951578	0.633921	0.821204	0.905796	0.929689	0.821765	0.959223	0.960346	0.880364	0.42351	0.0613483	0.975551	0.987612
SBEN.Ch_1	1	1	0.872994	0.925824	0.396794	0.891007	0.861616	0.99204	0.997866	0.642947	0.925694	0.756484	1	0.880767	0.777097	0.885348	0.853971	0.561222	1	0.314612	0.735733	0.994714	0.971751	0.964724	0.993783	0.902147	0.881182	0.562514	0.608182	0.913279	0.999698	0.979164	1	0.390023	0.974896	0.919223	0.218083	0.982353	0.940346	0.702581	0.929689	1	0.959223	0.706365	0.963575	0.861892	0.326203	1	0.0190834
SNUD.CM049306.1	0.236967	0.584298	0.963205	0.796976	0.945661	0.997868	0.846094	0.966675	0.405746	0.97452	0.82165	0.840796	0.724134	1	1	0.922786	0.999398	0.292539	0.991706	1	0.0851814	1	0.882976	0.988884	0.994699	0.492506	0.989094	0.0969917	0.991955	0.999731	1	0.998196	0.99942	0.600823	0.935042	1	1	0.69968	1	0.252242	1	0.97901	0.971283	0.989194	1	0.98385	0.994052	1	1
SNUD.CM049307.1	0.998278	0.884085	0.999995	0.998823	0.945661	0.997868	0.785799	0.120786	0.00350923	0.00631542	2.51264e-05	0.6961	0.316661	0.164181	0.0393526	0.547585	0.999398	1	0.991706	1	0.99945	1	0.882976	0.177102	0.994699	1	0.989094	1	0.991955	0.999731	1	0.998196	0.99942	0.173146	0.964147	0.978233	0.734715	1	1	1	1	0.97901	0.902794	0.999739	1	0.98385	0.994052	1	0.781727
SNUD.CM049308.1	0.998278	0.680916	0.978208	0.802947	0.945661	0.997868	0.999523	0.120786	0.179574	0.97452	0.00571431	0.984847	0.724134	1	1	0.922786	0.00672913	0.00283127	0.00217168	0.105255	0.99945	1	0.882976	0.988884	0.994699	0.492506	0.989094	0.999986	0.16932	0.999731	1	0.349402	0.99942	0.999665	0.935042	1	1	1	1	0.623528	1	0.97901	0.971283	0.989194	0.301875	0.98385	0.994052	1	0.538337
SNUD.CM049309.1	0.998278	0.884085	0.0521284	0.21213	0.0687114	0.000626163	0.31961	0.966675	0.257353	0.97452	0.999978	0.984847	1	1	0.444664	0.922786	0.162355	1	0.991706	1	0.00732824	0.39627	0.933848	0.988884	0.994699	0.00866799	0.188375	0.999986	0.991955	0.999731	1	0.998196	0.99942	0.999665	0.964147	1	1	1	1	1	1	0.97901	0.916369	0.989194	1	0.98385	0.994052	1	1
SNUD.CM049310.1	0.236967	0.884085	0.963205	0.998823	0.945661	0.997868	0.999523	0.966675	0.999769	0.97452	0.999978	0.836279	1	0.460553	1	0.922786	0.999398	1	0.991706	1	0.000747978	0.159885	0.882976	0.791009	0.994699	1	0.989094	1	0.403616	0.514925	0.397586	0.187918	0.0349424	0.999665	0.964147	1	1	1	0.43304	0.592556	1	0.97901	0.902794	0.989194	1	0.98385	0.0690451	1	0.393154
SNUD.CM049311.1	0.236967	0.995546	0.999995	0.998823	0.945661	0.997868	0.999523	0.966675	0.999769	0.97452	0.999978	0.6961	1	0.72468	1	0.922786	0.999398	0.29105	0.755896	1	0.0851814	1	0.933848	0.0733287	0.00142435	1	0.989094	0.890783	0.991955	0.29275	1	0.998196	0.99942	0.999665	0.964147	0.612368	1	1	0.43304	0.0915519	1	0.850946	0.902794	0.241159	1	0.98385	0.0690451	1	0.393154
SNUD.CM049312.1	0.998278	0.995546	0.999995	0.998823	0.945661	0.997868	0.846094	0.966675	0.999769	0.97452	0.999978	0.6961	0.902205	0.254756	1	0.922786	0.999398	1	0.755896	1	0.99945	0.680038	0.891934	0.113641	0.259155	1	0.973329	0.900956	0.991955	0.0221152	0.287836	0.998196	0.161691	0.595101	0.935042	0.978233	1	0.574466	1	1	1	0.193507	0.945813	0.999739	1	0.98385	0.994052	1	1
SNUD.CM049313.1	0.998278	0.995546	0.963205	0.535243	0.794889	0.847725	0.498147	0.966675	0.999769	0.97452	0.999978	0.836279	0.724134	0.627775	1	0.922786	0.927372	1	0.845429	1	0.99945	0.680038	0.882976	0.988884	0.994699	1	0.989094	1	0.991955	0.999731	0.287836	0.00605415	0.0106707	0.0278798	0.935042	0.978233	0.296381	1	1	1	1	0.97901	0.902794	0.989399	1	0.98385	0.393657	1	0.393154
SNUD.CM049314.1	0.998278	0.995546	0.978208	0.998823	0.945661	0.997868	0.846094	0.966675	0.999769	0.97452	0.999978	0.6961	0.902205	1	1	0.922786	0.936538	1	0.991706	1	0.99945	1	0.882976	0.791009	0.994699	1	0.418348	1	0.991955	0.0696946	1	0.998196	0.99942	0.173146	0.440379	1	0.734715	1	1	0.0338351	0.670847	0.0787648	0.916369	0.989194	1	0.98385	0.535336	1	0.893902
SNUD.CM049315.1	0.998278	0.884085	0.963205	0.998823	0.945661	0.408449	0.846094	0.966675	0.179574	0.660168	0.339116	0.836279	0.724134	1	1	0.922786	0.999398	1	0.755896	1	0.795383	1	0.882976	0.988884	0.994699	1	0.693721	1	0.260209	0.999731	1	0.998196	0.99942	0.999665	0.964147	0.978233	1	2.37694e-06	0.121029	1	1	0.97901	0.971283	0.989194	0.301875	0.1122	0.994052	1	1
SNUD.CM049316.1	0.852677	0.884085	0.1398	0.998823	0.402388	0.997868	0.968874	0.748635	0.999769	0.97452	0.999978	0.836279	1	1	1	0.922786	0.999398	1	0.991706	1	0.763402	1	0.882976	0.988884	0.920579	0.00866799	6.99379e-05	0.011414	0.16932	0.999731	1	0.998196	0.99942	0.999665	0.964147	1	1	1	1	1	1	0.97901	0.486997	0.989194	1	0.98385	0.994052	1	1
SNUD.CM049317.1	0.998278	0.884085	0.963205	0.998823	0.945661	0.679206	0.569821	0.966675	0.999769	0.867677	0.999978	0.6961	1	0.254756	0.444664	0.922786	0.999398	1	0.991706	1	0.99945	0.885239	0.882976	0.988884	0.994699	1	0.989094	1	0.991955	0.999731	0.951002	0.998196	0.99942	0.825915	0.964147	1	1	1	0.43304	1	1	0.939771	0.902794	0.241159	0.00205398	0.0530029	0.222996	1	1
SNUD.CM049318.1	0.998278	0.995546	0.963205	0.998823	0.945661	0.847725	0.498147	0.966675	0.999769	0.660168	0.999978	0.858245	1	1	0.928101	0.922786	0.0617067	0.159007	0.755896	1	0.99945	1	0.882976	0.988884	0.994699	1	0.989094	0.999986	0.991955	0.197055	0.951002	0.733516	0.99942	0.740396	0.935042	0.978233	1	1	1	1	1	0.939771	0.902794	0.989194	1	0.98385	0.994052	1	1
SNUD.CM049319.1	0.998278	0.884085	0.999995	0.998823	0.945661	0.305884	0.999523	0.966675	0.968076	0.826063	0.999978	0.836279	0.471068	0.254756	0.444664	0.922786	0.486965	0.697419	0.991706	0.769956	0.99945	0.680038	0.933848	0.988884	0.994699	1	0.989094	1	0.991955	0.999731	1	0.998196	0.99942	0.999665	0.102979	0.0501178	0.128865	1	0.190556	0.414583	1	0.97901	0.902794	0.989194	1	0.98385	0.994052	1	0.414583
SNUD.CM049320.1	0.998278	0.995546	0.963205	0.535243	0.945661	0.997868	0.397758	0.966675	0.999769	0.97452	0.999978	0.984847	1	1	1	0.922786	0.999398	1	0.991706	1	0.99945	0.680038	0.882976	0.988884	0.994699	1	0.989094	1	0.991955	0.0366321	0.287836	0.625577	0.0673631	0.740396	0.964147	1	1	1	0.750023	1	1	0.97901	0.486997	0.0790798	1	0.98385	0.222996	1	1
SNUD.CM049321.1	0.998278	0.884085	0.167008	0.998823	0.945661	0.34198	0.846094	0.966675	0.999769	0.52593	0.999978	0.984847	1	1	1	0.922786	0.999398	1	0.755896	1	0.99945	1	0.882976	0.988884	0.994699	1	0.989094	1	0.991955	0.999731	1	0.625577	0.324553	0.999665	0.487742	0.978233	1	1	1	0.5061	1	0.97901	0.971283	0.989399	0.53255	0.98385	0.0331484	1	1
SNUD.CM049322.1	0.998278	0.884085	0.963205	0.998823	0.945661	0.997868	0.397758	0.966675	0.999769	0.97452	0.999978	0.6961	1	1	1	0.922786	0.936538	1	0.991706	1	0.99945	0.680038	0.971204	0.791009	0.259155	1	0.989094	0.999986	0.991955	0.999731	1	0.998196	0.161691	0.528642	0.167423	1	1	1	1	1	1	0.193507	0.902794	0.989399	1	0.0921566	0.994052	1	1
WPIG.Chr1	0.999999	0.999864	0.944364	0.131763	1	1	1	1	4.82561e-35	5.08702e-12	2.93165e-07	1	1	1	2.80875e-09	1	0.999999	1.6772e-09	0.999748	0.186067	1	1	1	3.95813e-05	1	0.999997	1	1	1	1	1	1	1	1	1	0.611289	0.298896	4.02347e-07	1	1	0.999722	1	1	6.2134e-10	1	1.27592e-65	1	1	1
WPIG.Chr2	0.999999	0.999864	1.40769e-40	0.999461	0.674341	0.901962	1	1	0.999901	2.7063e-08	1	1	0.0118759	1	0.999998	1	1.64461e-08	1.71411e-08	0.999748	1.1151e-32	1	1	5.6158e-14	1	1	0.999997	1	0.00373118	1	1	1	1	1	1	1	1	1	2.00586e-30	1	1	0.999722	1	1	0.999958	1	1	2.77437e-12	1	1
WPIG.Chr3	0.999999	0.999864	1	0.999461	1	1	1	1	0.999901	1	1	1	1	1	0.999998	1	0.999999	0.999985	0.140235	1	1	2.97699e-36	1	1	1	0.999997	3.57037e-30	1	3.37546e-07	1	0.604214	1	1	4.56914e-10	1	1.54245e-19	6.64558e-14	1	1	3.82326e-29	0.999722	1	1	8.53241e-22	1	1	1	1	1
WPIG.Chr4	0.999999	1.88826e-18	1	0.999461	1.47753e-22	1	0.00630505	1	0.999901	1	2.81164e-23	1	1	1	0.999998	1	0.999999	0.999985	2.12632e-25	0.0177769	1	6.84887e-18	7.5916e-13	1	1	0.999997	1	3.8867e-05	1	1	2.54109e-57	1	1	2.7105e-23	1	1	1	1	1	1	0.999722	1	1	0.999958	1	1	0.00114998	1	1
WPIG.Chr5	0.999999	0.999864	0.00348576	0.999461	1	2.02189e-14	1	2.47079e-07	0.999901	1	1	1	1	1	0.999998	1	0.999999	0.628608	0.999748	1	1	1	1	1	1	0.999997	3.2918e-07	1	1.05145e-11	1	1	4.47724e-70	5.59593e-07	1	1	1	1.38641e-07	1	1	0.555302	0.999722	1.12633e-05	1.27446e-17	0.999958	1	1	1	7.31469e-09	1
WPIG.Chr6	0.999999	0.999864	1	0.000114859	1	1	1	1	0.999901	1	1	1	1	1	0.999998	1	0.999999	0.999985	0.999748	1	1	1	1	1	1.31443e-81	0.999997	1	1	1	1	1	1	1	1	1	3.76986e-45	1	1	1	1	3.59707e-38	3.4057e-19	1	0.999958	2.17226e-51	1	1	1	1
WPIG.Chr7	0.999999	0.999864	0.944364	2.89141e-08	4.90582e-11	1	1	1.13711e-07	0.999901	1	2.28811e-16	1	2.9746e-08	1	0.999998	1	5.51518e-55	0.999985	0.999748	1	1	1	1	1	1	0.999997	1	1	1	1	1	1	1.18582e-73	1	1	1	1	4.72238e-07	1	1	0.999722	1	1	0.999958	1	1	1	0.00121151	1
WPIG.Chr8	0.428668	0.999864	1	0.999461	1	1.26374e-28	1	1	0.0267801	8.75082e-26	1	1	1	1	0.999998	1	0.999999	0.999985	0.999748	1	2.39241e-100	1	1	1.27669e-26	1	0.999997	1	1	1	1	1	1	1	1	1	1	1	1	1	1	0.999722	3.69514e-07	1.60651e-12	0.999958	0.372958	1	1	1	1
WPIG.Chr9	0.999999	1.72096e-08	1	0.999461	1	1	6.11459e-06	1	0.999901	1	1	4.38075e-41	1	1.78902e-77	1.50465e-33	1	0.999999	0.000226682	0.999748	0.00190628	1	1	1	1.35608e-05	1	0.999997	2.08121e-05	1	1	1	1	1	1	1	1	1	1	1	1	1	0.999722	1	1	0.999958	1	1	1	1	1
WPIG.Chr10	0.999999	0.999864	1	0.999461	1	1	9.42152e-13	1	0.999901	1	1	1	1	1	0.999998	3.36711e-05	0.999999	0.999985	0.999748	1	1	1	1	1	1	3.09848e-41	1	1	1	2.07539e-30	1	1	1	1	1	1	1.18227e-17	1	1	1.24499e-09	0.999722	1	1	0.999958	1	1	1	1	6.02869e-68
WPIG.Chr11	6.78512e-46	0.999864	1	0.999461	1	1	2.85401e-20	1	0.999901	1	1	1	1	1	0.999998	2.85909e-17	0.999999	0.999985	0.999748	1	0.00103988	1	1	1	1	2.89774e-12	1	1	1	1.78838e-27	1	1	1	1	1.53479e-40	1	1	1	9.67885e-34	1	0.999722	1	1	0.999958	1	1	1	1	1
[truncated: 2 more columns]

## Sheet: LeechLGs
	HMAN_HNIP_WPIG_6	HMAN_HNIP_WPIG_4	HMAN_HNIP_WPIG_12	HMAN_HNIP_WPIG_7	HMAN_HNIP_WPIG_16	HMAN_HNIP_WPIG_15	HMAN_HNIP_WPIG_9	HMAN_HNIP_WPIG_3	HMAN_HNIP_WPIG_14	HMAN_HNIP_WPIG_8	HMAN_HNIP_WPIG_1	HMAN_HNIP_WPIG_13	HMAN_HNIP_WPIG_5	HMAN_HNIP_WPIG_2	HMAN_HNIP_WPIG_10	HMAN_HNIP_WPIG_11
CMAT.chr_1	3.89366e-42	1.91732e-06	0.0701258	1	0.999976	1	1	1	1	1	1	1	1	2.54362e-13	1	5.43064e-08
CMAT.chr_2	1	7.67113e-18	7.20197e-23	1	0.999976	1	1	1.67615e-13	1	1	0.920354	1	1	1	1	2.69672e-18
CMAT.chr_3	6.98262e-06	0.000134296	0.0552556	1	0.00205903	1	1	1	3.56299e-09	1.12906e-31	1	1	4.18508e-06	1	1	1
CMAT.chr_4	1	3.40808e-46	1	2.35406e-08	0.999976	1	6.64432e-20	1	1	1	1	1	0.00826964	1	1	1
CMAT.chr_5	1	1	1	1	3.84061e-09	1	1	1	4.03566e-22	0.000256226	2.25717e-09	1.39576e-22	1	1	2.8091e-28	1
CMAT.chr_6	3.36382e-05	1	1	1.15696e-05	0.999976	1	1	0.000497103	1	1	1	1.20471e-17	3.60944e-19	1	0.00813505	1
CMAT.chr_7	1	1	1	1	0.999976	1	1	0.00494326	1	0.000930255	1.16046e-28	1	1	1	1	2.73498e-12
CMAT.chr_8	1	1	1	1.78141e-17	0.999976	1	5.89288e-40	1	1	0.196	1	1	1	0.00411657	1	1
CMAT.chr_9	1	1	2.03691e-35	1	0.0833561	1.48403e-05	1	1	0.00019896	1	1.44559e-22	1	1	1	1	1
CMAT.chr_10	1	0.000134296	1	1	0.999976	1	1	7.39463e-49	1	1	1	1	1	1.93253e-42	1	1
CMAT.chr_11	1	1	1	0.00385669	0.999976	1	8.89163e-05	1	1	1	1	1	1	2.75063e-118	1	1
CMAT.chr_12	1	1	1	2.1095e-05	6.12457e-05	1	2.39608e-11	1	0.000170659	1	7.4323e-19	1	1	1	1	1
CMAT.chr_13	1	1	1	0.0198848	0.999976	1	1	1	1	1	1	1	1.04243e-23	1	1	7.73807e-29
CMAT.chr_14	8.29056e-11	1	1	1	0.999976	8.87071e-25	0.0285253	1	1	0.0374275	1.56586e-23	1	1	1	1	1
CMAT.chr_15	1	1	1	1	0.999976	1.82738e-48	1	6.40455e-06	1	2.48168e-28	1	1	1	1	1	1
CMAT.chr_16	1	1	1	2.87108e-26	0.999976	1	6.71886e-11	1	1	1	1	1	1	1	3.13861e-52	1
CMAT.chr_17	1	1	1	1	0.999976	1	1	0.000497103	1	1	1	1.57852e-38	1.69341e-35	1	1	1
EAND.GWHACBE00000001	7.66135e-05	0.635981	1	0.472177	1.6513e-05	1	1	1	3.16561e-56	0.999999	0.0377771	1	1.25354e-05	1	8.82564e-17	1
EAND.GWHACBE00000002	1	1	0.391505	1	0.827734	1	0.000355048	1	1	7.82071e-08	8.9557e-35	5.16292e-08	1	8.02464e-10	0.210649	1.60558e-06
EAND.GWHACBE00000003	8.85706e-18	1	1	0.0153299	1	1.64763e-21	1	1	6.74011e-29	4.26298e-06	0.0377771	0.198829	1	1	0.210649	0.00272178
EAND.GWHACBE00000004	1.80056e-19	2.91774e-17	3.13286e-09	1	1	3.17228e-07	1	1	1	4.95043e-12	0.231149	1	1	2.09935e-39	1	0.00104616
EAND.GWHACBE00000005	1	1	1	0.0290004	1	1.39933e-05	1	1	1	0.999999	1	1	8.98778e-12	1.51787e-32	1	1
EAND.GWHACBE00000006	1	1	8.9053e-39	0.472177	1	5.63754e-10	0.132468	2.03331e-76	1	0.999999	1	1	1	1	1	1
EAND.GWHACBE00000007	1	1	1	3.54171e-13	1	1	1	1	1	0.999999	1	1.73722e-13	1.24553e-26	0.110995	1.18329e-24	1
EAND.GWHACBE00000008	1	2.93434e-49	1	1	2.06892e-07	1	0.132468	1.49281e-23	1	0.999999	1	1	3.29732e-24	1	1	1
EAND.GWHACBE00000009	1	1	1	1	4.07366e-09	1	1.43708e-26	1	0.978699	0.999999	1	4.33057e-45	1	1	1	1
EAND.GWHACBE00000010	1	1	1	1	3.27812e-20	0.212688	4.28384e-46	9.07189e-05	1	0.999999	1	1	1	1	1	1
EAND.GWHACBE00000011	1	0.635981	1	8.66936e-49	1	1	1	3.13214e-45	1	0.999999	1	9.91357e-05	1	1	1	1
ECRY.scf7180000024016.6106231	4.04753e-05	0.000243787	1	1	1	1	1	1	1	1	1	1	1	1	0.406452	0.944281
ECRY.scf7180000024043.1468058	8.88802e-06	1	1	1	1	1	1	1	1	1	0.747797	1	1	1	0.406452	1
ECRY.scf7180000023970.4582792	1	1	1	1	1	1	0.552798	1	1	1	1	0.000386404	1	0.762755	1	1
ECRY.scf7180000024048.3904504	1	1	1	1	1	1	1	0.0860253	0.0321238	0.232391	1	1	1	1	1	1
ECRY.scf7180000023901.4321316	1	0.467345	1	1	0.292167	1	1	1	1	1	1	1	0.0369803	0.132993	1	1
ECRY.scf7180000024041.5477867	1	1	1	1	1	1	1	0.0983356	1	0.000280004	1	1	0.480694	1	1	1
ECRY.scf7180000023961.622029	1	1	1	0.945198	1	1	0.000394459	1	1	0.900533	1	0.00957762	1	1	1	1
ECRY.scf7180000023746.4027801	1	1	0.139129	1	1	1	0.103174	1	1	1	1	0.00657643	1	1	1	1
ECRY.scf7180000023433.77741	1	1	1	0.0516497	1	1.14335e-18	1	1	1	1	1	1	1	1	1	1
ECRY.scf7180000023648.3685046	1	0.380854	1	1	0.000301902	1	1	1	1	1	1	1	1	1	1	1
ECRY.scf7180000023637.2435755	1	1	1	1	1	1	1	0.00320428	0.0590277	1	1	1	1	1	1	0.944281
ECRY.scf7180000024040.1232157	1	1	1	0.811184	1	1	1	1	1	1	0.042815	0.67725	0.685291	1	1	1
ECRY.scf7180000023952.3473064	1	1	1	0.0799122	1	0.00313831	1	1	1	1	1	0.195948	1	1	1	1
ECRY.scf7180000023630.3359036	1	1	1	1	0.0791778	1	0.00789973	1	1	1	1	1	0.0249092	1	1	1
ECRY.scf7180000023750.3372389	1	1	1	1	0.348872	1	0.0156245	1	1	1	1	1	0.178012	1	1	1
ECRY.scf7180000023670.2275729	0.00127951	1	1	1	1	1	0.552798	1	1	1	0.0486116	1	1	1	1	0.944281
ECRY.scf7180000023724.3213358	1	1	1	1	1	1	0.552798	1	1	1	1	0.00657643	0.415568	1	1	1
ECRY.scf7180000024022.3207392	0.263016	1	1	1	1	1	1	2.69864e-08	1	1	1	1	1	1	1	1
ECRY.scf7180000023771.2162011	1	1	0.553879	0.811184	1	1	1	1	1	1	0.452638	1	1	1	1	1
ECRY.scf7180000023809.1888596	1	1	2.26277e-05	2.94263e-06	1	1	0.51857	1	1	1	1	0.67725	1	1	1	1
ECRY.scf7180000023730.3122031	0.263016	1	1	1	1	1	1	1	1	1	0.0545484	1	1	0.525447	1	1
ECRY.scf7180000023751.1365616	1	1	1	1	0.77934	1	1	1	1	1	1	1	0.974977	1	0.868223	1
ECRY.scf7180000023949.2978466	1	1	1	1	1	1	0.112249	0.0156251	1	1	1	1	1	1	1	1
ECRY.scf7180000023782.2982715	1	1	2.26277e-05	1	1	0.00132531	1	1	1	1	1	1	1	1	1	1
ECRY.scf7180000023690.3279956	1	1	1	1	1	1	1	1	1	0.977085	0.750913	1	0.54676	1	1	1
ECRY.scf7180000023727.1057424	1	1	0.00546209	0.945229	1	1	1	1	1	1	1	0.00657643	1	1	1	1
ECRY.scf7180000023262.31072	1	0.609492	1	1	1	1	0.0014695	1	1	1	1	1	1	1	1	1
ECRY.scf7180000023623.336459	8.88802e-06	1	1	1	1	1	1	1	1	1	0.036001	1	1	1	1	1
ECRY.scf7180000023742.962986	1	1	1	0.000245606	1	1	1	1	1	1	0.127266	1	1	0.0540247	1	1
ECRY.scf7180000023623.5591261	0.091087	1	1	1	1	1	1	1	1	0.0179584	1	1	1	1	1	1
ECRY.scf7180000023624.2659075	1	0.380854	1	1	1	1	1	0.0589526	1	1	1	1	1	1	1	0.944281
ECRY.scf7180000023622.564893	1	0.00275062	1	1	0.0470196	1	1	1	1	1	1	1	0.54676	1	1	1
ECRY.scf7180000023654.243390	1	1	1	1	0.292167	1	0.552798	1	0.00326893	1	1	1	0.0619663	1	1	1
ECRY.scf7180000023738.2603014	1	1	1	1	0.12836	1	1	0.897992	0.81183	1	1	1	1	1	1	1
ECRY.scf7180000023647.1063006	1	1	1	1	1	1	1	1	1	1	1	1	0.0249092	0.132993	1	1
ECRY.scf7180000023987.2172811	1	1	0.553879	0.176494	1	1	1	1	1	1	0.455349	1	1	0.525447	1	1
ECRY.scf7180000023764.2523689	1	1	1	1	0.552525	1	0.971466	1	1	1	1	0.195948	0.279663	1	1	1
ECRY.scf7180000023661.2563741	1	1	1	1	1	1	1	0.0161699	1	0.0104743	1	1	0.678003	1	1	1
ECRY.scf7180000024005.2551396	0.0932771	1	1	0.811184	1	1	1	1	1	1	0.0406769	1	1	1	1	0.944281
ECRY.scf7180000023965.3892078	1	1	1	1	1	1	1	1	0.0590277	1	1	1	0.739147	1	1	1
ECRY.scf7180000023704.2061584	1	1	1	0.945229	1	1	1	0.0279055	1	0.163199	0.63014	1	1	1	1	1
ECRY.scf7180000023747.1915408	1	1	1	0.811184	1	0.975495	0.784679	1	1	1	1	1	0.480694	0.525447	1	1
ECRY.scf7180000023768.2185744	1	1	0.0142964	0.945229	1	1	1	1	1	1	1	0.197503	0.290455	1	1	1
ECRY.scf7180000023650.2413482	1	1	1	0.175812	1	0.00132531	1	1	1	1	1	1	1	1	1	1
ECRY.scf7180000023669.2531915	1	1	1	1	1	1	1	1	0.000213384	1	1	1	0.0249092	1	1	1
ECRY.scf7180000023745.1975086	1	1	1	1	1	1	0.552798	1	0.823965	1	1	1	1	1	1	1
ECRY.scf7180000023792.1757689	1	1	1	1	1	1	0.950363	1	1	0.977085	1	0.67725	0.480694	1	1	1
ECRY.scf7180000024023.2323017	1	1	0.954511	1	1	1	1	1	1	0.605733	1	1	1	1	0.642485	1
ECRY.scf7180000023977.581247	1	1	1	0.945229	1	1	0.950363	1	1	1	0.213845	1	1	1	1	1
ECRY.scf7180000023657.2288772	1	1	1	1	1	1	0.552798	1.68123e-10	1	1	1	1	1	1	1	1
ECRY.scf7180000023626.2277328	1	1	1	1	1	1	1	5.93532e-13	1	1	1	1	1	1	1	1
ECRY.scf7180000023432.307514	1	1	0.00600874	1	1	1	1	1	1	1	1	1	1	1	1	0.944281
ECRY.scf7180000024042.1575494	0.10065	1	1	1	0.866504	1	1	1	0.514614	1	0.898951	1	1	1	1	0.944281
ECRY.scf7180000023641.2187235	1	1	1	0.568145	1	1	0.950363	1	1	1	5.77751e-05	1	1	0.525447	1	1
ECRY.scf7180000023697.2107495	1	1	1	1	1	1	0.493925	1	1	1	1	0.565478	0.0343387	1	1	1
ECRY.scf7180000023649.769389	1	1	1	1	1	1	1	1	1	4.69864e-06	1	1	1	1	1	1
ECRY.scf7180000023725.3537867	1	0.609492	1	1	1	1	1	1	1	0.0184635	1	1	0.178012	1	1	1
ECRY.scf7180000023265.169033	1	1	1	1	1	1	1	1	1	1	1	0.0362854	1	1	1	1
HMAN.Chr2	1	1	1	0	0	1	1	1	1	1	1	1	1	1	1	1
HMAN.Chr1	1	0	1	1	1	1	1	1	1	1	1	1	1	1	1	1
HMAN.Chr3	1	1	0	1	1	1	1	1	1	1	1	1	1	1	1	1
HMAN.Chr4	0	1	1	1	1	1	1	1	1	1	1	1	1	1	1	1
HMAN.Chr5	1	1	1	1	1	0	1	1	1	1	1	1	1	1	1	1
HMAN.Chr6	1	1	1	1	1	1	0	1	1	1	1	1	1	1	1	1
HMAN.Chr7	1	1	1	1	1	1	1	1	6.59098e-162	0	1	1	1	1	1	1
HMAN.Chr8	1	1	1	1	1	1	1	1	1	1	0	1	1	1	1	1
HMAN.Chr9	1	1	1	1	1	1	1	1	1	1	1	0	1	1	1	1
HMAN.Chr10	1	1	1	1	1	1	1	1	1	1	1	1	1	1	0	1
HMAN.Chr11	1	1	1	1	1	1	1	0	1	1	1	1	1	1	1	1
HMAN.Chr12	1	1	1	1	1	1	1	1	1	1	1	1	0	0	1	1
HMAN.Chr13	1	1	1	1	1	1	1	1	1	1	1	1	1	1	1	0
HNIP.Chr1	0	0	1	1	1	1	1	1	1	1	1	1	1	1	1	1
HNIP.Chr2	1	1	1	1	1	1	1	0	1.92471e-142	0	1	1	1	1	1	1
HNIP.Chr3	1	1	1	1	1	0	0	1	1	1	1	1	1	1	1	1
HNIP.Chr4	1	1	0	1	1	1	1	1	1	1	1	1	1	1	1	1
HNIP.Chr5	1	1	1	0	1	1	1	1	1	1	1	1	1	1	1	1
HNIP.Chr6	1	1	1	1	0	1	1	1	1	1	1	1	1	1	1	1
HNIP.Chr7	1	1	1	1	1	1	1	1	1	1	0	1	1	1	1	1
HNIP.Chr8	1	1	1	1	1	1	1	1	1	1	1	1	1	0	1	1
HNIP.Chr9	1	1	1	1	1	1	1	1	1	1	1	1.14423508738494e-316	0	1	1	1
HNIP.Chr10	1	1	1	1	1	1	1	1	1	1	1	1	1	1	0	1
HNIP.Chr11	1	1	1	1	1	1	1	1	1	1	1	1	1	1	1	0
LLON.1	0.973327	0.00372336	0.998108	0.986477	0.99901	0.995298	0.432858	0.948153	0.960017	0.825678	0.999996	0.904203	0.447362	0.15937	0.597644	0.900365
LLON.2	0.973327	0.989857	0.998108	0.866035	0.99901	0.764113	0.983639	0.760238	0.917783	0.825678	0.232104	0.138106	0.893414	0.982865	0.999117	0.731118
LLON.3	0.0194001	0.299091	0.998108	0.998478	0.973831	0.886048	0.0411675	0.948153	0.917783	0.825678	0.999996	0.976337	0.975329	0.982865	0.665119	0.99275
LLON.4	0.973327	0.661663	0.159251	0.998478	0.973831	0.995298	0.983639	0.948153	0.917783	0.825678	0.00612858	0.976337	0.927343	0.982865	0.597644	0.99275
LLON.5	0.342973	0.989857	0.850514	0.00384119	0.144746	0.198679	0.432858	0.948153	0.994439	0.825678	0.999996	0.976337	0.927343	0.982865	0.999117	0.670336
LLON.6	0.973327	0.989857	0.159251	0.618127	0.144746	0.792904	0.983639	0.948153	0.917783	0.842169	0.892692	0.976337	0.927343	0.692383	0.999117	0.99275
LLON.7	0.973327	0.989857	0.998108	0.998478	0.225947	0.0282539	0.983639	0.948153	0.917783	0.825678	0.999996	0.976337	0.208811	0.982865	0.597644	0.99275
LLON.8	0.973327	0.299091	0.998108	0.998478	0.973831	0.995298	0.0411675	0.760238	0.994439	0.825678	0.999996	0.708305	0.927343	0.0913479	0.999117	0.670336
LLON.9	0.973327	0.989857	0.998108	0.998478	0.973831	0.995298	0.983639	0.760238	0.917783	0.825678	0.351307	0.976337	0.927343	0.692383	0.042992	0.99275
LLON.10	0.973327	0.989857	0.630553	0.998478	0.99901	0.764113	0.983639	0.762441	0.917783	0.825678	0.373074	0.682914	0.893414	0.982865	0.755948	0.731118
LLON.11	0.973327	0.989857	0.998108	0.998478	0.124042	0.995298	0.983639	0.948153	0.917783	0.825678	0.117666	0.976337	0.893414	0.982865	0.999117	0.99275
LLON.12	0.973327	0.989857	0.630553	0.00384119	0.99901	0.457697	0.983639	0.948153	0.917783	0.825678	0.00207099	0.976337	0.927343	0.982865	0.999117	0.99275
LLON.13	0.973327	0.339944	0.850514	0.998478	0.99901	0.995298	0.983639	0.948153	0.961859	0.825678	0.999996	0.976337	0.1748	0.0128803	0.999117	0.731118
LLON.14	0.973327	0.989857	0.337335	0.998478	0.99901	0.995298	0.983639	0.948153	0.917783	0.825678	0.999996	0.976337	0.893414	0.982865	0.042992	0.99275
LLON.16	0.973327	0.989857	0.998108	0.998478	0.297541	0.54594	0.983639	0.948153	0.961859	0.825678	0.999996	0.138106	0.927343	0.982865	0.999117	0.99275
LLON.17	0.973327	0.989857	0.998108	0.396809	0.973831	0.860334	0.983639	0.948153	0.917783	0.825678	0.999996	0.904203	0.927343	0.982865	0.999117	0.99275
LLON.15	0.973327	0.989857	0.998108	0.618127	0.99901	0.886048	0.983639	0.948153	0.961859	0.825678	0.892692	0.549004	0.893414	0.982865	0.0299905	0.731118
LLON.18	0.973327	0.989857	0.850514	0.998478	0.99901	0.934408	0.983639	0.948153	0.917783	0.825678	0.373074	0.976337	0.893414	0.692383	0.999117	0.338731
LLON.19	0.973327	0.339944	0.159251	0.998478	0.973831	0.995298	0.983639	0.948153	0.917783	0.883459	0.999996	0.976337	0.927343	0.692383	0.999117	0.670336
MVUL.MV001	1	0.871048	1	1	1	3.00629e-23	1	1	1	1	1	0.014085	1	0.99999	0.244335	5.66857e-18
MVUL.MV002	1	1	8.20761e-09	8.81128e-10	0.710051	1	1	1	1	1	1	0.00101357	1	0.99999	1	6.09466e-10
MVUL.MV003	1	1	1	3.86838e-16	1.55001e-09	1	1	1	1	1	1	1	1	0.99999	1	5.27584e-13
MVUL.MV004	8.03777e-05	0.871048	1	1	1.97437e-07	6.41644e-16	1	3.83064e-06	0.128913	1	1	1	1	0.99999	1	1
MVUL.MV005	1	1	1	1	1	4.78738e-48	1	0.0593817	1	1	1	1	1	0.99999	1	1
MVUL.MV006	1	0.492284	1	1	1	1	1	0.0133594	1	2.09474e-22	1	1	1	0.99999	2.5779e-09	1
MVUL.MV007	1	1	1	1	1	1	2.75822e-24	1	1	0.374349	1.30066e-09	1	1	0.99999	6.90483e-07	8.25e-06
MVUL.MV008	1	1	1	1	1	1	1.21839e-06	1	1	1	1	1	8.97107e-16	0.99999	8.60546e-13	1
MVUL.MV009	1	1	1	1.12194e-05	1	1	4.46894e-35	1	1	1	8.65939e-23	1	1	0.99999	1	1
MVUL.MV010	1	1	4.38118e-09	3.10248e-05	1	1	0.0326305	1	1	1	1	4.35803e-13	1	0.0326434	1	1
MVUL.MV011	1	0.000149564	1	1	1	1	1	1.38611e-07	1	7.06119e-29	1	1	1	0.99999	1.65783e-09	1
MVUL.MV012	1	1	1	2.37706e-07	1	0.000130302	1	1	6.39232e-21	1	0.000644388	1	1	0.99999	1	1
MVUL.MV013	0.20571	7.79181e-05	1	1	1.47138e-08	2.4678e-26	1	0.0125103	0.380583	1	1	1	1	0.99999	1	1
MVUL.MV014	1	1	1	1	1	1	3.51056e-09	1	1	1	1	0.884631	9.09545e-10	0.99999	5.12908e-06	1
MVUL.MV015	1	1	1	1.2337e-07	1	1	4.76477e-27	1	1	1	4.69902e-20	1	1	0.99999	1	1
MVUL.MV016	1	1	1	9.10701e-05	1	0.000143287	1	1	1.62539e-25	1	0.000671611	1	1	0.99999	1	1
MVUL.MV017	1	1	1.57497e-08	8.09538e-09	1	1	0.00043028	1	1	1	1	2.17003e-10	1	0.12786	1	1
MVUL.MV018	1	1	1	1	1	1	1	1	1	1	1	1	9.7943e-14	9.16617e-30	1	1
MVUL.MV019	1	1	1	1	1	1	2.95824e-06	1	1	1	0.00370832	1	1	0.99999	8.55781e-06	3.73427e-05
MVUL.MV020	1	0.000244731	1	1	1	1	1	1.01787e-13	1	1.40968e-16	1	1	1	1.90313e-09	1	1
MVUL.MV021	1	1	1	1	8.76326e-35	1	1	1	1	0.00066456	1	1	1	0.99999	1	1
MVUL.MV022	1	1	1	1	1.71888e-32	1	1	1	1.36199e-12	1	1	1	1	0.0341353	1	1
MVUL.MV023	1	1	1	1	1	1	1	1	0.849282	1	1	1	9.7943e-14	2.75895e-36	1	1
MVUL.MV024	1	4.49227e-07	1	1	1	1	1	3.27872e-15	1	1.40384e-12	1	1	1	8.92451e-08	1	1
MVUL.MV025	1	1	1	1	1	1	1	1	1	1	1	2.61459e-41	1	0.99999	0.0177785	1.77711e-08
MVUL.MV026	1	1	1	9.45455e-12	1	0.0922349	1	1	1	1	6.59281e-07	1	0.000466102	0.99999	1	1
MVUL.MV027	1	1	1	1	8.81407e-29	1	1	1	2.20807e-16	1	1	1	0.820411	0.484072	1	1
MVUL.MV028	2.33524e-09	1	1	1	1	9.23117e-22	1	1	1	0.768403	1	1	1	0.99999	1.15628e-06	1
MVUL.MV029	1	1	1	2.03582e-07	1	1	1	1	1	1	1.94708e-13	1	0.00222794	0.99999	1	1
MVUL.MV030	1	1	1	0.101646	1	1	0.000179671	1	1.18434e-20	1	1	0.00439855	1	0.99999	1	1
MVUL.MV031	1	1	1.83123e-16	1	7.12869e-05	1	0.270245	1	1	1	1	0.695948	1	1.03905e-12	1	1
MVUL.MV032	0.282261	1	1	1	1.20949e-30	1	1	1	1	0.374349	1	1	1	0.99999	0.00232892	1
MVUL.MV033	2.89324e-33	1	1	1	0.156697	1	1	1	1	1.1839e-09	1	0.15105	1	0.99999	1	1
MVUL.MV034	1	1	1.94349e-38	1	1	1	1	1	1	1	1	6.36545e-08	0.000699842	0.99999	1	1
MVUL.MV035	5.52058e-25	1	1	1	1	1	1	1	1	3.20134e-13	1	0.0207482	1	0.99999	1	1
MVUL.MV036	2.54504e-16	1	1	1	1	4.26093e-13	1	1	1	0.0145371	1	1	1	0.99999	6.10797e-07	1
MVUL.MV037	1	1	1	0.00183416	1	1	0.85299	1	2.20807e-16	1	1	4.20862e-08	1	0.56267	1	1
MVUL.MV038	1	1	1	1	1	1	1	1	1	1	4.18118e-18	1	5.00392e-26	0.99999	1	1
MVUL.MV039	1	1	0.0179472	1	8.43616e-08	1	0.0370571	1	1	1	1	0.553555	1	1.91216e-11	1	1
MVUL.MV040	1	1	1	1	1	1	1	1	1	1	6.6669e-23	1	2.17699e-19	0.99999	1	1
MVUL.MV041	1	1	1	1	1	0.0389913	1	1	1	1	1	1	0.0166056	0.99999	0.0139394	3.18843e-30
NNAJ.chr_1	1.37589e-09	0.0273726	0.999999	1	0.0450515	6.6946e-12	1	1	1	1	0.241999	1	1	2.35367e-44	8.99304e-14	1
NNAJ.chr_2	1	1	0.999999	0.000232084	0.00462293	1	1	1	1	1	1	1	1.78687e-34	1	6.45154e-15	1
NNAJ.chr_3	1	1	1.85724e-05	1.75736e-38	1	1	6.72505e-05	0.0034059	1	1	2.92231e-10	1	1	0.00505005	1	0.000235739
NNAJ.chr_4	1	1	0.999999	1	2.83119e-12	1	2.45005e-13	3.22137e-28	1	1	1	1	0.373031	1	1.46444e-20	1
NNAJ.chr_5	1	1	0.999999	1	1	3.98222e-07	2.5535e-49	1	1	8.7644e-27	1	1	1	0.0388361	1	1
NNAJ.chr_6	5.27588e-26	1.04098e-26	9.95784e-25	2.99041e-05	1	1	1	1	1	1	1	1	7.5178e-13	1	1	1.63162e-08
NNAJ.chr_7	1	1	6.61642e-06	1	1	1	1	4.06178e-27	9.51707e-08	1	1	1	2.18977e-23	1	1	0.0212046
NNAJ.chr_8	1	1	0.999999	0.547247	1	1.19779e-20	1	1	1	5.07285e-43	1	0.00177879	1	1	1	1
NNAJ.chr_9	1	1	0.999999	1	8.50271e-56	1	1.9779e-05	1	1	1	1	5.74578e-35	1	1	1	1
NNAJ.chr_10	0.174021	0.0282503	0.999999	1	1	1	1	1	1	1	1	2.18964e-47	1	0.875165	8.924e-22	1
NNAJ.chr_11	1	1	0.999999	0.0148558	1	1	1	1	1.10019e-21	0.0493577	2.41024e-10	1	7.43326e-25	1	1	1
NNAJ.chr_12	1	1	1.35645e-06	1	1	3.98222e-07	1	1	1	1.42557e-10	1	1	1.89735e-18	1	1	0.000470976
NNAJ.chr_13	1	1	0.999999	1	1	1	1.40776e-32	2.30542e-10	1	1	4.06703e-94	1	1	1	1	1
NNAJ.chr_14	1	1	0.999999	1	1	0.00123495	1	1	1	3.08378e-06	1	1.14416e-121	1	1	1	1
NNAJ.chr_15	1	1	0.999999	1.00092e-27	2.02375e-07	1	1	1	1.90981e-56	1	1	1	1	0.875165	1	1
NNAJ.chr_16	2.1015e-40	1	0.999999	1	3.1743e-06	1	1	1	1	1	1	1	1	5.74715e-31	1	1
NNAJ.chr_17	1	3.65409e-61	0.999999	1	1	7.68684e-21	1	1	1	3.02731e-10	1	1	1	1	1	1
OFUS.CAIIXF020000001.1	0.0968891	0.994401	0.966318	0.999911	0.99904	0.901796	0.579232	0.366774	0.805395	0.79558	0.115958	0.77327	0.886268	0.89475	0.991159	0.797929
OFUS.CAIIXF020000005.1	0.451335	0.000546359	0.894039	0.0651958	0.99904	0.901796	0.942814	0.986156	0.362474	0.861798	0.999483	0.77327	0.999518	0.744069	0.991159	0.999887
OFUS.CAIIXF020000006.1	0.998297	0.858739	0.894039	0.999911	0.422846	0.901796	0.0116525	0.366774	0.996748	0.978363	0.999483	0.77327	0.502935	0.744069	0.642314	0.797929
OFUS.CAIIXF020000007.1	0.998297	0.994401	0.894039	0.84199	0.99904	0.901796	0.991799	0.986156	0.0288241	0.861798	0.999483	0.77327	0.886268	0.744069	0.00505871	0.797929
OFUS.CAIIXF020000008.1	0.998297	0.938139	0.894039	0.999911	0.0666483	0.000299081	0.991799	0.986156	0.805395	0.926827	0.878481	0.994045	0.844341	0.89475	0.991159	0.797929
OFUS.CAIIXF020000009.1	0.998297	0.994401	0.894039	0.999911	0.364242	0.901796	0.233224	0.000101575	0.362474	0.79558	0.999483	0.77327	0.491509	0.744069	0.991159	0.797929
OFUS.CAIIXF020000010.1	0.998297	0.994401	0.894039	0.213225	0.99904	0.901796	0.991799	0.986156	0.996748	0.79558	0.0285798	0.77327	0.502935	0.89475	0.278632	0.797929
OFUS.CAIIXF020000011.1	0.472314	0.0094202	0.984497	0.233668	0.361813	0.63543	0.991799	0.986156	0.996748	0.861798	0.999483	0.448558	0.491509	0.89475	0.991159	0.797929
OFUS.CAIIXF020000012.1	0.998297	0.994401	0.894039	0.999911	0.99904	0.901796	0.991799	0.986156	0.996748	0.861798	0.878481	0.77327	0.844341	0.744069	0.00500051	0.0144773
OFUS.CAIIXF020000002.1	0.998297	0.994401	0.894039	0.999911	0.57001	0.901796	0.991799	0.366774	0.362474	0.79558	0.325477	0.77327	0.491509	0.954155	0.991159	0.797929
OFUS.CAIIXF020000003.1	0.498983	0.153101	0.894039	0.84199	0.361813	0.901796	0.991799	0.986156	0.996748	0.79558	0.0939981	0.849169	0.999518	0.89475	0.991159	0.900037
OFUS.CAIIXF020000004.1	0.549702	0.994401	0.894039	0.213225	0.99904	0.901796	0.991799	0.986156	0.996748	0.861798	0.175775	0.77327	0.502935	0.744069	0.412571	0.797929
PECH.Superscaffold1	0.995915	0.500162	0.999902	0.926652	0.991188	0.771856	0.999407	0.977158	0.99836	0.615717	0.504458	0.0955899	0.999963	0.78665	0.0452495	0.989739
PECH.Superscaffold2	0.995915	0.22911	0.424963	0.926652	0.939998	0.920401	0.999407	0.830778	0.99836	0.504433	0.984401	0.998449	0.0837551	0.78665	0.988682	0.989739
PECH.Superscaffold5	0.446375	0.999978	0.513319	0.187297	0.000179074	0.617173	0.0043992	0.830778	0.914673	0.992517	0.984401	0.99998	0.999963	0.976111	0.988682	0.989739
PECH.Superscaffold3	0.995915	0.999978	0.999902	0.536312	0.939998	0.617173	0.999407	0.830778	0.914673	0.992517	0.984401	0.645612	0.323635	0.78665	0.988682	0.130971
PECH.Superscaffold4	0.974705	0.999978	0.999902	0.980089	0.991188	0.617173	0.999407	0.986208	0.593348	0.992517	0.217597	0.759989	0.0202651	0.971783	0.988682	0.989739
PECH.Superscaffold7	0.0148862	7.07802e-06	0.999902	0.972666	0.991188	0.617173	0.999407	0.986208	0.99836	0.615717	0.984401	0.998449	0.77409	0.78665	0.988682	0.989739
PECH.Superscaffold6	0.490175	0.999978	0.513319	0.980089	0.939998	0.737769	0.323157	0.830778	0.99836	0.992517	0.984401	0.998449	0.999963	0.971783	0.734703	0.226495
PECH.Superscaffold8	0.995915	0.999978	0.523545	0.980089	0.939998	0.990511	0.323157	0.699277	0.0354875	0.992517	0.181265	0.998449	0.999963	0.976111	0.734703	0.989739
PECH.Superscaffold10	0.974705	0.22911	0.999902	0.980089	0.991188	0.771856	0.999407	0.883926	0.99836	0.504433	0.984401	0.645612	0.323635	0.662611	0.734703	0.989739
PECH.Superscaffold9	0.995915	0.22911	0.999902	0.980089	0.991188	0.990511	0.999407	0.699277	0.99836	0.504433	0.984401	0.998449	0.999963	0.647192	0.00796329	0.108694
PECH.Superscaffold11	0.490175	0.999978	0.999902	0.926652	0.952294	0.990511	0.999407	0.830778	0.914673	0.504433	0.984401	0.186805	0.999963	0.976111	0.734703	0.324532
PECH.Superscaffold12	0.490175	0.999978	0.999902	0.980089	0.991188	0.990511	0.0944266	0.830778	0.593348	0.992517	0.112057	0.0955899	0.13145	0.78665	0.988682	0.989739
PECH.Superscaffold14	0.995915	0.680822	0.999902	0.926652	0.991188	0.771856	0.999407	0.830778	0.99836	0.992517	0.819074	0.998449	0.0318437	0.78665	0.734703	0.918441
PECH.Superscaffold13	0.995915	0.999978	0.424963	0.980089	0.939998	0.617173	0.999407	0.830778	0.914673	0.615717	0.892362	0.998449	0.999963	0.78665	0.988682	0.989739
PMAX.NC_047015.1	0.0883819	0.000165335	1	0.91547	0.98522	0.554149	0.999414	0.994598	0.860714	0.300206	0.999955	0.689421	0.999999	0.996514	0.609922	0.926237
PMAX.NC_047016.1	0.154956	0.996255	1	0.55236	0.98522	0.561955	0.999414	0.994598	0.963025	0.999961	0.330951	0.84295	0.999999	0.119692	0.998965	0.926237
PMAX.NC_047017.1	0.997703	0.329612	0.0307769	0.988328	0.894729	0.925737	0.999414	0.926045	0.860714	0.109929	0.999955	0.999992	0.928801	0.996514	0.863953	0.926237
PMAX.NC_047018.1	0.997703	0.996255	0.740661	0.887532	0.98522	0.925737	0.999414	0.994598	0.860714	0.999961	0.148365	0.999992	0.0724317	0.996514	0.412797	0.926237
PMAX.NC_047019.1	0.997703	0.996255	0.44711	0.97118	0.243124	0.925737	0.652632	0.926045	0.860714	0.109929	0.075132	0.689421	0.999999	0.255324	0.998965	0.95235
PMAX.NC_047020.1	0.417196	0.996255	0.740661	0.988328	0.98522	0.925737	0.999414	0.994598	0.860714	0.999961	0.850949	0.689421	0.548961	0.996514	0.274524	0.926237
PMAX.NC_047021.1	0.694148	0.996255	1	0.91547	0.243124	0.554149	0.0198045	0.994598	0.998741	0.999961	0.999955	0.689421	0.445293	0.996514	0.886839	0.926237
PMAX.NC_047022.1	0.997703	0.996255	1	0.55236	0.98522	0.925737	0.793514	0.115907	0.067596	0.999961	0.859199	0.689421	0.445293	0.996514	0.998965	0.926237
PMAX.NC_047023.1	0.997703	0.996255	1	0.988328	0.98522	0.925737	0.317411	0.115907	0.92377	0.999961	0.999955	0.689421	0.136776	0.353877	0.886839	0.918297
PMAX.NC_047024.1	0.0883819	0.329612	1	0.988328	0.69048	0.925737	0.999414	0.699739	0.860714	0.0606377	0.999955	0.54884	0.999999	0.996514	0.886839	0.997962
PMAX.NC_047025.1	0.997703	0.996255	1	0.988328	0.52379	0.925737	0.999414	0.994598	0.92377	0.999961	0.53624	0.999992	0.0724317	0.77782	0.886839	0.926237
PMAX.NC_047026.1	0.997703	0.996255	0.742107	0.988328	0.243124	0.925737	0.317411	0.994598	0.963025	0.999961	0.075132	0.999992	0.999999	0.556225	0.886839	0.95235
PMAX.NC_047027.1	0.997703	0.996255	1	0.91547	0.98522	0.925737	0.301129	0.994598	0.963025	0.999961	0.859199	0.610905	0.094899	0.996514	0.886839	0.926237
PMAX.NC_047028.1	0.997703	0.996255	1	0.988328	0.98522	0.925737	0.906649	0.554352	0.860714	0.999961	0.53624	0.290283	0.321367	0.996514	0.886839	0.95235
PMAX.NC_047029.1	0.997703	0.996255	1	0.785946	0.98522	0.925737	0.999414	0.699739	0.860714	0.215522	0.999955	0.999992	0.999999	0.996514	0.886839	0.926237
PMAX.NC_047030.1	0.997703	0.996255	1	0.988328	0.98522	0.925737	0.317411	0.85003	0.963025	0.999961	0.859199	0.963686	0.0724317	0.000718834	0.886839	0.926237
PMAX.NC_047031.1	0.997703	0.996255	1	0.91547	0.98522	0.925737	0.906649	0.994598	0.860714	0.999961	0.53624	0.999992	0.999999	0.996514	0.0440346	0.549159
PMAX.NC_047032.1	0.997703	0.521848	1	0.97118	0.917013	0.925737	0.999414	0.994598	0.860714	0.999961	0.53624	0.54884	0.999999	0.996514	0.886839	0.926237
PMAX.NC_047033.1	0.997703	0.996255	1	0.97118	0.98522	0.925737	0.906649	0.699739	0.860714	0.999961	0.999955	0.74731	0.445293	0.157624	0.863953	0.95235
SBEN.Ch_6	0.999179	0.903929	0.908761	0.988399	0.969153	0.968166	0.400734	0.993538	0.225473	0.924586	0.882166	0.147706	0.824344	0.828484	0.914206	0.68256
SBEN.Ch_8	0.0911173	0.894321	0.862374	0.933551	0.798928	0.968166	0.898559	0.97887	0.992528	0.924586	0.882166	0.983768	0.915564	0.977847	0.756739	0.68256
SBEN.Ch_2	0.935324	0.903929	0.492657	0.032656	0.798928	0.968166	0.898559	0.329503	0.992528	0.924586	0.882166	0.926533	0.995575	0.977847	0.914206	0.68256
SBEN.Ch_9	0.999179	0.903929	0.939406	0.725811	0.259319	0.223301	0.898559	0.993538	0.859364	0.299286	0.882166	0.926533	0.915564	0.974855	0.914206	0.68256
SBEN.Ch_11	0.999179	0.903929	0.939406	0.453786	0.96302	0.968166	0.400734	0.178617	0.531157	0.924586	0.930051	0.983768	0.616274	0.768829	0.756739	0.998766
SBEN.Ch_5	0.169816	0.903929	0.492657	0.453786	0.837144	0.968166	0.898559	0.256465	0.992528	0.924586	0.973643	0.926533	0.995575	0.768829	0.914206	0.998766
SBEN.Ch_4	0.963058	0.894321	0.939406	0.988399	0.96302	0.968166	0.898559	0.329503	0.470938	0.924586	0.930051	0.926533	0.616274	0.87552	0.756739	0.998766
SBEN.Ch_3	0.999179	0.903929	0.976554	0.988399	0.96302	0.968166	0.898559	0.993538	0.225473	0.299286	0.581506	0.0627421	0.616274	0.87552	0.914206	0.998766
SBEN.Ch_7	0.963058	0.894321	0.939406	0.933551	0.837144	0.979565	0.437162	0.993538	0.992528	0.924586	0.905196	0.926533	0.616274	0.595012	0.756739	0.998766
SBEN.Ch_10	0.206195	0.903929	0.862374	0.988399	0.837144	0.707479	0.898559	0.993538	0.992528	0.924586	0.930051	0.926533	0.767894	0.96775	0.756739	0.00457423
SBEN.Ch_1	0.963058	0.903929	0.862374	0.933551	0.944267	0.979565	0.898559	0.329503	0.859364	0.924586	0.882166	0.926533	0.973929	0.96775	0.914206	0.68256
SNUD.CM049306.1	0.00812429	0.417261	0.229832	0.988216	0.991995	0.911071	0.951911	0.0600766	0.754861	0.981285	0.993116	0.999679	0.976337	0.932261	0.987379	0.998162
SNUD.CM049307.1	0.999339	0.999951	0.999796	0.988216	0.0223224	0.095725	0.70073	0.999441	0.754861	0.981285	0.066688	0.88234	0.976337	0.103289	0.767806	0.998162
SNUD.CM049308.1	0.999339	0.999951	0.999796	0.000537887	0.281076	0.996473	0.989742	0.660809	0.627007	0.981285	0.0395076	0.870568	0.976337	0.932261	0.871636	0.998162
SNUD.CM049309.1	0.999339	0.0184678	0.0242942	0.988216	0.778658	0.911071	0.951911	0.999441	0.268508	0.981285	0.993116	0.870568	0.976337	0.932261	0.987379	0.861006
SNUD.CM049310.1	0.811496	0.999951	0.229832	0.988216	0.991995	0.911071	0.70073	0.999441	0.999888	0.788891	0.993116	0.88234	0.404408	0.932261	0.767806	0.751667
SNUD.CM049311.1	0.402778	0.999951	0.268225	0.81807	0.991995	0.996473	0.366678	0.0119847	0.999888	0.981285	0.207726	0.870568	0.404408	0.932261	0.514104	0.998162
SNUD.CM049312.1	0.761318	0.195244	0.99172	0.988216	0.991995	0.996473	0.70073	0.999441	0.999888	0.368079	0.993116	0.16627	0.976337	0.932261	0.767806	0.767419
SNUD.CM049313.1	0.0505366	0.195244	0.999796	0.988216	0.991995	0.996473	0.989742	0.999441	0.999888	0.23295	0.993116	0.870568	0.976337	0.932261	0.767806	0.767419
SNUD.CM049314.1	0.811496	0.370112	0.99172	0.988216	0.991995	0.996473	0.869839	0.999441	0.874794	0.23295	0.993116	0.129211	0.899541	0.932261	0.767806	0.998162
SNUD.CM049315.1	0.999339	0.602818	0.406341	0.870653	0.991995	0.744608	0.989742	0.666723	0.0842224	0.981285	0.993116	0.88234	0.976337	0.932261	0.767806	0.767419
SNUD.CM049316.1	0.999339	0.0184678	0.99172	0.988216	0.991995	0.911071	0.70073	0.459934	0.874794	0.981285	0.993116	0.914101	0.976337	0.932261	0.987379	0.998162
SNUD.CM049317.1	0.999339	0.999951	0.896478	0.988216	0.928428	0.184746	0.989742	0.999441	0.874794	0.981285	0.993116	0.88234	0.404408	0.103289	0.767806	0.998162
SNUD.CM049318.1	0.811496	0.999951	0.99172	0.988216	0.991995	0.911071	0.70073	0.999441	0.874794	0.23295	0.389807	0.870568	0.976337	0.93949	0.987379	0.998162
SNUD.CM049319.1	0.999339	0.999951	0.999796	0.988216	0.126822	0.39273	0.989742	0.999441	0.999888	0.23295	0.0260093	0.870568	0.976337	0.932261	0.719929	0.998162
SNUD.CM049320.1	0.0505366	0.0496606	0.896478	0.988216	0.991995	0.996473	0.989742	0.999441	0.999888	0.303604	0.993116	0.88234	0.0113901	0.932261	0.987379	0.998162
SNUD.CM049321.1	0.761318	0.999951	0.99172	0.988216	0.991995	0.996473	0.70073	0.999441	0.268508	0.981285	0.716326	0.88234	0.377591	0.932261	0.396662	0.930193
SNUD.CM049322.1	0.191724	0.782395	0.99172	0.988216	0.991995	0.996473	0.70073	0.999441	0.874794	0.981285	0.993116	0.870568	0.976337	0.932261	0.987379	0.0364387
WPIG.Chr1	0	0	1	1	1	1	1	1	1	1	1	1	1	1	1	1
WPIG.Chr2	1	1	1	1	1	1	1	0	1.4992e-145	0	1	1	1	1	1	1
WPIG.Chr3	1	1	1	1	1	0	0	1	1	1	1	1	1	1	1	1
WPIG.Chr4	1	1	0	1	1	1	1	1	1	1	1	1	1	1	1	1
WPIG.Chr5	1	1	1	1	0	1	1	1	1	1	1	1	1	1	1	1
WPIG.Chr6	1	1	1	0	1	1	1	1	1	1	1	1	1	1	1	1
WPIG.Chr7	1	1	1	1	1	1	1	1	1	1	1	1.12398548762902e-309	0	1	1	1
WPIG.Chr8	1	1	1	1	1	1	1	1	1	1	0	1	1	1	1	1
WPIG.Chr9	1	1	1	1	1	1	1	1	1	1	1	1	1	0	1	1
WPIG.Chr10	1	1	1	1	1	1	1	1	1	1	1	1	1	1	0	1
WPIG.Chr11	1	1	1	1	1	1	1	1	1	1	1	1	1	1	1	0

## Sheet: ClitLGs
	ClitLG_16	ClitLG_9	ClitLG_4	ClitLG_2	ClitLG_13	ClitLG_14	ClitLG_5	ClitLG_6	ClitLG_12	ClitLG_11	ClitLG_8	ClitLG_7	ClitLG_3	ClitLG_10	ClitLG_15	ClitLG_1	ClitLG_17
CMAT.chr_1	3.89366e-42	1.91732e-06	0.0701258	1	1	1	1	1	1	1	1	1	1	1	1	8.46266e-35	5.43064e-08
CMAT.chr_2	1	7.67113e-18	7.20197e-23	1	1	1	6.0514e-05	5.45899e-09	1	1	1	9.24846e-10	1	1	1	1	2.69672e-18
CMAT.chr_3	6.98262e-06	0.000134296	0.0552556	1	1	1	1	1	1.76138e-57	1	1	1	1	4.18508e-06	1	1	1
CMAT.chr_4	1	3.40808e-46	1	1	2.35406e-08	6.64432e-20	1	1	1	1	1	1	1	0.00826964	1	1	1
CMAT.chr_5	1	1	1	1	1	1	1	1	1.34087e-41	1	5.00579e-21	1	1.39576e-22	1	2.8091e-28	1	1
CMAT.chr_6	3.36382e-05	1	1	1	1.15696e-05	1	1.48264e-23	1	1	1	1	1	1.20471e-17	3.60944e-19	0.00813505	1	1
CMAT.chr_7	1	1	1	1	1	1	7.65265e-17	1	0.0227494	1	1	6.29801e-67	1	1	1	1	2.73498e-12
CMAT.chr_8	1	1	1	3.18758e-11	1.78141e-17	5.89288e-40	1	1	1	1	1	1	1	1	1	1	1
CMAT.chr_9	1	1	2.03691e-35	1	1	1	1	1	0.221101	1.88827e-08	5.5108e-32	1	1	1	1	1	1
CMAT.chr_10	1	0.000134296	1	1	1	1	1	8.10948e-66	1	1	1	1	1	1	1	2.35997e-61	1
CMAT.chr_11	1	1	1	6.30774e-149	0.00385669	8.89163e-05	1	1	1	1	1	1	1	1	1	0.00103079	1
CMAT.chr_12	1	1	1	1	2.1095e-05	2.39608e-11	1	1	0.0227494	1	8.17747e-15	0.000296215	1	1	1	1	1
CMAT.chr_13	1	1	1	1	0.0198848	1	0.00378957	1	1	1	1	1	1	1.04243e-23	1	1	7.73807e-29
CMAT.chr_14	8.29056e-11	1	1	1	1	0.0285253	1	1	1	3.64124e-36	3.11992e-35	1	1	1	1	1	1
CMAT.chr_15	1	1	1	0.114905	1	1	1	9.14298e-10	1	8.08588e-116	1	1	1	1	1	1	1
CMAT.chr_16	1	1	1	1	2.87108e-26	6.71886e-11	1	1	1	1	1	1	1	1	3.13861e-52	1	1
CMAT.chr_17	1	1	1	1	1	1	1	2.26067e-06	1	1	1	1	1.57852e-38	1.69341e-35	1	1	1
EAND.GWHACBE00000001	7.66135e-05	0.635981	3.62762e-24	1.6513e-05	1	1	1	1	3.16561e-56	1	1	0.0377771	1	1.25354e-05	1	1	8.82564e-17
EAND.GWHACBE00000002	1	1	1	0.827734	1	0.152196	1	0.000355048	1	1	0.0299087	8.9557e-35	5.16292e-08	1	1	1.36685e-15	0.210649
EAND.GWHACBE00000003	8.85706e-18	1	1	1	7.93848e-07	1	1	1	6.74011e-29	1	3.91539e-42	0.0377771	0.198829	1	1	1	0.210649
EAND.GWHACBE00000004	1.80056e-19	2.91774e-17	1	1	1	2.6934e-09	1	1	1	1	4.27146e-21	0.231149	1	1	1	3.08935e-69	1
EAND.GWHACBE00000005	1	1	5.11147e-16	1	1	1	1	1	1	1	0.0144036	1	1	8.98778e-12	5.88616e-68	1	1
EAND.GWHACBE00000006	1	1	1	1	0.0255928	3.75786e-82	1.21368e-120	0.132468	1	0.834658	1	1	1	1	1	1	1
EAND.GWHACBE00000007	1	1	0.000283008	1	2.6295e-09	1	1	1	1	1	1	1	1.73722e-13	1.24553e-26	1.17337e-15	1	1.18329e-24
EAND.GWHACBE00000008	1	2.93434e-49	1	2.06892e-07	1	1	1	0.132468	1	2.048e-47	1	1	1	3.29732e-24	1	1	1
EAND.GWHACBE00000009	1	1	1	4.07366e-09	1	1	1	1.43708e-26	0.978699	1	1	1	4.33057e-45	1	1	1	1
EAND.GWHACBE00000010	1	1	1	3.27812e-20	1	1	3.30556e-14	4.28384e-46	1	1	1	1	1	1	1	1	1
EAND.GWHACBE00000011	1	0.635981	1	1	1.03313e-66	1	1	1	1	1.5873e-60	1	1	9.91357e-05	1	1	1	1
ECRY.scf7180000024016.6106231	3.32272e-05	4.67035e-08	1	1	1	1	1	1	1	1	1	1	1	1	1	1	1
ECRY.scf7180000024043.1468058	7.61593e-06	0.921421	1	1	1	1	1	1	1	1	1	1	1	1	1	0.738641	1
ECRY.scf7180000023970.4582792	1	1	1	0.000286971	1	1	1	1	0.611314	0.860733	1	1	1	1	0.609129	1	1
ECRY.scf7180000024048.3904504	1	1	0.194571	0.996737	1	1	1	0.000731142	0.0916436	1	1	1	1	1	1	1	1
ECRY.scf7180000023901.4321316	1	1	1	1	1	1	1	1	1	0.161158	3.53131e-05	1	0.286946	1	1	1	1
ECRY.scf7180000024041.5477867	1	1	0.000183767	1	1	1	1	1	1	1	1	1	1	1	1	1	0.002819
ECRY.scf7180000023961.622029	1	1	0.817446	0.00811462	1	1	0.953254	1	1	1	1	1	1	1	0.000557384	1	1
ECRY.scf7180000023746.4027801	1	1	1	0.00562511	1	0.0296342	1	1	1	1	1	1	1	1	0.12449	1	1
ECRY.scf7180000023433.77741	1	1	1	1	1	1	0.0523755	1	1	1	1	1	1	3.38516e-19	1	1	1
ECRY.scf7180000023648.3685046	1	0.620056	1	0.996737	1	1	1	1	1	1	1	1	0.00028053	1	1	1	1
ECRY.scf7180000023637.2435755	1	1	1	1	1	1	1	0.00577398	6.68313e-05	1	1	1	1	1	1	1	1
ECRY.scf7180000024040.1232157	1	1	1	0.639105	1	1	0.819917	1	1	1	1	1	1	1	1	0.0415949	1
ECRY.scf7180000023952.3473064	1	1	1	0.178058	1	1	0.0810649	1	1	1	1	1	1	0.00235459	1	1	1
ECRY.scf7180000023630.3359036	1	1	1	1	1	1	1	0.931173	1	1	1	0.000198817	0.0764828	1	0.0105927	1	1
ECRY.scf7180000023750.3372389	1	1	1	1	1	1	1	1	1	1	1	0.0469323	0.343636	1	0.0196417	1	1
ECRY.scf7180000023670.2275729	0.0011344	1	1	1	1	1	1	0.931173	1	1	1	1	1	1	0.609129	0.0472718	1
ECRY.scf7180000023724.3213358	1	1	1	0.00554381	1	1	1	1	1	1	1	0.0469323	1	1	0.609129	1	0.252633
ECRY.scf7180000024022.3207392	0.252727	1	1	1	1	1	1	1	0.00183679	1	1	1	1	1	1	1	0.0018817
ECRY.scf7180000023771.2162011	1	1	1	1	1	1	0.819917	1	1	1	1	1	1	1	1	0.447014	1
ECRY.scf7180000023809.1888596	1	1	1	0.629864	1	2.95497e-05	2.87354e-06	1	1	1	1	1	1	1	0.603791	1	1
ECRY.scf7180000023730.3122031	0.252727	1	1	1	1	1	1	1	1	0.581378	1	1	1	1	1	0.0534147	1
ECRY.scf7180000023751.1365616	1	1	1	1	1	1	1	1	1	1	1	1	0.772336	1	1	1	1
ECRY.scf7180000023949.2978466	1	1	1	1	1	1	1	1	0.00183679	1	1	1	1	1	0.134972	1	1
ECRY.scf7180000023782.2982715	1	1	1	1	1	5.9743e-07	1	1	1	1	1	0.810121	1	0.00105403	1	1	1
ECRY.scf7180000023690.3279956	1	1	0.911348	1	1	1	1	1	1	1	1	1	1	1	1	0.745621	1
ECRY.scf7180000023727.1057424	1	1	1	0.00562511	4.37616e-06	1	0.953254	1	1	1	1	1	1	1	1	1	1
ECRY.scf7180000023262.31072	1	0.749534	1	1	1	1	1	1	1	1	1	1	1	1	0.00200806	1	0.63389
ECRY.scf7180000023623.336459	7.61593e-06	1	1	1	1	1	1	1	1	1	1	1	1	1	1	0.035029	1
ECRY.scf7180000023742.962986	1	1	1	1	1	1	0.000246112	1	1	0.0679029	1	1	1	1	1	0.124269	1
ECRY.scf7180000023623.5591261	0.0861386	1	0.0148279	1	1	1	1	1	1	1	1	1	1	1	1	1	1
ECRY.scf7180000023624.2659075	1	0.0754865	1	1	1	1	1	1	1	1	1	1	1	1	1	1	0.237422
ECRY.scf7180000023622.564893	1	0.0215421	1	1	1	1	1	1	1	1	0.0244088	1	0.0454148	1	1	1	1
ECRY.scf7180000023654.243390	1	1	1	1	1	1	1	0.000513971	1	1	1	0.0110757	0.286946	1	0.609129	1	1
ECRY.scf7180000023738.2603014	1	1	1	1	1	1	1	0.931173	0.0916436	1	1	1	0.12532	1	1	1	1
ECRY.scf7180000023647.1063006	1	1	1	1	1	1	1	1	1	0.161158	3.53131e-05	1	1	1	1	1	1
ECRY.scf7180000023987.2172811	1	1	1	1	0.11204	1	0.178848	1	1	0.581378	1	1	1	1	1	0.450614	1
ECRY.scf7180000023764.2523689	1	1	1	0.178058	1	1	1	1	1	1	1	0.103486	0.546074	1	1	1	1
ECRY.scf7180000023661.2563741	1	1	0.00842167	1	1	1	1	1	1	1	1	1	1	1	1	1	0.002819
ECRY.scf7180000024005.2551396	0.0866855	1	1	1	1	1	0.819917	1	1	1	1	1	1	1	1	0.0392072	1
ECRY.scf7180000023965.3892078	1	1	1	1	1	1	1	0.0115428	1	1	1	1	1	1	1	1	1
ECRY.scf7180000023704.2061584	1	1	0.141023	1	1	1	0.953254	1	1	1	1	1	1	1	1	0.624263	0.00374538
ECRY.scf7180000023747.1915408	1	1	1	1	1	1	0.819917	1	1	0.581378	1	0.432875	1	0.891332	0.844935	1	1
ECRY.scf7180000023768.2185744	1	1	1	0.181296	1	0.0112475	0.953254	1	1	1	1	0.104565	1	1	1	1	1
ECRY.scf7180000023650.2413482	1	1	1	1	1	1	0.177964	1	1	1	1	1	1	0.00105403	1	1	1
ECRY.scf7180000023669.2531915	1	1	1	1	1	1	1	0.000217846	1	1	1	0.0046079	1	1	1	1	1
ECRY.scf7180000023745.1975086	1	1	1	1	1	1	1	1	1	1	1	1	1	1	0.609129	1	1
ECRY.scf7180000023792.1757689	1	1	0.911348	0.629864	1	1	1	1	1	1	1	0.489962	1	1	1	1	1
ECRY.scf7180000024023.2323017	1	1	0.558302	1	1	1	1	1	1	1	1	1	1	1	1	1	1
ECRY.scf7180000023977.581247	1	1	1	1	1	1	0.953254	1	1	1	1	1	1	1	1	0.210711	1
ECRY.scf7180000023657.2288772	1	1	1	1	1	1	1	1	1.0618e-05	1	1	1	1	1	0.609129	1	0.00360579
ECRY.scf7180000023626.2277328	1	1	1	1	1	1	1	1	0.00387045	1	1	1	1	1	1	1	5.53833e-08
ECRY.scf7180000023432.307514	1	1	1	0.996737	0.000679879	1	1	1	1	1	1	1	1	1	1	1	1
ECRY.scf7180000024042.1575494	0.0953551	1	1	1	1	1	1	0.150478	1	1	1	1	0.859201	1	1	0.893197	1
ECRY.scf7180000023641.2187235	1	1	1	1	1	1	0.574701	1	1	0.581378	1	1	1	1	1	5.43941e-05	1
ECRY.scf7180000023697.2107495	1	1	1	0.535387	1	1	1	1	1	1	1	0.0433901	1	1	0.551159	1	1
ECRY.scf7180000023649.769389	1	1	3.16547e-06	1	1	1	1	1	1	1	1	1	1	1	1	1	1
ECRY.scf7180000023725.3537867	1	0.121731	0.01528	1	1	1	1	1	1	1	1	0.489962	1	1	1	1	1
ECRY.scf7180000023265.169033	1	1	1	0.0337579	1	1	1	1	1	1	1	1	1	1	1	1	1
HMAN.Chr2	1	1	1	1	1	1	0	0	1	1	1	1	1	1	1	1	1
HMAN.Chr1	1	1	0	0	1	1	1	1	1	1	1	1	1	1	1	1	1
HMAN.Chr3	1	1	1	1	0	1.37058e-260	1	1	1	1	1	1	1	1	1	1	1
HMAN.Chr4	0	0	1	1	1	1	1	1	1	1	1	1	1	1	1	1	1
HMAN.Chr5	1	1	1	1	1	1	1	1	0	1	1	1	1	1	1	1	1
HMAN.Chr6	1	1	1	1	1	1	1	1	1	0	1	1	1	1	1	1	1
HMAN.Chr7	1	1	1	1	1	1	1	1	1	1	1	1.97434e-106	0	1	1	1	1
HMAN.Chr8	1	1	1	1	1	1	1	1	1	1	1	1	1	0	1	1	1
HMAN.Chr9	1	1	1	1	1	1	1	1	1	1	1	1	1	1	0	1	1
HMAN.Chr10	1	1	1	1	1	1	1	1	1	1	1	1	1	1	1	0	1
HMAN.Chr11	1	1	1	1	1	1	1	1	1	1	0	1	1	1	1	1	1
HMAN.Chr12	1	1	1	1	1	1	1	1	1	1	1	2.22309e-238	6.3002e-213	1	1	1	1
HMAN.Chr13	1	1	1	1	1	1	1	1	1	1	1	1	1	1	1	1	0
HNIP.Chr1	0	0	1	1	1	1	1	1	1	1	1	1	1	1	1	1	1
HNIP.Chr2	1	1	1	1	1	1	1	1	1	1	7.63529e-286	0	1	1	1	1	1
HNIP.Chr3	1	1	1	1	1	1	1	1	0	0	1	1	1	1	1	1	1
HNIP.Chr4	1	1	0	0	1	1	1	1	1	1	1	1	1	1	1	1	1
HNIP.Chr5	1	1	1	1	0	0	1	1	1	1	1	1	1	1	1	1	1
HNIP.Chr6	1	1	1	1	1	1	9.23431e-261	0	1	1	1	1	1	1	1	1	1
HNIP.Chr7	1	1	1	1	1	1	1	1	1	1	1	1	1	0	1	1	1
HNIP.Chr8	1	1	1	1	1	1	1	1	1	1	1	1	1	1	0	1	1
HNIP.Chr9	1	1	1	1	1	1	1	1	1	1	9.33419e-244	1	0	1	1	1	1
HNIP.Chr10	1	1	1	1	1	1	1	1	1	1	1	1	1	1	1	0	1
HNIP.Chr11	1	1	1	1	1	1	1	1	1	1	1	1	1	1	1	1	0
LLON.1	0.990778	0.00372336	0.998108	0.998226	0.986477	0.997167	0.995298	0.914013	0.432858	0.999819	0.960397	0.825678	0.999893	0.904203	0.15937	0.429741	0.597644
LLON.2	0.440888	0.989857	0.998108	0.471142	0.866035	0.997167	0.764113	0.982151	0.983639	0.494716	0.960397	0.825678	0.539717	0.138106	0.982865	0.988798	0.999117
LLON.3	0.990778	0.299091	0.998108	0.998226	0.998478	0.997167	0.886048	0.759138	0.0411675	0.494716	0.960397	0.825678	0.946186	0.976337	0.982865	0.988798	0.665119
LLON.4	0.990778	0.661663	0.159251	0.000180352	0.998478	0.997167	0.995298	0.759138	0.983639	0.494716	0.960397	0.825678	0.946186	0.976337	0.982865	0.988798	0.597644
LLON.5	0.990778	0.989857	0.850514	0.998226	0.00384119	0.0447217	0.198679	0.759138	0.432858	0.955617	0.960397	0.825678	0.999893	0.976337	0.982865	0.736882	0.999117
LLON.6	0.503701	0.989857	0.159251	0.998226	0.618127	0.114097	0.792904	0.759138	0.983639	0.999819	0.960397	0.842169	0.521244	0.976337	0.692383	0.997114	0.999117
LLON.7	0.503949	0.989857	0.998108	0.998226	0.998478	0.730867	0.0282539	0.759138	0.983639	0.999819	0.960397	0.825678	0.946186	0.976337	0.982865	0.988798	0.597644
LLON.8	0.990778	0.299091	0.998108	0.998226	0.998478	0.997167	0.995298	0.759138	0.0411675	0.494716	0.960397	0.825678	0.999893	0.708305	0.0913479	0.988798	0.999117
LLON.9	0.990778	0.989857	0.998108	0.997868	0.998478	0.337644	0.995298	0.982151	0.983639	0.999819	0.148398	0.825678	0.521244	0.976337	0.692383	0.988798	0.042992
LLON.10	0.990778	0.989857	0.630553	0.944728	0.998478	0.997167	0.764113	0.982151	0.983639	0.955617	0.959607	0.825678	0.539717	0.682914	0.982865	0.887465	0.755948
LLON.11	0.990778	0.989857	0.998108	0.151247	0.998478	0.00856208	0.995298	0.759138	0.983639	0.999819	0.960397	0.825678	0.623534	0.976337	0.982865	0.988798	0.999117
LLON.12	0.835121	0.989857	0.630553	0.471142	0.00384119	0.997167	0.457697	0.989116	0.983639	0.999819	0.960397	0.825678	0.00158224	0.976337	0.982865	0.988798	0.999117
LLON.13	0.990778	0.339944	0.850514	0.998226	0.998478	0.997167	0.995298	0.982151	0.983639	0.494716	0.960397	0.825678	0.999893	0.976337	0.0128803	0.239683	0.999117
LLON.14	0.503701	0.989857	0.337335	0.998226	0.998478	0.997167	0.995298	0.982151	0.983639	0.999819	0.959607	0.825678	0.539717	0.976337	0.982865	0.988798	0.042992
LLON.16	0.990778	0.989857	0.998108	0.998226	0.998478	0.1911	0.54594	0.759138	0.983639	0.494716	0.960397	0.825678	0.623534	0.138106	0.982865	0.988798	0.999117
LLON.17	0.835121	0.989857	0.998108	0.998226	0.396809	0.997167	0.860334	0.759138	0.983639	0.999819	0.960397	0.825678	0.610156	0.904203	0.982865	0.988798	0.999117
LLON.15	0.990778	0.989857	0.998108	0.944728	0.618127	0.997167	0.886048	0.759138	0.983639	0.494716	0.960397	0.825678	0.946186	0.549004	0.982865	0.736882	0.0299905
LLON.18	0.503701	0.989857	0.850514	0.998226	0.998478	0.997167	0.934408	0.982151	0.983639	0.999819	0.960397	0.825678	0.521244	0.976337	0.692383	0.887465	0.999117
LLON.19	0.835121	0.339944	0.159251	0.998226	0.998478	0.997167	0.995298	0.759138	0.983639	0.654707	0.960397	0.883459	0.999893	0.976337	0.692383	0.887465	0.999117
MVUL.MV001	1	1	1	1	1.95486e-18	1	1	1	0.999998	5.58117e-05	1	1	4.21286e-06	1	0.99999	0.244335	5.66857e-18
MVUL.MV002	0.00337995	1	8.20761e-09	8.81128e-10	1	0.0029878	1	1	0.999998	1	1	1	0.0959852	1	0.99999	1	6.09466e-10
MVUL.MV003	0.0632824	1	1	3.86838e-16	1	1.49901e-14	1	1	0.999998	1	1	1	1	1	0.99999	1	5.27584e-13
MVUL.MV004	1	3.25641e-05	1	1	4.93032e-07	1	5.80964e-11	1	0.166141	9.43678e-09	0.128913	1	1	1	0.99999	1	1
MVUL.MV005	1	1	1	1	1.46453e-31	1	1	1	0.999998	1.24882e-12	1	1	1	1	0.99999	1	1
MVUL.MV006	0.0727423	1	1	1	1	1	1	1	1.44004e-30	1	1	1	1	1	0.99999	2.5779e-09	1
MVUL.MV007	1	1	1	1	1	1	1	2.75822e-24	0.855743	1	1	1.30066e-09	1	1	0.99999	6.90483e-07	8.25e-06
MVUL.MV008	1	1	1	1	1	1	1	1.21839e-06	0.999998	1	1	1	1	8.97107e-16	0.99999	8.60546e-13	1
MVUL.MV009	1	1	1	1.12194e-05	1	1	1	4.46894e-35	0.999998	1	1	8.65939e-23	1	1	0.99999	1	1
MVUL.MV010	6.4405e-14	1	4.38118e-09	3.10248e-05	1	1	1	0.0326305	0.999998	1	1	1	0.00390785	1	0.0326434	1	1
MVUL.MV011	0.00337995	1	1	1	1	1	1	1	1.53211e-51	1	1	1	1	1	0.99999	1.65783e-09	1
MVUL.MV012	1	1	1	2.37706e-07	1	1	1	1	0.999998	1.33139e-13	6.39232e-21	0.000644388	1	1	0.99999	1	1
MVUL.MV013	1	0.133917	1	1	1.34449e-14	1	2.55321e-17	1	0.0826797	1.65535e-10	0.380583	1	1	1	0.99999	1	1
MVUL.MV014	1	1	1	1	1	1	1	3.51056e-09	0.999998	1	1	1	0.348528	9.09545e-10	0.99999	5.12908e-06	1
MVUL.MV015	1	1	1	1.2337e-07	1	1	1	4.76477e-27	0.999998	1	1	4.69902e-20	1	1	0.99999	1	1
MVUL.MV016	1	1	1	9.10701e-05	1	1	1	1	0.999998	1.8703e-12	1.62539e-25	0.000671611	1	1	0.99999	1	1
MVUL.MV017	2.55235e-10	1	1.57497e-08	8.09538e-09	1	1	1	0.00043028	0.999998	1	1	1	0.00575078	1	0.12786	1	1
MVUL.MV018	1	1	1	1	1	1	1	1	0.999998	1	1	1	1	9.7943e-14	9.16617e-30	1	1
MVUL.MV019	1	1	1	1	1	1	1	2.95824e-06	0.999998	1	1	0.00370832	1	1	0.99999	8.55781e-06	3.73427e-05
MVUL.MV020	0.327706	1	1	1	1	1	1	1	3.72232e-44	1	1	1	1	1	1.90313e-09	1	1
MVUL.MV021	1	1	1	1	1	1	9.25344e-50	1	0.195762	1	1	1	1	1	0.99999	1	1
MVUL.MV022	1	1	1	1	1	8.30419e-48	1	1	0.999998	1	1.36199e-12	1	1	1	0.0341353	1	1
MVUL.MV023	1	1	1	1	1	1	1	1	0.999998	1	0.849282	1	1	9.7943e-14	2.75895e-36	1	1
MVUL.MV024	0.0343133	1	1	1	1	1	1	1	2.65498e-46	1	1	1	1	1	8.92451e-08	1	1
MVUL.MV025	1	1	1	1	1	1	1	1	0.999998	1	1	1	6.6969e-50	1	0.99999	0.0177785	1.77711e-08
MVUL.MV026	1	1	1	9.45455e-12	0.0372379	1	1	1	0.999998	1	1	6.59281e-07	1	0.000466102	0.99999	1	1
MVUL.MV027	1	1	1	1	1	1.80451e-45	1	1	0.999998	1	2.20807e-16	1	1	0.820411	0.484072	1	1
MVUL.MV028	1	1.71695e-12	1	1	1.72356e-24	1	1	1	0.999998	0.752492	1	1	1	1	0.99999	1.15628e-06	1
MVUL.MV029	1	1	1	2.03582e-07	1	1	1	1	0.999998	0.743619	1	1.94708e-13	1	0.00222794	0.99999	1	1
MVUL.MV030	0.0503311	1	1	0.101646	1	1	1	0.000179671	0.999998	1	1.18434e-20	1	0.0861139	1	0.99999	1	1
MVUL.MV031	1	1	1.83123e-16	1	1	1.64013e-07	1	0.270245	0.999998	1	1	1	0.111141	1	1.03905e-12	1	1
MVUL.MV032	1	0.0352072	1	1	1	1	1.2579e-46	1	0.999998	1	1	1	1	1	0.99999	0.00232892	1
MVUL.MV033	1	4.16149e-61	1	1	1	1	0.000115958	1	0.999998	1	1	1	0.00575078	1	0.99999	1	1
MVUL.MV034	1	1	1.94349e-38	1	1	1	1	1	0.999998	1	1	1	1.06701e-10	0.000699842	0.99999	1	1
MVUL.MV035	1	6.64606e-58	1	1	1	1	1	1	0.999998	1	1	1	0.00376804	1	0.99999	1	1
MVUL.MV036	1	1.03125e-26	1	1	2.27902e-17	1	1	1	0.999998	1	1	1	1	1	0.99999	6.10797e-07	1
MVUL.MV037	6.14285e-05	1	1	0.00183416	1	1	1	0.85299	0.999998	1	2.20807e-16	1	0.00111791	1	0.56267	1	1
MVUL.MV038	1	1	1	1	1	0.313508	1	1	0.999998	1	1	4.18118e-18	1	5.00392e-26	0.99999	1	1
MVUL.MV039	1	1	0.0179472	1	1	1.1514e-11	1	0.0370571	0.999998	1	1	1	0.136682	1	1.91216e-11	1	1
MVUL.MV040	1	1	1	1	1	1	1	1	0.999998	1	1	6.6669e-23	1	2.17699e-19	0.99999	1	1
MVUL.MV041	1	1	1	1	0.00535676	1	1	1	0.999998	1	1	1	1	0.0166056	0.99999	0.0139394	3.18843e-30
NNAJ.chr_1	1.37589e-09	0.0273726	1	1.15891e-29	1	1	6.6946e-12	1	1	1	1	1	0.241999	2.35367e-44	1	1	8.99304e-14
NNAJ.chr_2	1	1	0.00983718	1.6567e-17	1	1	1	1	1	5.13386e-73	1	1	1	1	1	1	6.45154e-15
NNAJ.chr_3	1	1	1.86602e-61	1	1	1	1	6.72505e-05	0.0034059	1	1	1	2.92231e-10	0.00505005	1	1	1
NNAJ.chr_4	1	1	1	1.175e-05	1.70393e-07	1	1	2.45005e-13	3.22137e-28	1.35865e-13	1	1	1	1	1	1	1.46444e-20
NNAJ.chr_5	1	1	1	1	1	1	3.98222e-07	2.5535e-49	1	1	1	8.7644e-27	1	0.0388361	1	1	1
NNAJ.chr_6	5.27588e-26	1.04098e-26	1.12566e-44	1	1	1	1	1	1	1	1	1	1	1	1	5.51105e-27	1
NNAJ.chr_7	1	1	0.0644799	1	1	1	1	1	4.06178e-27	1	8.30867e-11	1	1	1	1	2.26619e-32	1
NNAJ.chr_8	1	1	1	1	1	7.39464e-12	1.19779e-20	1	1	1	1	5.07285e-43	1	1	1	1	1
NNAJ.chr_9	1	1	1	1	5.752e-76	1	1	1.9779e-05	1	1	1	1	1	1	1.27332e-54	1	1
NNAJ.chr_10	0.174021	0.0282503	1	1	0.489465	1	1	1	1	1	1	1	1	0.875165	2.33098e-81	1	8.924e-22
NNAJ.chr_11	1	1	1	1	1	1	1	1	1	1	1.01832e-34	0.0493577	2.41024e-10	1	1	5.37906e-35	1
NNAJ.chr_12	1	1	0.00507738	1	1	1	3.98222e-07	1	1	0.00919362	1	1.42557e-10	1	1	1	6.26457e-17	1
NNAJ.chr_13	1	1	1	1	1	1	1	1.40776e-32	2.30542e-10	1	1	1	4.06703e-94	1	1	1	1
NNAJ.chr_14	1	1	1	1	1	1.32964e-157	0.00123495	1	1	1	1	3.08378e-06	1	1	0.00547011	1	1
NNAJ.chr_15	1	1	1	1	2.43935e-12	0.186378	1	1	1	1	4.63594e-126	1	1	0.875165	1	1	1
NNAJ.chr_16	2.1015e-40	1	1	1	2.78605e-09	1	1	1	1	1	1	1	1	5.74715e-31	1	1	1
NNAJ.chr_17	1	3.65409e-61	1	1	1	1	7.68684e-21	1	1	1	1	3.02731e-10	1	1	1	1	1
OFUS.CAIIXF020000001.1	0.0968891	0.0160233	0.997172	0.999911	0.99904	0.426097	0.990213	0.579232	0.366774	0.805395	0.990219	0.847036	0.77327	0.89475	0.991159	0.938566	0.994711
OFUS.CAIIXF020000005.1	0.451335	0.9994	0.000525023	0.0651958	0.99904	0.999626	0.353028	0.942814	0.986156	0.362474	0.990219	0.342474	0.77327	0.744069	0.991159	0.997048	0.994711
OFUS.CAIIXF020000006.1	0.998297	0.9994	0.997172	0.999911	0.422846	0.262174	0.353028	0.0116525	0.366774	0.996748	0.990219	0.847036	0.77327	0.744069	0.642314	0.938566	0.994711
OFUS.CAIIXF020000007.1	0.998297	0.9994	0.997172	0.84199	0.99904	0.262174	0.990213	0.991799	0.986156	0.0288241	0.990219	0.847036	0.77327	0.744069	0.00505871	0.938566	0.994711
OFUS.CAIIXF020000008.1	0.998297	0.9994	0.997172	0.999911	0.0666483	0.262174	0.909107	0.991799	0.986156	0.805395	0.792977	0.847036	0.994045	0.89475	0.991159	0.938566	0.396963
OFUS.CAIIXF020000009.1	0.998297	0.9994	0.997172	0.999911	0.364242	0.999626	0.909107	0.233224	0.000101575	0.362474	0.994643	0.969444	0.77327	0.744069	0.991159	0.370887	0.267757
OFUS.CAIIXF020000010.1	0.998297	0.275676	0.997172	0.213225	0.99904	0.460233	0.990213	0.991799	0.986156	0.996748	0.104144	0.303617	0.77327	0.89475	0.278632	0.938566	0.763817
OFUS.CAIIXF020000011.1	0.472314	0.9994	0.00506827	0.233668	0.361813	0.999626	0.647467	0.991799	0.986156	0.996748	0.990219	0.969444	0.448558	0.89475	0.991159	0.370887	0.267757
OFUS.CAIIXF020000012.1	0.998297	0.9994	0.997172	0.999911	0.99904	0.262174	0.909107	0.991799	0.986156	0.996748	0.559	0.847036	0.77327	0.744069	0.00500051	0.0739624	0.994711
OFUS.CAIIXF020000002.1	0.998297	0.9994	0.997172	0.999911	0.57001	0.999626	0.990213	0.991799	0.366774	0.362474	0.297157	0.847036	0.77327	0.954155	0.991159	0.518596	0.242648
OFUS.CAIIXF020000003.1	0.498983	0.0436286	0.00689629	0.84199	0.361813	0.999626	0.98418	0.991799	0.986156	0.996748	0.792977	0.847036	0.849169	0.89475	0.991159	0.69317	0.994711
OFUS.CAIIXF020000004.1	0.549702	0.556705	0.997172	0.213225	0.99904	0.999626	0.909107	0.991799	0.986156	0.996748	0.460825	0.847036	0.77327	0.744069	0.412571	0.895611	0.602501
PECH.Superscaffold1	0.690858	0.995915	0.891936	0.736974	0.999902	0.991188	0.771856	0.999407	0.986146	0.992636	0.0955899	0.99601	0.999963	0.943279	0.78665	0.0452495	0.553089
PECH.Superscaffold2	0.999922	0.995915	0.0516834	0.903389	0.424963	0.939998	0.920401	0.999407	0.757446	0.992636	0.998449	0.99601	0.0837551	0.669823	0.78665	0.988682	0.401891
PECH.Superscaffold5	0.999922	0.446375	0.996661	0.88995	0.513319	0.000179074	0.617173	0.0043992	0.986146	0.110775	0.99998	0.99601	0.999963	0.669823	0.976111	0.988682	0.998834
PECH.Superscaffold3	0.999922	0.995915	0.996661	0.903389	0.999902	0.939998	0.617173	0.999407	0.278361	0.0770623	0.645612	0.99601	0.323635	0.943279	0.78665	0.988682	0.998834
PECH.Superscaffold4	0.386097	0.974705	0.996661	0.736974	0.999902	0.991188	0.617173	0.999407	0.986146	0.992636	0.759989	0.176734	0.0202651	0.943279	0.971783	0.988682	0.854151
PECH.Superscaffold7	0.00085773	0.0148862	0.0307703	0.993205	0.999902	0.991188	0.617173	0.999407	0.986146	0.992636	0.998449	0.176734	0.77409	0.943279	0.78665	0.988682	0.722566
PECH.Superscaffold6	0.999922	0.490175	0.996661	0.736974	0.513319	0.939998	0.737769	0.323157	0.278361	0.873334	0.998449	0.99601	0.999963	0.943279	0.971783	0.734703	0.998834
PECH.Superscaffold8	0.999922	0.995915	0.996661	0.736974	0.523545	0.939998	0.990511	0.323157	0.697595	0.873334	0.998449	0.187493	0.999963	0.669823	0.976111	0.734703	0.998834
PECH.Superscaffold10	0.147833	0.974705	0.996661	0.736974	0.999902	0.991188	0.771856	0.999407	0.778685	0.992636	0.645612	0.99601	0.323635	0.943279	0.662611	0.734703	0.553089
PECH.Superscaffold9	0.204579	0.995915	0.891936	0.903389	0.999902	0.991188	0.990511	0.999407	0.986146	0.920809	0.998449	0.99601	0.999963	0.452423	0.647192	0.00796329	0.854151
PECH.Superscaffold11	0.999922	0.490175	0.996661	0.903389	0.999902	0.952294	0.990511	0.999407	0.278361	0.873334	0.186805	0.99601	0.999963	0.943279	0.976111	0.734703	0.262326
PECH.Superscaffold12	0.999922	0.490175	0.996661	0.736974	0.999902	0.991188	0.990511	0.0944266	0.986146	0.920809	0.0955899	0.0144782	0.13145	0.669823	0.78665	0.988682	0.998834
PECH.Superscaffold14	0.563507	0.995915	0.996661	0.736974	0.999902	0.991188	0.771856	0.999407	0.986146	0.873334	0.998449	0.99601	0.0318437	0.71753	0.78665	0.734703	0.998834
PECH.Superscaffold13	0.999922	0.995915	0.996661	0.903389	0.424963	0.939998	0.617173	0.999407	0.986146	0.920809	0.998449	0.480364	0.999963	0.669823	0.78665	0.988682	0.854151
PMAX.NC_047015.1	0.499721	0.0883819	0.000165335	0.91547	0.99908	0.957964	0.999414	0.994598	0.316662	0.999909	0.300206	0.992191	0.999955	0.999816	0.996514	0.609922	0.991186
PMAX.NC_047016.1	0.50805	0.154956	0.996255	0.55236	0.99908	0.975914	0.999414	0.994598	0.939994	0.898539	0.999961	0.992191	0.330951	0.9572	0.119692	0.998965	0.991186
PMAX.NC_047017.1	0.890766	0.997703	0.329612	0.988328	0.99908	0.957964	0.999414	0.926045	0.939994	0.421027	0.109929	0.992191	0.999955	0.985873	0.996514	0.863953	0.991186
PMAX.NC_047018.1	0.9999	0.997703	0.996255	0.887532	0.00077105	0.975914	0.999414	0.994598	0.939994	0.306468	0.999961	0.992191	0.148365	0.999816	0.996514	0.412797	0.991186
PMAX.NC_047019.1	0.625573	0.997703	0.996255	0.97118	0.99908	0.957964	0.652632	0.926045	0.939994	0.898539	0.109929	0.108384	0.075132	0.999816	0.255324	0.998965	0.991186
PMAX.NC_047020.1	0.50805	0.417196	0.996255	0.988328	0.99908	0.975914	0.999414	0.994598	0.808048	0.999909	0.999961	0.523269	0.850949	0.42054	0.996514	0.274524	0.991186
PMAX.NC_047021.1	0.50805	0.694148	0.996255	0.91547	0.526156	0.349409	0.0198045	0.994598	0.939994	0.999909	0.999961	0.992191	0.999955	0.985873	0.996514	0.886839	0.721768
PMAX.NC_047022.1	0.9999	0.997703	0.996255	0.55236	0.99908	0.975914	0.793514	0.115907	0.0781841	0.664736	0.999961	0.992191	0.859199	0.42054	0.996514	0.998965	0.991186
PMAX.NC_047023.1	0.944887	0.997703	0.996255	0.988328	0.249457	0.975914	0.317411	0.115907	0.939994	0.522086	0.999961	0.992191	0.999955	0.614115	0.353877	0.886839	0.101245
PMAX.NC_047024.1	0.976516	0.0883819	0.329612	0.988328	0.99908	0.647331	0.999414	0.699739	0.939994	0.306468	0.0606377	0.992191	0.999955	0.999816	0.996514	0.886839	0.991186
PMAX.NC_047025.1	0.9999	0.997703	0.996255	0.988328	0.203155	0.975914	0.999414	0.994598	0.939994	0.999909	0.999961	0.108384	0.53624	0.458425	0.77782	0.886839	0.991186
PMAX.NC_047026.1	0.9999	0.997703	0.996255	0.988328	0.99908	0.975914	0.317411	0.994598	0.939994	0.999909	0.999961	0.0619415	0.075132	0.59822	0.556225	0.886839	0.519699
PMAX.NC_047027.1	0.890766	0.997703	0.996255	0.91547	0.531556	0.975914	0.301129	0.994598	0.939994	0.999909	0.999961	0.992191	0.859199	0.42054	0.996514	0.886839	0.130259
PMAX.NC_047028.1	0.50805	0.997703	0.996255	0.988328	0.89368	0.975914	0.906649	0.554352	0.939994	0.79362	0.999961	0.992191	0.53624	0.42054	0.996514	0.886839	0.991186
PMAX.NC_047029.1	0.9999	0.997703	0.996255	0.785946	0.99908	0.975914	0.999414	0.699739	0.939994	0.306468	0.215522	0.463091	0.999955	0.999816	0.996514	0.886839	0.991186
PMAX.NC_047030.1	0.9999	0.997703	0.996255	0.988328	0.99908	0.975914	0.317411	0.85003	0.939994	0.898539	0.999961	0.992191	0.859199	0.00209171	0.000718834	0.886839	0.991186
PMAX.NC_047031.1	0.9999	0.997703	0.996255	0.91547	0.99908	0.975914	0.906649	0.994598	0.939994	0.421027	0.999961	0.992191	0.53624	0.999816	0.996514	0.0440346	0.0528627
PMAX.NC_047032.1	0.625573	0.997703	0.521848	0.97118	0.99908	0.957964	0.999414	0.994598	0.939994	0.306468	0.999961	0.992191	0.53624	0.999816	0.996514	0.886839	0.519699
PMAX.NC_047033.1	0.890766	0.997703	0.996255	0.97118	0.99908	0.957964	0.906649	0.699739	0.939994	0.79362	0.999961	0.992191	0.999955	0.42054	0.157624	0.863953	0.991186
SBEN.Ch_6	0.016371	0.996035	0.537912	0.908761	0.988399	0.979507	0.758237	0.969153	0.968166	0.400734	0.993538	0.225473	0.922794	0.831745	0.910322	0.828484	0.68256
SBEN.Ch_8	0.998299	0.0417678	0.537912	0.862374	0.933551	0.659285	0.758237	0.798928	0.968166	0.898559	0.97887	0.992528	0.94486	0.82518	0.889983	0.977847	0.68256
SBEN.Ch_2	0.998299	0.996035	0.998887	0.492657	0.032656	0.315301	0.758237	0.798928	0.968166	0.898559	0.329503	0.992528	0.940465	0.82518	0.889983	0.977847	0.68256
SBEN.Ch_9	0.958451	0.996035	0.968163	0.939406	0.725811	0.984105	0.845155	0.259319	0.223301	0.898559	0.993538	0.859364	0.743498	0.82518	0.889983	0.974855	0.68256
SBEN.Ch_11	0.998299	0.996035	0.537912	0.939406	0.453786	0.984105	0.994869	0.96302	0.968166	0.400734	0.178617	0.531157	0.922794	0.831745	0.910322	0.768829	0.998766
SBEN.Ch_5	0.958451	0.913222	0.998887	0.492657	0.453786	0.282383	0.758237	0.837144	0.968166	0.898559	0.256465	0.992528	0.922794	0.997874	0.910322	0.768829	0.998766
SBEN.Ch_4	0.819942	0.913222	0.338724	0.939406	0.988399	0.979507	0.758237	0.96302	0.968166	0.898559	0.329503	0.470938	0.922794	0.849247	0.910322	0.87552	0.998766
SBEN.Ch_3	0.354381	0.913222	0.537912	0.976554	0.988399	0.984105	0.758237	0.96302	0.968166	0.898559	0.993538	0.225473	0.279927	0.566851	0.30201	0.87552	0.998766
SBEN.Ch_7	0.958451	0.913222	0.537912	0.939406	0.933551	0.979507	0.758237	0.837144	0.979565	0.437162	0.993538	0.992528	0.922794	0.849247	0.889983	0.595012	0.998766
SBEN.Ch_10	0.998299	0.433804	0.968163	0.862374	0.988399	0.659285	0.758237	0.837144	0.707479	0.898559	0.993538	0.992528	0.922794	0.940196	0.889983	0.96775	0.00457423
SBEN.Ch_1	0.998299	0.913222	0.998887	0.862374	0.933551	0.979507	0.758237	0.944267	0.979565	0.898559	0.329503	0.859364	0.922794	0.849247	0.889983	0.96775	0.68256
SNUD.CM049306.1	0.00812429	0.752557	0.229832	0.991995	0.992395	0.911071	0.951911	0.113712	0.971573	0.754861	0.981285	0.993116	0.9999	0.831524	0.976337	0.394656	0.731886
SNUD.CM049307.1	0.999339	0.999439	0.999796	0.0223224	0.0762345	0.095725	0.70073	0.998776	0.742559	0.754861	0.981285	0.066688	0.9999	0.999805	0.976337	0.997336	0.731886
SNUD.CM049308.1	0.999339	0.999439	0.999796	0.281076	0.412525	0.996473	0.989742	0.420467	0.971573	0.627007	0.981285	0.0395076	0.506129	0.999805	0.976337	0.997336	0.757752
SNUD.CM049309.1	0.999339	0.000337283	0.0242942	0.778658	0.992395	0.911071	0.951911	0.998776	0.971573	0.268508	0.981285	0.993116	0.511821	0.999805	0.976337	0.997336	0.995584
SNUD.CM049310.1	0.811496	0.999439	0.229832	0.991995	0.992395	0.911071	0.70073	0.998776	0.971573	0.999888	0.788891	0.993116	0.574952	0.999805	0.404408	0.457747	0.731886
SNUD.CM049311.1	0.402778	0.999439	0.268225	0.991995	0.305979	0.996473	0.366678	0.00205055	0.878098	0.999888	0.981285	0.207726	0.836487	0.999805	0.404408	0.997336	0.731886
SNUD.CM049312.1	0.761318	0.999439	0.99172	0.991995	0.992395	0.996473	0.70073	0.998776	0.311551	0.999888	0.368079	0.993116	0.57852	0.0482833	0.976337	0.997336	0.757752
SNUD.CM049313.1	0.0505366	0.195518	0.999796	0.991995	0.992395	0.996473	0.989742	0.998776	0.971573	0.999888	0.23295	0.993116	0.441484	0.831524	0.976337	0.394656	0.995584
SNUD.CM049314.1	0.811496	0.999439	0.99172	0.991995	0.93715	0.996473	0.869839	0.955604	0.311551	0.874794	0.23295	0.993116	0.441484	0.456764	0.899541	0.997336	0.995584
SNUD.CM049315.1	0.999339	0.999439	0.406341	0.991995	0.847762	0.744608	0.989742	0.955604	0.742559	0.0842224	0.981285	0.993116	0.9999	0.601818	0.976337	0.997336	0.731886
SNUD.CM049316.1	0.999339	0.191005	0.99172	0.991995	0.992395	0.911071	0.70073	0.0109626	0.971573	0.874794	0.981285	0.993116	0.9999	0.188535	0.976337	0.997336	0.995584
SNUD.CM049317.1	0.999339	0.999439	0.896478	0.928428	0.0762345	0.184746	0.989742	0.998776	0.971573	0.874794	0.981285	0.993116	0.506129	0.999805	0.404408	0.997336	0.995584
SNUD.CM049318.1	0.811496	0.999439	0.99172	0.991995	0.992395	0.911071	0.70073	0.420467	0.878098	0.874794	0.23295	0.389807	0.506129	0.999805	0.976337	0.997336	0.995584
SNUD.CM049319.1	0.999339	0.999439	0.999796	0.126822	0.992395	0.39273	0.989742	0.998776	0.971573	0.999888	0.23295	0.0260093	0.441484	0.999805	0.976337	0.997336	0.731886
SNUD.CM049320.1	0.0505366	0.999439	0.896478	0.991995	0.992395	0.996473	0.989742	0.998776	0.971573	0.999888	0.303604	0.993116	0.80776	0.00708977	0.0113901	0.997336	0.995584
SNUD.CM049321.1	0.761318	0.999439	0.99172	0.991995	0.305979	0.996473	0.70073	0.998776	0.971573	0.268508	0.981285	0.716326	0.4925	0.999805	0.377591	0.997336	0.757752
SNUD.CM049322.1	0.191724	0.999439	0.99172	0.991995	0.992395	0.996473	0.70073	0.955604	0.650057	0.874794	0.981285	0.993116	0.9999	0.731721	0.976337	0.00560027	0.993109
WPIG.Chr1	0	0	1	1	1	1	1	1	1	1	1	1	1	1	1	1	1
WPIG.Chr2	1	1	1	1	1	1	1	1	1	1	0	7.73758e-287	1	1	1	1	1
WPIG.Chr3	1	1	1	1	1	1	1	1	0	0	1	1	1	1	1	1	1
WPIG.Chr4	1	1	0	0	1	1	1	1	1	1	1	1	1	1	1	1	1
WPIG.Chr5	1	1	1	1	1	1	0	9.68035e-261	1	1	1	1	1	1	1	1	1
WPIG.Chr6	1	1	1	1	0	0	1	1	1	1	1	1	1	1	1	1	1
WPIG.Chr7	1	1	1	1	1	1	1	1	1	1	1	1.00931e-243	0	1	1	1	1
WPIG.Chr8	1	1	1	1	1	1	1	1	1	1	1	1	1	0	1	1	1
WPIG.Chr9	1	1	1	1	1	1	1	1	1	1	1	1	1	1	0	1	1
WPIG.Chr10	1	1	1	1	1	1	1	1	1	1	1	1	1	1	1	0	1
WPIG.Chr11	1	1	1	1	1	1	1	1	1	1	1	1	1	1	1	1	0
