# Supplementary material for: A punctuated burst of massive genomic rearrangements by chromosome shattering and the origin of non-marine annelids
Source: Research Square preprint supplement (doi:10.21203/rs.3.rs-4346819/v1), 2024-05-21

**Supplementary Data 7.** CMC-Chapaev3 transposable elements in other earthworms (*Metaphire vulgaris*, MVUL, and *Carpetania matritensis*, CMAT), showing their overall overlap with centromeres (black lines).

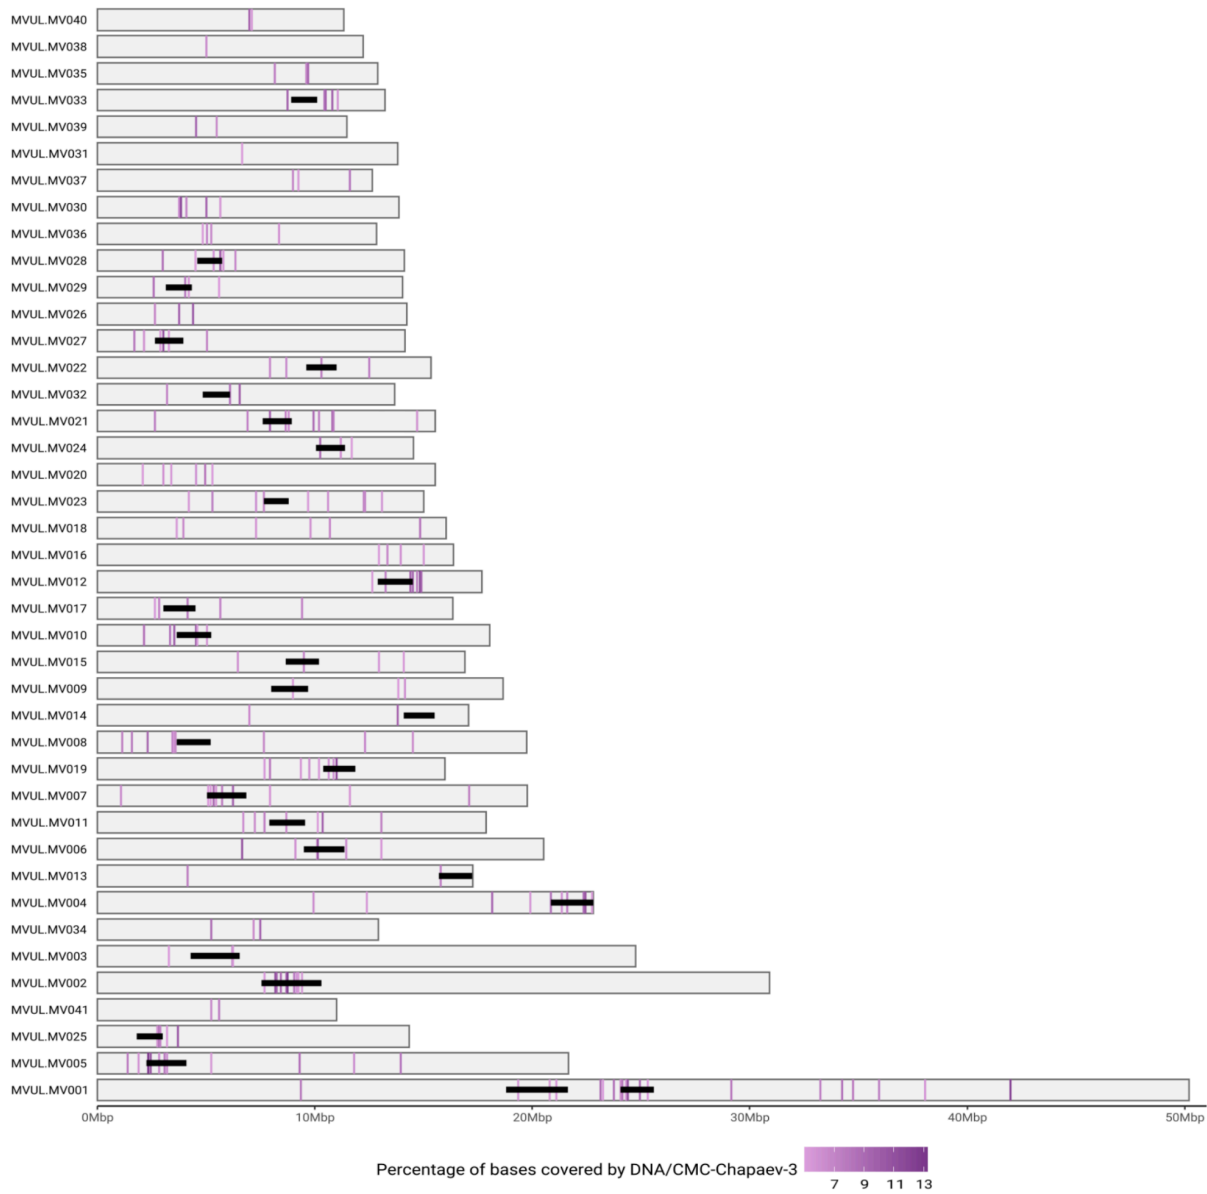

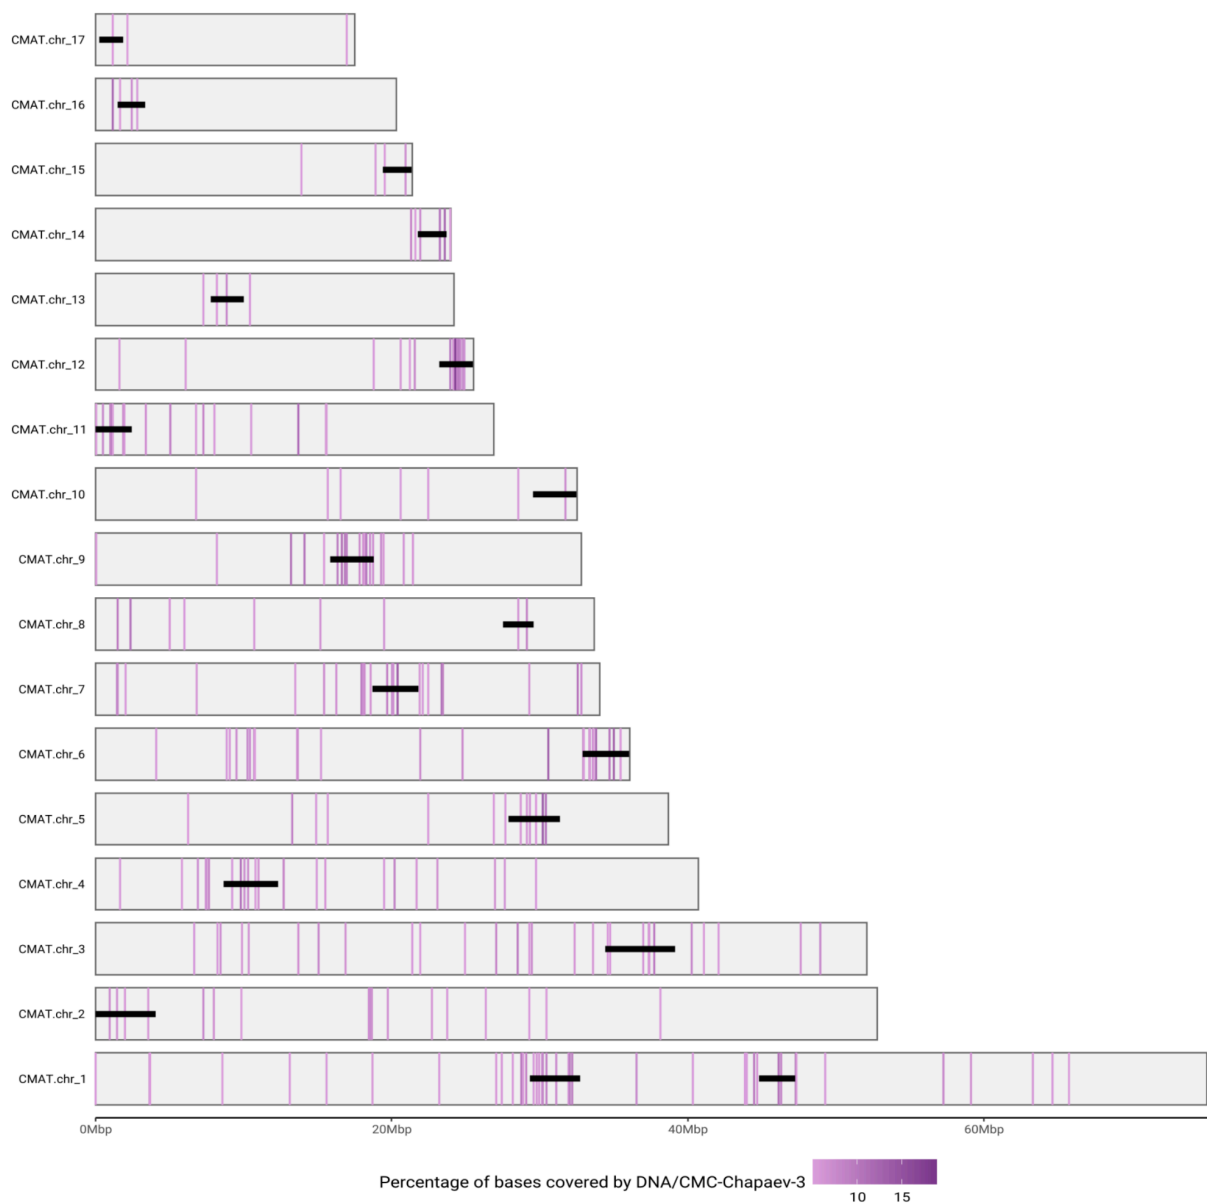

Supplement: Supplementary file 7 [file 764078633d5b99a5b9826a3f.pdf]
