# Supplementary material for: A punctuated burst of massive genomic rearrangements by chromosome shattering and the origin of non-marine annelids
Source: Research Square preprint supplement (doi:10.21203/rs.3.rs-4346819/v1), 2024-05-21

**Supplementary Data 10.** Gene Ontology (GO) enrichment of genes in HOGs lost in Clitellata. Up, treemap visualisation of all terms (CC, Cellular Component; BP, Biological Process; MF, Molecular Function). Down, bar plot of GOs enriched in functions related to cell cycle, chromatin remodelling, DNA repair and genome stability.

## TreeMap\_Enrichm\_node63\_LOST\_CC

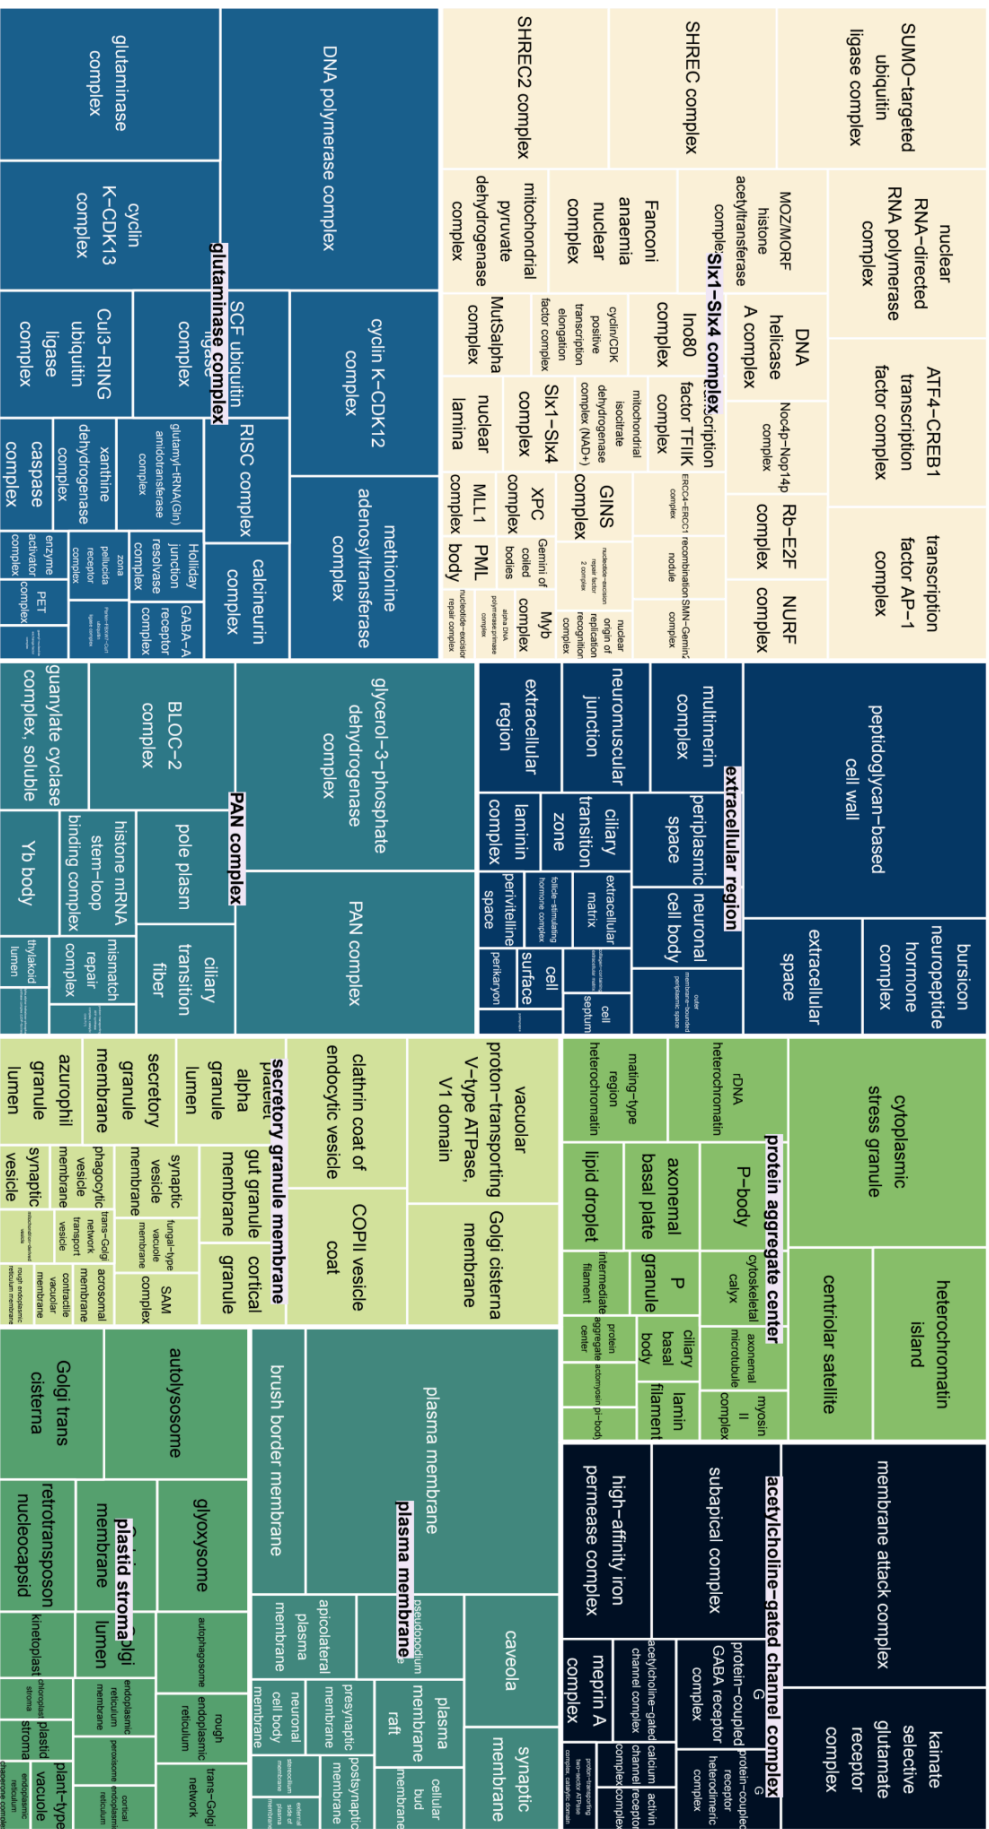

## TreeMap\_Enrichm\_node63\_LOST\_BP

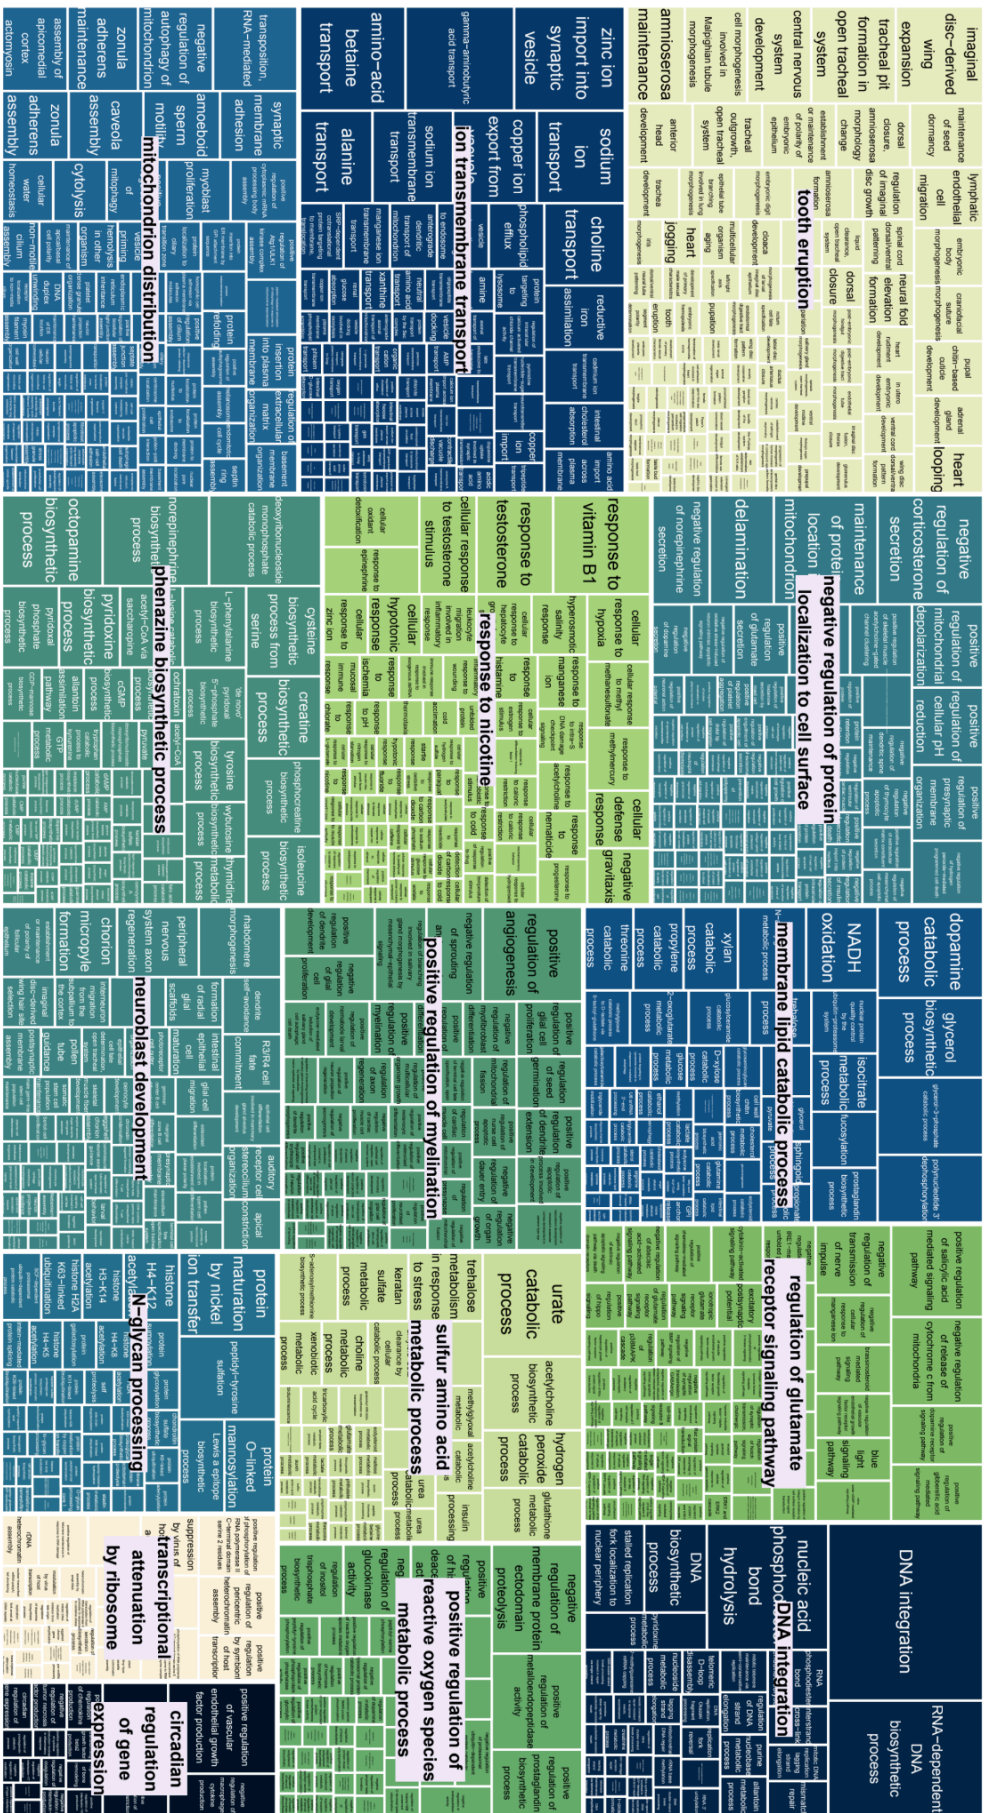

## TreeMap\_Enrichm\_node63\_LOST\_MF

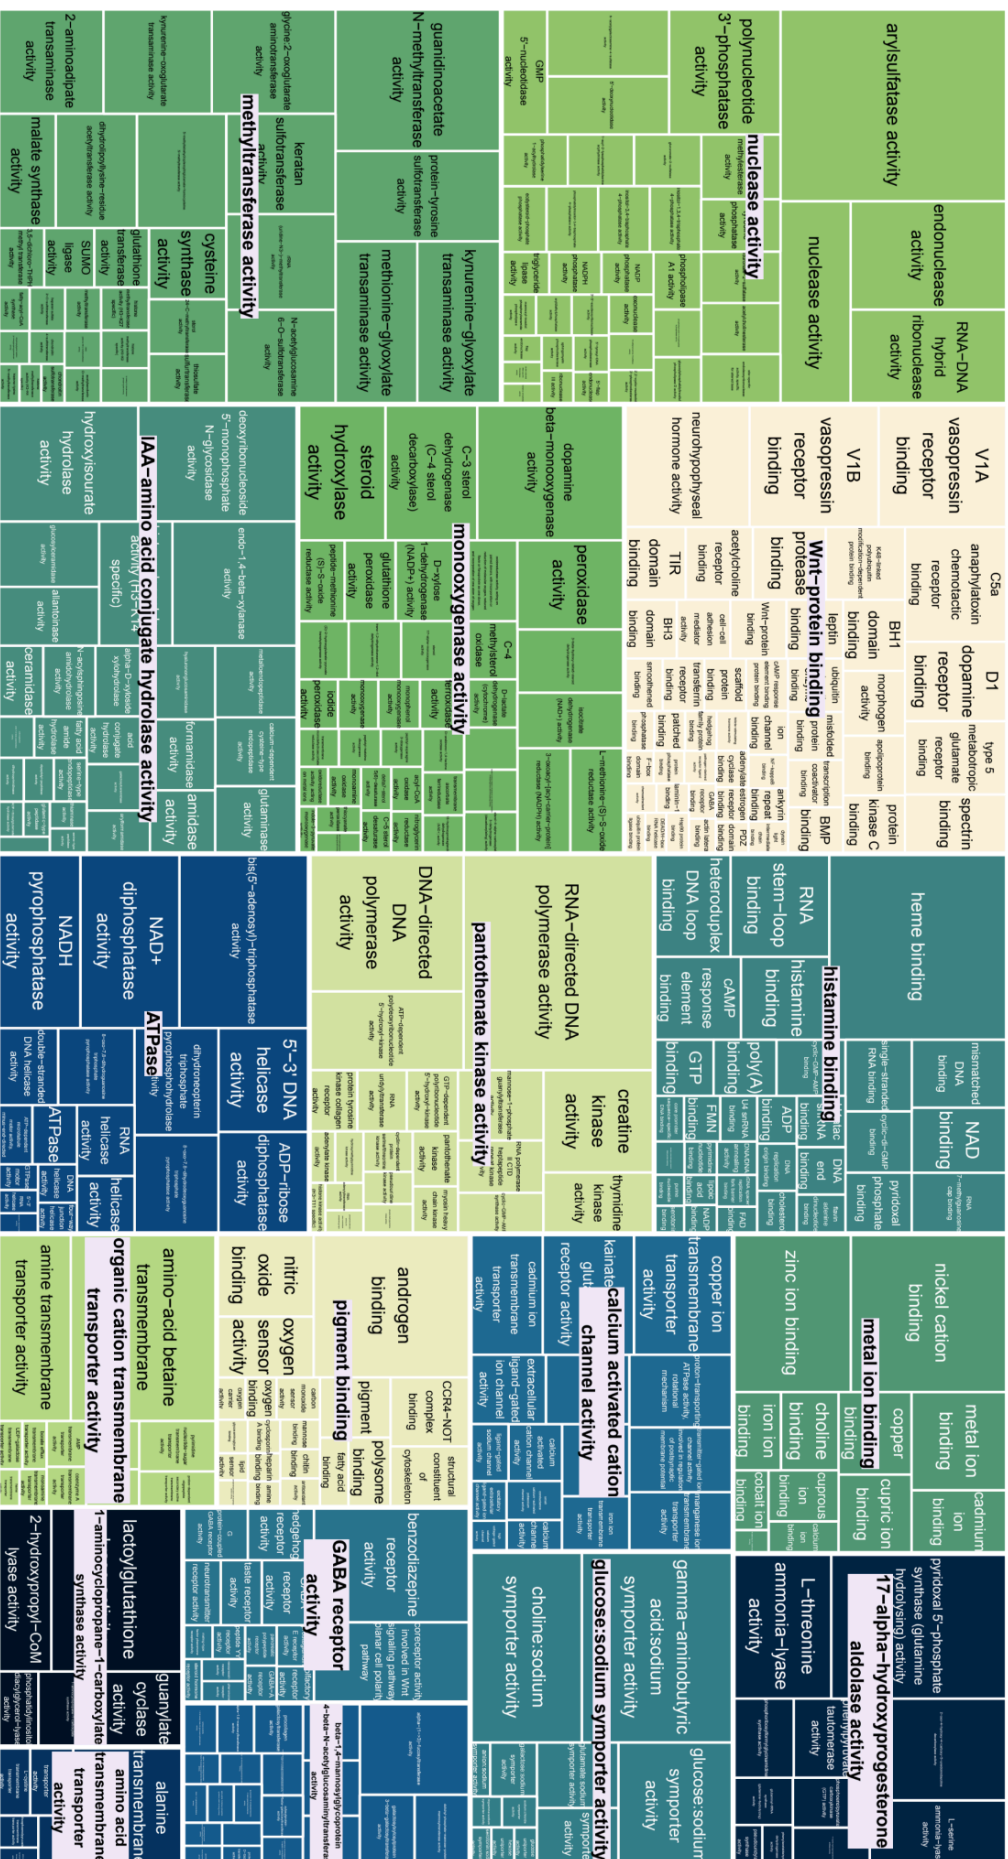

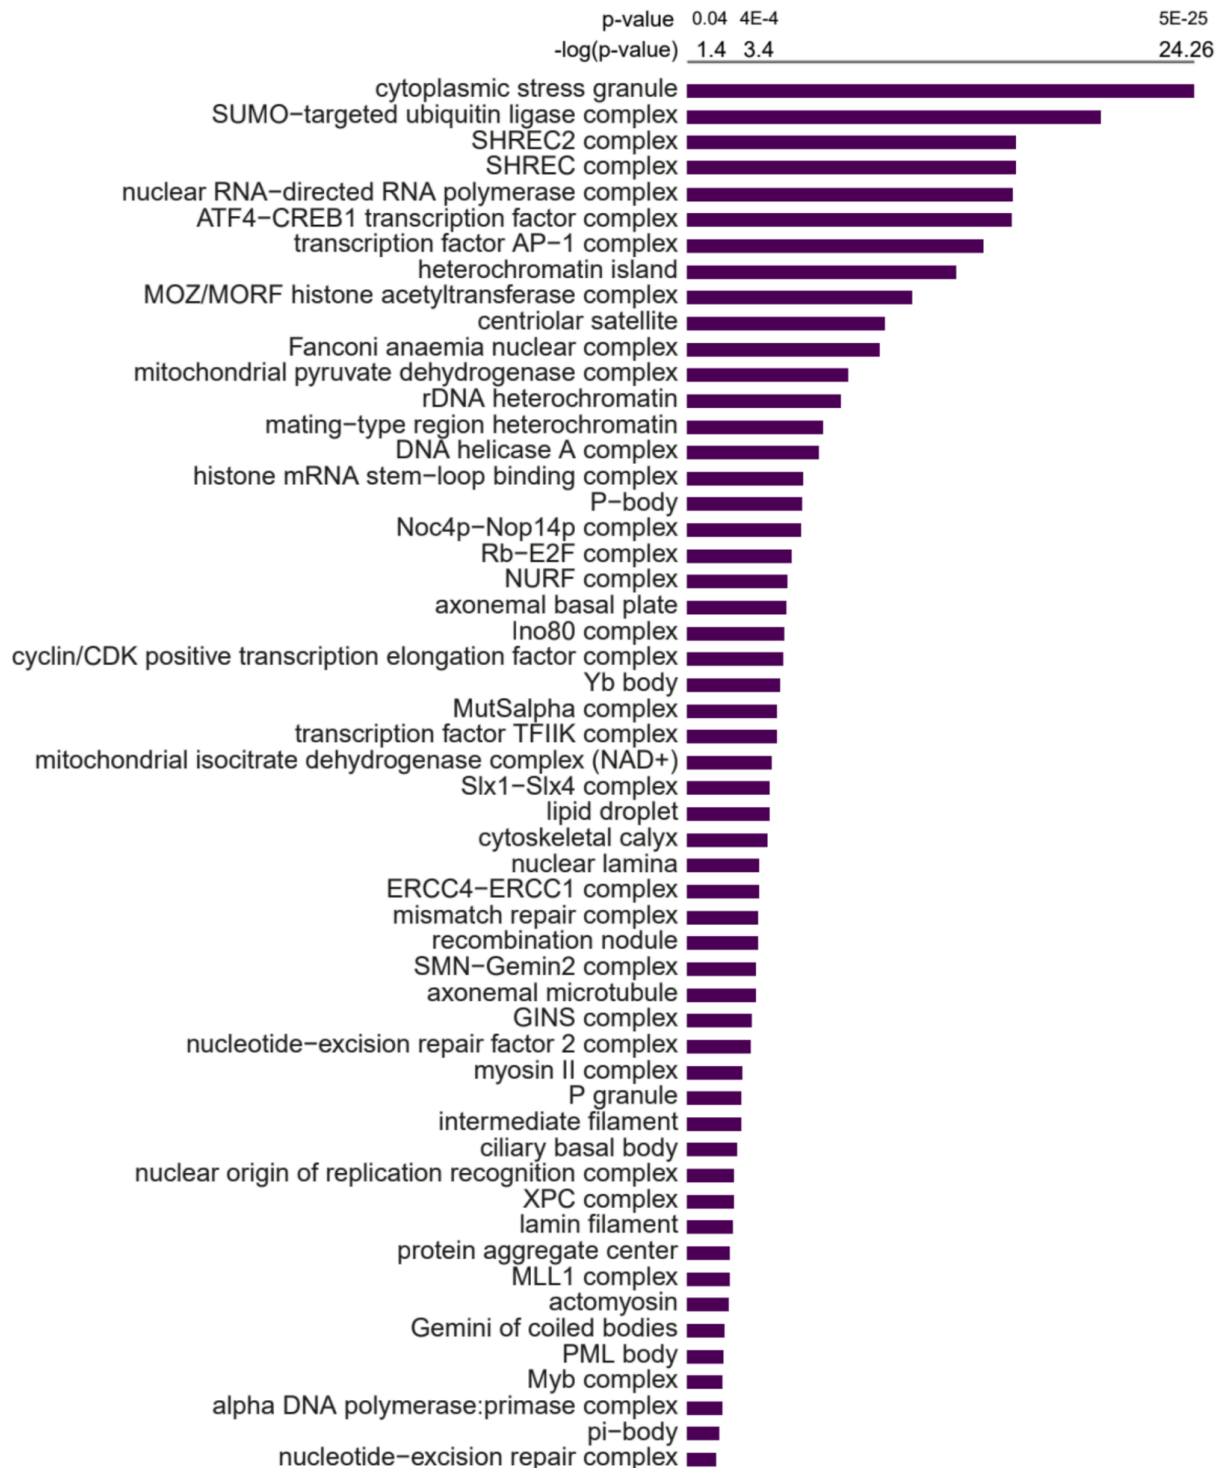

Supplement: Supplementary file 9 [file af02bbd5196565a93cfc14ef.pdf]
